# Supplementary material for: PATTY corrects open-chromatin bias for improved bulk and single-cell CUT&amp;Tag profiling
Source: Research Square preprint supplement (doi:10.21203/rs.3.rs-7632127/v1), 2025-09-26
Supplement: Supplementary file 1 [file 57f68be40a28960d0cf58d0a.xlsx]

## Sheet: Table S1
accession	cell type/line	factor	data type	usage
GSM3536507	K562	H3K27me3	CUT&Tag
GSM3536508	K562	H3K27me3	CUT&Tag
GSM3536509	K562	H3K27me3	CUT&Tag
GSM3536510	K562	H3K27me3	CUT&Tag
GSM3536511	K562	H3K27me3	CUT&Tag
GSM3536512	K562	H3K27me3	CUT&Tag
GSM3536513	K562	H3K27me3	CUT&Tag
GSM3536515	K562	H3K27me3	CUT&Tag
GSM3560261	K562	H3K27me3	CUT&Tag
GSM3680215	K562	H3K27me3	CUT&Tag
GSM3680216	K562	H3K27me3	CUT&Tag
GSM3680217	K562	H3K27me3	CUT&Tag
GSM3680218	K562	H3K27me3	CUT&Tag
GSM3680219	K562	H3K27me3	CUT&Tag
GSM3680220	K562	H3K27me3	CUT&Tag
GSM3680221	K562	H3K27me3	CUT&Tag
GSM3680222	K562	H3K27me3	CUT&Tag
GSM4308151	K562	H3K27me3	CUT&Tag
GSM4308152	K562	H3K27me3	CUT&Tag
GSM4308145	K562	H3K27me3	high-salt CUT&Tag	Fig.5 A-B, Sample 1
GSM4308146	K562	H3K27me3	high-salt CUT&Tag	Fig.5 A-B, Sample 2
GSM4308147	K562	H3K27me3	high-salt CUT&Tag	Fig.5 A-B, Sample 3
GSM4308148	K562	H3K27me3	high-salt CUT&Tag	Fig.5 A-B, Sample 4
GSM5549925	K562	H3K27me3	CUTAC	Fig.5 C-D, Sample 1
GSM5549926	K562	H3K27me3	CUTAC	Fig.5 C-D, Sample 2
GSM5549927	K562	H3K27me3	CUTAC	Fig.5 C-D, Sample 3
GSM5549928	K562	H3K27me3	CUTAC	Fig.5 C-D, Sample 4
GSM5549929	K562	H3K27me3	CUTAC	Fig.5 C-D, Sample 5
GSM5549930	K562	H3K27me3	CUTAC	Fig.5 C-D, Sample 6
GSM5549931	K562	H3K27me3	CUTAC	Fig.5 C-D, Sample 7
GSM5549932	K562	H3K27me3	CUTAC	Fig.5 C-D, Sample 8
GSM5549933	K562	H3K27me3	CUTAC	Fig.5 C-D, Sample 9
GSM3536514	K562	H3K27ac	CUT&Tag	Fig.5 E-F
GSM3680227	K562	IgG	CUT&Tag
GSM608166,GSM608167	K562	H3K27me3	ChIP-seq
GSM1652918	K562	H3K27ac	ChIP-seq
GSE172697	K562	ATAC	ATAC-seq
GSE78557	K562	RNA	RNA-seq
GSE19090	K562	RNA	exon array
GSM1480325	K562	nacent RNA	GRO-seq
GSM2423412	K562	RNAPII	ChIP-seq
GSM803443	K562	RNAPII s5p	ChIP-seq
GSM4835704	K562	H3K9me3	CUT&Tag
GSM4842201	K562	H3K9me3	CUT&Tag
GSM3560262	K562	H3K9ac	CUT&Tag
GSM3536497	H1	H3K27ac	CUT&Tag	Fig.5 I-J
GSM5549907	H1	H3K27me3	CUTAC	Fig.5 G-H, Sample 1
GSM5549908	H1	H3K27me3	CUTAC	Fig.5 G-H, Sample 2
GSM5549909	H1	H3K27me3	CUTAC	Fig.5 G-H, Sample 3
GSM5549910	H1	H3K27me3	CUTAC	Fig.5 G-H, Sample 4
GSM5549911	H1	H3K27me3	CUTAC	Fig.5 G-H, Sample 5
GSM5549912	H1	H3K27me3	CUTAC	Fig.5 G-H, Sample 6
GSM2264818	H1	ATAC	ATAC-seq
GSM958743	H1	RNA	RNA-seq
GSM3560256	H1	IgG	CUT&Tag
GSM646336	H1	H3K27ac	ChIP-seq
GSM874985	H1	H3K27me3	ChIP-seq
GSM958749	HCT116	RNA	RNA-seq
GSM5214800	HCT116	ATAC	ATAC-seq
GSM2308430	HCT116	H3K9me3	ChIP-seq
GSM2527456	HCT116	H3K9ac	ChIP-seq
GSE198467	mouse brain	H3K27me3 / H3K27ac / ATAC (single cell)	nanoCT
GSE195725	human PBMC	H3K27me3 / H3K27ac (single cell)	scCUT&Tag-pro
GSM5008737	human PBMC	RNA (single cell)	scRNA-seq
GSM8473080	AN3CA	H3K27me3	high-salt CUT&Tag	Fig.1 G-I
GSM8473084	Ishikawa	H3K27me3	high-salt CUT&Tag	Fig.1 G-I
GSM8473088	PDX164	H3K27me3	high-salt CUT&Tag	Fig.1 G-I
GSM8473092	PDX333	H3K27me3	high-salt CUT&Tag	Fig.1 G-I
GSM8473096	PDX441	H3K27me3	high-salt CUT&Tag	Fig.1 G-I
GSM7662353	LNCaP	H3K27me3	CUT&Tag (no clear protocol description)	Fig.1 G-I
GSM7662354	LNCaP	H3K27me3	CUT&Tag (no clear protocol description)	Fig.1 G-I
GSM7662355	LNCaP	H3K27me3	CUT&Tag (no clear protocol description)	Fig.1 G-I
GSM7662356	LNCaP	H3K27me3	CUT&Tag (no clear protocol description)	Fig.1 G-I
GSM8791939	advanced prostate cancer	H3K27me3	CUT&Tag	Fig.1 G-I
GSM8791941	advanced prostate cancer	H3K27me3	CUT&Tag	Fig.1 G-I
GSM8791944	advanced prostate cancer	H3K27me3	CUT&Tag	Fig.1 G-I
GSM8791946	advanced prostate cancer	H3K27me3	CUT&Tag	Fig.1 G-I
GSM8791948	advanced prostate cancer	H3K27me3	CUT&Tag	Fig.1 G-I
GSM8791950	advanced prostate cancer	H3K27me3	CUT&Tag	Fig.1 G-I
GSM8791952	advanced prostate cancer	H3K27me3	CUT&Tag	Fig.1 G-I
GSM8791954	advanced prostate cancer	H3K27me3	CUT&Tag	Fig.1 G-I
GSM8791956	advanced prostate cancer	H3K27me3	CUT&Tag	Fig.1 G-I
GSM8791958	advanced prostate cancer	H3K27me3	CUT&Tag	Fig.1 G-I
GSM8791960	advanced prostate cancer	H3K27me3	CUT&Tag	Fig.1 G-I
GSM8791962	advanced prostate cancer	H3K27me3	CUT&Tag	Fig.1 G-I
GSM8791964	advanced prostate cancer	H3K27me3	CUT&Tag	Fig.1 G-I
GSM8791966	advanced prostate cancer	H3K27me3	CUT&Tag	Fig.1 G-I
GSM8791968	advanced prostate cancer	H3K27me3	CUT&Tag	Fig.1 G-I
GSM8791969	advanced prostate cancer	H3K27me3	CUT&Tag	Fig.1 G-I
GSM8791971	advanced prostate cancer	H3K27me3	CUT&Tag	Fig.1 G-I
GSM8791973	advanced prostate cancer	H3K27me3	CUT&Tag	Fig.1 G-I
GSM8791975	advanced prostate cancer	H3K27me3	CUT&Tag	Fig.1 G-I
GSM8791977	advanced prostate cancer	H3K27me3	CUT&Tag	Fig.1 G-I
GSM8791979	advanced prostate cancer	H3K27me3	CUT&Tag	Fig.1 G-I
GSM8791981	advanced prostate cancer	H3K27me3	CUT&Tag	Fig.1 G-I
GSM8791983	advanced prostate cancer	H3K27me3	CUT&Tag	Fig.1 G-I
GSM8791985	advanced prostate cancer	H3K27me3	CUT&Tag	Fig.1 G-I
GSM8791987	advanced prostate cancer	H3K27me3	CUT&Tag	Fig.1 G-I
GSM8967725	FHSC14	H3K27me3	high-salt CUT&Tag	Fig.1 G-I
GSM8967726	FHSC14	H3K27me3	high-salt CUT&Tag	Fig.1 G-I
GSM8967727	FHSC14	H3K27me3	high-salt CUT&Tag	Fig.1 G-I
GSM8967728	FHSC14	H3K27me3	high-salt CUT&Tag	Fig.1 G-I
GSM8967729	FHSC14	H3K27me3	high-salt CUT&Tag	Fig.1 G-I
GSM8967730	FHSC14	H3K27me3	high-salt CUT&Tag	Fig.1 G-I
GSM8967731	FHSC14	H3K27me3	high-salt CUT&Tag	Fig.1 G-I
GSM8967732	FHSC14	H3K27me3	high-salt CUT&Tag	Fig.1 G-I
GSM8967733	FHSC14	H3K27me3	high-salt CUT&Tag	Fig.1 G-I
GSM8967734	FHSC14	H3K27me3	high-salt CUT&Tag	Fig.1 G-I
GSM8967735	FHSC14	H3K27me3	high-salt CUT&Tag	Fig.1 G-I
GSM8967736	FHSC14	H3K27me3	high-salt CUT&Tag	Fig.1 G-I
GSM8335808	T47D	H3K27me3	CUT&Tag	Fig.1 G-I
GSM8335811	BT-549	H3K27me3	CUT&Tag	Fig.1 G-I
GSM8488491	EM1	H3K27me3	CUT&Tag	Fig.1 G-I
GSM8488492	EM1	H3K27me3	CUT&Tag	Fig.1 G-I
GSM8285247	OVCAR5	H3K27me3	CUT&Tag	Fig.1 G-I
GSM8285248	OVCAR5	H3K27me3	CUT&Tag	Fig.1 G-I
GSM8285249	OVCAR5	H3K27me3	CUT&Tag	Fig.1 G-I
GSM8285250	OVCAR5	H3K27me3	CUT&Tag	Fig.1 G-I
GSM8214540	HEK293	H3K27me3	high-salt CUT&Tag	Fig.1 G-I
GSM8214541	HEK293	H3K27me3	high-salt CUT&Tag	Fig.1 G-I
GSM8214542	HEK293	H3K27me3	high-salt CUT&Tag	Fig.1 G-I
GSM8214543	HEK293	H3K27me3	high-salt CUT&Tag	Fig.1 G-I
GSM8214544	HEK293	H3K27me3	high-salt CUT&Tag	Fig.1 G-I
GSM8214545	HEK293	H3K27me3	high-salt CUT&Tag	Fig.1 G-I
GSM8636969	SU-DIPG-XVII	H3K27me3	high-salt CUT&Tag	Fig.1 G-I
GSM8636970	SU-DIPG-XVII	H3K27me3	high-salt CUT&Tag	Fig.1 G-I
GSM8636971	SU-DIPG-XVII	H3K27me3	high-salt CUT&Tag	Fig.1 G-I
GSM8636972	SU-DIPG-XVII	H3K27me3	high-salt CUT&Tag	Fig.1 G-I
GSM8636973	SU-DIPG-XVII	H3K27me3	high-salt CUT&Tag	Fig.1 G-I
GSM8636974	SU-DIPG-XVII	H3K27me3	high-salt CUT&Tag	Fig.1 G-I
GSM7979480	DIPG17	H3K27me3	CUT&Tag	Fig.1 G-I
GSM7979481	DIPG17	H3K27me3	CUT&Tag	Fig.1 G-I
GSM8434743	AC16	H3K27me3	high-salt CUT&Tag	Fig.1 G-I
GSM8434744	AC16	H3K27me3	high-salt CUT&Tag	Fig.1 G-I
GSM8434745	AC16	H3K27me3	high-salt CUT&Tag	Fig.1 G-I
GSM8757911	hiPSC-derived ExpLBM	H3K27me3	high-salt CUT&Tag	Fig.1 G-I
GSM8757917	hiPSC	H3K27me3	high-salt CUT&Tag	Fig.1 G-I
GSM8757919	hiPSC-derived LBM	H3K27me3	high-salt CUT&Tag	Fig.1 G-I
GSM8757921	hiPSC-derived LPM	H3K27me3	high-salt CUT&Tag	Fig.1 G-I
GSM8757927	hiPSC-derived ExpLBM	H3K27me3	high-salt CUT&Tag	Fig.1 G-I
GSM8757929	hiPSC	H3K27me3	high-salt CUT&Tag	Fig.1 G-I
GSM8757931	hiPSC-derived LBM	H3K27me3	high-salt CUT&Tag	Fig.1 G-I
GSM8757933	hiPSC-derived LPM	H3K27me3	high-salt CUT&Tag	Fig.1 G-I
GSM7993617	HUCCT1	H3K27me3	high-salt CUT&Tag	Fig.1 G-I
GSM8723679	HMEC DD	H3K27me3	high-salt CUT&Tag	Fig.1 G-I
GSM8723680	HMEC DD	H3K27me3	high-salt CUT&Tag	Fig.1 G-I
GSM8723681	HMEC DD	H3K27me3	high-salt CUT&Tag	Fig.1 G-I
GSM8723682	HMEC DD	H3K27me3	high-salt CUT&Tag	Fig.1 G-I
GSM8728361	K562	H3K27me3	high-salt CUT&Tag	Fig.1 G-I
GSM8728362	K562	H3K27me3	high-salt CUT&Tag	Fig.1 G-I
GSM8728366	K562	H3K27me3	high-salt CUT&Tag	Fig.1 G-I
GSM8728376	K562	H3K27me3	high-salt CUT&Tag	Fig.1 G-I
GSM8728381	K562	H3K27me3	high-salt CUT&Tag	Fig.1 G-I
GSM8728386	K562	H3K27me3	high-salt CUT&Tag	Fig.1 G-I
GSM8728391	K562	H3K27me3	high-salt CUT&Tag	Fig.1 G-I
GSM8707256	HAP1	H3K27me3	high-salt CUT&Tag	Fig.1 G-I
GSM8707262	HAP1	H3K27me3	high-salt CUT&Tag	Fig.1 G-I
GSM8707268	HAP1	H3K27me3	high-salt CUT&Tag	Fig.1 G-I
GSM8699803	hiPSC-derived forebrain organoid	H3K27me3	high-salt CUT&Tag	Fig.1 G-I
GSM8699804	hiPSC-derived forebrain organoid	H3K27me3	high-salt CUT&Tag	Fig.1 G-I
GSM8699811	hiPSC-derived forebrain organoid	H3K27me3	high-salt CUT&Tag	Fig.1 G-I
GSM8699812	hiPSC-derived forebrain organoid	H3K27me3	high-salt CUT&Tag	Fig.1 G-I
GSM8390861	TMD8	H3K27me3	CUT&Tag (no clear protocol description)	Fig.1 G-I
GSM8390865	TMD8	H3K27me3	CUT&Tag (no clear protocol description)	Fig.1 G-I
GSM8390869	TMD8	H3K27me3	CUT&Tag (no clear protocol description)	Fig.1 G-I
GSM8390873	TMD8	H3K27me3	CUT&Tag (no clear protocol description)	Fig.1 G-I
GSM8507180	K562	H3K27me3	high-salt CUT&Tag	Fig.1 G-I
GSM8507183	K562	H3K27me3	high-salt CUT&Tag	Fig.1 G-I
GSM8507185	K562	H3K27me3	high-salt CUT&Tag	Fig.1 G-I
GSM8061327	LuCaP	H3K27me3	CUT&Tag (no clear protocol description)	Fig.1 G-I
GSM8061328	LuCaP	H3K27me3	CUT&Tag (no clear protocol description)	Fig.1 G-I
GSM8061329	LuCaP	H3K27me3	CUT&Tag (no clear protocol description)	Fig.1 G-I
GSM8061330	LuCaP	H3K27me3	CUT&Tag (no clear protocol description)	Fig.1 G-I
GSM8061331	LuCaP	H3K27me3	CUT&Tag (no clear protocol description)	Fig.1 G-I
GSM8061332	LuCaP	H3K27me3	CUT&Tag (no clear protocol description)	Fig.1 G-I
GSM8061333	NCI-H660	H3K27me3	CUT&Tag (no clear protocol description)	Fig.1 G-I
GSM8061334	LuCaP	H3K27me3	CUT&Tag (no clear protocol description)	Fig.1 G-I
GSM8224857	mesenchymal stromal cells	H3K27me3	high-salt CUT&Tag	Fig.1 G-I
GSM8224858	mesenchymal stromal cells	H3K27me3	high-salt CUT&Tag	Fig.1 G-I
GSM8224865	pluripotent stem cells	H3K27me3	high-salt CUT&Tag	Fig.1 G-I
GSM8224866	pluripotent stem cells	H3K27me3	high-salt CUT&Tag	Fig.1 G-I
GSM8224873	pluripotent stem cells	H3K27me3	high-salt CUT&Tag	Fig.1 G-I
GSM8224874	pluripotent stem cells	H3K27me3	high-salt CUT&Tag	Fig.1 G-I
GSM8224881	pluripotent stem cells	H3K27me3	high-salt CUT&Tag	Fig.1 G-I
GSM8224882	pluripotent stem cells	H3K27me3	high-salt CUT&Tag	Fig.1 G-I
GSM8224889	pluripotent stem cells	H3K27me3	high-salt CUT&Tag	Fig.1 G-I
GSM8224890	pluripotent stem cells	H3K27me3	high-salt CUT&Tag	Fig.1 G-I
GSM8224897	pluripotent stem cells	H3K27me3	high-salt CUT&Tag	Fig.1 G-I
GSM8224898	pluripotent stem cells	H3K27me3	high-salt CUT&Tag	Fig.1 G-I
GSM8224905	pluripotent stem cells	H3K27me3	high-salt CUT&Tag	Fig.1 G-I
GSM8224906	pluripotent stem cells	H3K27me3	high-salt CUT&Tag	Fig.1 G-I
GSM8287598	HepG2	H3K27me3	high-salt CUT&Tag	Fig.1 G-I
GSM8287599	HepG2	H3K27me3	high-salt CUT&Tag	Fig.1 G-I
GSM8287600	HepG2	H3K27me3	high-salt CUT&Tag	Fig.1 G-I
GSM8287601	HepG2	H3K27me3	high-salt CUT&Tag	Fig.1 G-I
GSM8287602	HepG2	H3K27me3	high-salt CUT&Tag	Fig.1 G-I
GSM8287603	HepG2	H3K27me3	high-salt CUT&Tag	Fig.1 G-I
GSM8287604	HepG2	H3K27me3	high-salt CUT&Tag	Fig.1 G-I
GSM8287605	HepG2	H3K27me3	high-salt CUT&Tag	Fig.1 G-I
GSM8287606	HepG2	H3K27me3	high-salt CUT&Tag	Fig.1 G-I
GSM8287607	HepG2	H3K27me3	high-salt CUT&Tag	Fig.1 G-I
GSM8287608	HepG2	H3K27me3	high-salt CUT&Tag	Fig.1 G-I
GSM8287609	HepG2	H3K27me3	high-salt CUT&Tag	Fig.1 G-I
GSM8432154	CD34+ hematopoietic stem and progenitor cell	H3K27me3	high-salt CUT&Tag	Fig.1 G-I
GSM8432156	CD34+ hematopoietic stem and progenitor cell	H3K27me3	high-salt CUT&Tag	Fig.1 G-I
GSM8432158	CD34+ hematopoietic stem and progenitor cell	H3K27me3	high-salt CUT&Tag	Fig.1 G-I
GSM8558106	HUVECs	H3K27me3	CUT&Tag (no clear protocol description)	Fig.1 G-I
GSM8558107	HUVECs	H3K27me3	CUT&Tag (no clear protocol description)	Fig.1 G-I
GSM7884673	SW1990	H3K27me3	high-salt CUT&Tag	Fig.1 G-I
GSM7884674	SW1990	H3K27me3	high-salt CUT&Tag	Fig.1 G-I
GSM7884645	AsPC1	H3K27me3	high-salt CUT&Tag	Fig.1 G-I
GSM7884646	AsPC1	H3K27me3	high-salt CUT&Tag	Fig.1 G-I
GSM8516103	T47D	H3K27me3	high-salt CUT&Tag	Fig.1 G-I
GSM8516104	T47D	H3K27me3	high-salt CUT&Tag	Fig.1 G-I
GSM8128056	HL60	H3K27me3	high-salt CUT&Tag	Fig.1 G-I
GSM8128057	HL60	H3K27me3	high-salt CUT&Tag	Fig.1 G-I
GSM8128065	HL60	H3K27me3	high-salt CUT&Tag	Fig.1 G-I
GSM8128066	HL60	H3K27me3	high-salt CUT&Tag	Fig.1 G-I
GSM8445027	HGC-27	H3K27me3	CUT&Tag (no clear protocol description)	Fig.1 G-I
GSM8445028	HGC-27	H3K27me3	CUT&Tag (no clear protocol description)	Fig.1 G-I
GSM8445029	HGC-27	H3K27me3	CUT&Tag (no clear protocol description)	Fig.1 G-I
GSM8445030	HGC-27	H3K27me3	CUT&Tag (no clear protocol description)	Fig.1 G-I
GSM8445031	HGC-27	H3K27me3	CUT&Tag (no clear protocol description)	Fig.1 G-I
GSM8445032	HGC-27	H3K27me3	CUT&Tag (no clear protocol description)	Fig.1 G-I
GSM8445033	HGC-27	H3K27me3	CUT&Tag (no clear protocol description)	Fig.1 G-I
GSM8445034	HGC-27	H3K27me3	CUT&Tag (no clear protocol description)	Fig.1 G-I
GSM8445035	HGC-27	H3K27me3	CUT&Tag (no clear protocol description)	Fig.1 G-I
GSM8445036	HGC-27	H3K27me3	CUT&Tag (no clear protocol description)	Fig.1 G-I
GSM8445037	HGC-27	H3K27me3	CUT&Tag (no clear protocol description)	Fig.1 G-I
GSM7669091	HepG2	H3K27me3	CUT&Tag (no clear protocol description)	Fig.1 G-I
GSM7669097	HepG2	H3K27me3	CUT&Tag (no clear protocol description)	Fig.1 G-I
GSM7763547	TYUC-1	H3K27me3	high-salt CUT&Tag	Fig.1 G-I
GSM7763548	TYUC-1	H3K27me3	high-salt CUT&Tag	Fig.1 G-I
GSM7763549	TYUC-1	H3K27me3	high-salt CUT&Tag	Fig.1 G-I
GSM8377510	WI38	H3K27me3	high-salt CUT&Tag	Fig.1 G-I
GSM8377511	WI38	H3K27me3	high-salt CUT&Tag	Fig.1 G-I
GSM8377512	WI38	H3K27me3	high-salt CUT&Tag	Fig.1 G-I
GSM8377513	WI38	H3K27me3	high-salt CUT&Tag	Fig.1 G-I
GSM8377514	WI38	H3K27me3	high-salt CUT&Tag	Fig.1 G-I
GSM8377515	WI38	H3K27me3	high-salt CUT&Tag	Fig.1 G-I
GSM8377528	WI38	H3K27me3	high-salt CUT&Tag	Fig.1 G-I
GSM8377529	WI38	H3K27me3	high-salt CUT&Tag	Fig.1 G-I
GSM8377530	WI38	H3K27me3	high-salt CUT&Tag	Fig.1 G-I
GSM8377531	WI38	H3K27me3	high-salt CUT&Tag	Fig.1 G-I
GSM8377532	WI38	H3K27me3	high-salt CUT&Tag	Fig.1 G-I
GSM8377533	WI38	H3K27me3	high-salt CUT&Tag	Fig.1 G-I
GSM8087408	Liver	H3K27me3	CUT&Tag (no clear protocol description)	Fig.1 G-I
GSM8087409	Lymph node	H3K27me3	CUT&Tag (no clear protocol description)	Fig.1 G-I
GSM8087410	Liver	H3K27me3	CUT&Tag (no clear protocol description)	Fig.1 G-I
GSM8087411	Lymph node	H3K27me3	CUT&Tag (no clear protocol description)	Fig.1 G-I
GSM8087412	Lymph node	H3K27me3	CUT&Tag (no clear protocol description)	Fig.1 G-I
GSM8087413	Liver	H3K27me3	CUT&Tag (no clear protocol description)	Fig.1 G-I
GSM8087414	Lymph node	H3K27me3	CUT&Tag (no clear protocol description)	Fig.1 G-I
GSM8087415	Bone	H3K27me3	CUT&Tag (no clear protocol description)	Fig.1 G-I
GSM8087416	Liver	H3K27me3	CUT&Tag (no clear protocol description)	Fig.1 G-I
GSM8087417	Lymph node	H3K27me3	CUT&Tag (no clear protocol description)	Fig.1 G-I
GSM8087418	Prostate	H3K27me3	CUT&Tag (no clear protocol description)	Fig.1 G-I
GSM8087419	Prostate	H3K27me3	CUT&Tag (no clear protocol description)	Fig.1 G-I
GSM8087420	Lymph node	H3K27me3	CUT&Tag (no clear protocol description)	Fig.1 G-I
GSM8087421	Adrenal gland	H3K27me3	CUT&Tag (no clear protocol description)	Fig.1 G-I
GSM8087422	Liver	H3K27me3	CUT&Tag (no clear protocol description)	Fig.1 G-I
GSM8087423	Liver	H3K27me3	CUT&Tag (no clear protocol description)	Fig.1 G-I
GSM8087424	Prostate	H3K27me3	CUT&Tag (no clear protocol description)	Fig.1 G-I
GSM8087425	Brain	H3K27me3	CUT&Tag (no clear protocol description)	Fig.1 G-I
GSM8351461	OCI-AML20	H3K27me3	high-salt CUT&Tag	Fig.1 G-I
GSM8351462	OCI-AML20	H3K27me3	high-salt CUT&Tag	Fig.1 G-I
GSM8351463	OCI-AML20	H3K27me3	high-salt CUT&Tag	Fig.1 G-I
GSM8351464	OCI-AML20	H3K27me3	high-salt CUT&Tag	Fig.1 G-I
GSM8351465	OCI-AML20	H3K27me3	high-salt CUT&Tag	Fig.1 G-I
GSM8351466	OCI-AML20	H3K27me3	high-salt CUT&Tag	Fig.1 G-I
GSM8351467	YCU-AML1	H3K27me3	high-salt CUT&Tag	Fig.1 G-I
GSM8351468	YCU-AML1	H3K27me3	high-salt CUT&Tag	Fig.1 G-I
GSM8351469	YCU-AML1	H3K27me3	high-salt CUT&Tag	Fig.1 G-I
GSM8351470	YCU-AML1	H3K27me3	high-salt CUT&Tag	Fig.1 G-I
GSM8351471	YCU-AML1	H3K27me3	high-salt CUT&Tag	Fig.1 G-I
GSM8351472	YCU-AML1	H3K27me3	high-salt CUT&Tag	Fig.1 G-I
GSM8351473	FKH-1	H3K27me3	high-salt CUT&Tag	Fig.1 G-I
GSM8351474	FKH-1	H3K27me3	high-salt CUT&Tag	Fig.1 G-I
GSM8351475	FKH-1	H3K27me3	high-salt CUT&Tag	Fig.1 G-I
GSM8351476	FKH-1	H3K27me3	high-salt CUT&Tag	Fig.1 G-I
GSM8351477	FKH-1	H3K27me3	high-salt CUT&Tag	Fig.1 G-I
GSM8351478	FKH-1	H3K27me3	high-salt CUT&Tag	Fig.1 G-I
GSM8351479	Kasumi-3	H3K27me3	high-salt CUT&Tag	Fig.1 G-I
GSM8351480	Kasumi-3	H3K27me3	high-salt CUT&Tag	Fig.1 G-I
GSM8351481	Kasumi-3	H3K27me3	high-salt CUT&Tag	Fig.1 G-I
GSM8351482	Kasumi-3	H3K27me3	high-salt CUT&Tag	Fig.1 G-I
GSM8351483	Kasumi-3	H3K27me3	high-salt CUT&Tag	Fig.1 G-I
GSM8351484	Kasumi-3	H3K27me3	high-salt CUT&Tag	Fig.1 G-I
GSM8264433	WS234	H3K27me3	CUT&Tag (no clear protocol description)	Fig.1 G-I
GSM8264434	WS234	H3K27me3	CUT&Tag (no clear protocol description)	Fig.1 G-I
GSM8129340	H9	H3K27me3	high-salt CUT&Tag	Fig.1 G-I
GSM8129341	H9	H3K27me3	high-salt CUT&Tag	Fig.1 G-I
GSM8129350	H9	H3K27me3	high-salt CUT&Tag	Fig.1 G-I
GSM8129351	H9	H3K27me3	high-salt CUT&Tag	Fig.1 G-I
GSM5009775	BE2C	H3K27me3	high-salt CUT&Tag	Fig.1 G-I
GSM5009776	BE2C	H3K27me3	high-salt CUT&Tag	Fig.1 G-I
GSM5009777	BE2C	H3K27me3	high-salt CUT&Tag	Fig.1 G-I
GSM5009778	BE2C	H3K27me3	high-salt CUT&Tag	Fig.1 G-I
GSM7815709	HEK293T	H3K27me3	high-salt CUT&Tag	Fig.1 G-I
GSM7815710	HEK293T	H3K27me3	high-salt CUT&Tag	Fig.1 G-I
GSM7815711	HEK293T	H3K27me3	high-salt CUT&Tag	Fig.1 G-I
GSM7815712	HEK293T	H3K27me3	high-salt CUT&Tag	Fig.1 G-I
GSM7815713	HEK293T	H3K27me3	high-salt CUT&Tag	Fig.1 G-I
GSM7815714	HEK293T	H3K27me3	high-salt CUT&Tag	Fig.1 G-I
GSM7925349	UC3.4	H3K27me3	high-salt CUT&Tag	Fig.1 G-I
GSM7925350	UC3.4	H3K27me3	high-salt CUT&Tag	Fig.1 G-I
GSM7925353	UC3.4	H3K27me3	high-salt CUT&Tag	Fig.1 G-I
GSM7925354	UC3.4	H3K27me3	high-salt CUT&Tag	Fig.1 G-I
GSM7729065	WIN1	H3K27me3	high-salt CUT&Tag	Fig.1 G-I
GSM7729066	WIN1	H3K27me3	high-salt CUT&Tag	Fig.1 G-I
GSM7729069	H9	H3K27me3	high-salt CUT&Tag	Fig.1 G-I
GSM7729070	H9	H3K27me3	high-salt CUT&Tag	Fig.1 G-I
GSM7729073	H9	H3K27me3	high-salt CUT&Tag	Fig.1 G-I
GSM7729074	H9	H3K27me3	high-salt CUT&Tag	Fig.1 G-I
GSM7729077	H9	H3K27me3	high-salt CUT&Tag	Fig.1 G-I
GSM7729078	H9	H3K27me3	high-salt CUT&Tag	Fig.1 G-I
GSM7101051	MOLM-13	H3K27me3	high-salt CUT&Tag	Fig.1 G-I
GSM7101052	MOLM-13	H3K27me3	high-salt CUT&Tag	Fig.1 G-I
GSM7101053	MOLM-13	H3K27me3	high-salt CUT&Tag	Fig.1 G-I
GSM7101054	MOLM-13	H3K27me3	high-salt CUT&Tag	Fig.1 G-I
GSM5974937	K562	H3K27me3	high-salt CUT&Tag	Fig.1 G-I
GSM5974940	K562	H3K27me3	high-salt CUT&Tag	Fig.1 G-I
GSM5974943	K562	H3K27me3	high-salt CUT&Tag	Fig.1 G-I
GSM5974946	K562	H3K27me3	high-salt CUT&Tag	Fig.1 G-I
GSM5974949	K562	H3K27me3	high-salt CUT&Tag	Fig.1 G-I
GSM5974952	K562	H3K27me3	high-salt CUT&Tag	Fig.1 G-I
GSM5974955	K562	H3K27me3	high-salt CUT&Tag	Fig.1 G-I
GSM5974958	K562	H3K27me3	high-salt CUT&Tag	Fig.1 G-I
GSM5974961	K562	H3K27me3	high-salt CUT&Tag	Fig.1 G-I
GSM5974964	K562	H3K27me3	high-salt CUT&Tag	Fig.1 G-I
GSM5974967	K562	H3K27me3	high-salt CUT&Tag	Fig.1 G-I
GSM5974970	K562	H3K27me3	high-salt CUT&Tag	Fig.1 G-I
GSM5974973	K562	H3K27me3	high-salt CUT&Tag	Fig.1 G-I
GSM5974976	K562	H3K27me3	high-salt CUT&Tag	Fig.1 G-I
GSM5974979	K562	H3K27me3	high-salt CUT&Tag	Fig.1 G-I
GSM5974981	K562	H3K27me3	high-salt CUT&Tag	Fig.1 G-I
GSM5974984	K562	H3K27me3	high-salt CUT&Tag	Fig.1 G-I
GSM5974987	K562	H3K27me3	high-salt CUT&Tag	Fig.1 G-I
GSM7159082	MEL1	H3K27me3	high-salt CUT&Tag	Fig.1 G-I
GSM7159083	MEL1	H3K27me3	high-salt CUT&Tag	Fig.1 G-I
GSM7159084	MEL1	H3K27me3	high-salt CUT&Tag	Fig.1 G-I
GSM7159085	MEL1	H3K27me3	high-salt CUT&Tag	Fig.1 G-I
GSM7876324	501mel	H3K27me3	high-salt CUT&Tag	Fig.1 G-I
GSM7876325	501mel	H3K27me3	high-salt CUT&Tag	Fig.1 G-I
GSM7818793	SKBR3	H3K27me3	high-salt CUT&Tag	Fig.1 G-I
GSM7818794	SKBR3	H3K27me3	high-salt CUT&Tag	Fig.1 G-I
GSM7818795	SKBR3	H3K27me3	high-salt CUT&Tag	Fig.1 G-I
GSM7818796	SKBR3	H3K27me3	high-salt CUT&Tag	Fig.1 G-I
GSM945160	HRE	H3K27me3	ENCODE UW ChIP-seq	Fig.1 G-I
GSM945180	HUVEC	H3K27me3	ENCODE UW ChIP-seq	Fig.1 G-I
GSM945183	H7hESC	H3K27me3	ENCODE UW ChIP-seq	Fig.1 G-I
GSM945196	GM12878	H3K27me3	ENCODE UW ChIP-seq	Fig.1 G-I
GSM945200	SAEC	H3K27me3	ENCODE UW ChIP-seq	Fig.1 G-I
GSM945203	Caco2	H3K27me3	ENCODE UW ChIP-seq	Fig.1 G-I
GSM945204	BJ	H3K27me3	ENCODE UW ChIP-seq	Fig.1 G-I
GSM945205	GM06990	H3K27me3	ENCODE UW ChIP-seq	Fig.1 G-I
GSM945208	HeLaS3	H3K27me3	ENCODE UW ChIP-seq	Fig.1 G-I
GSM945210	SKNSH	H3K27me3	ENCODE UW ChIP-seq	Fig.1 G-I
GSM945228	K562	H3K27me3	ENCODE UW ChIP-seq	Fig.1 G-I
GSM945231	HepG2	H3K27me3	ENCODE UW ChIP-seq	Fig.1 G-I
GSM945277	HMEC	H3K27me3	ENCODE UW ChIP-seq	Fig.1 G-I
GSM945300	NHEK	H3K27me3	ENCODE UW ChIP-seq	Fig.1 G-I
GSM1010913	AG04450	H3K27me3	ENCODE UW ChIP-seq	Fig.1 G-I
GSM733658	K562	H3K27me3	ENCODE Broad ChIP-seq	Fig.1 G-I
GSM733667	HSMM	H3K27me3	ENCODE Broad ChIP-seq	Fig.1 G-I
GSM733688	HUVEC	H3K27me3	ENCODE Broad ChIP-seq	Fig.1 G-I
GSM733696	HeLaS3	H3K27me3	ENCODE Broad ChIP-seq	Fig.1 G-I
GSM733701	NHEK	H3K27me3	ENCODE Broad ChIP-seq	Fig.1 G-I
GSM733722	HMEC	H3K27me3	ENCODE Broad ChIP-seq	Fig.1 G-I
GSM733729	NHA	H3K27me3	ENCODE Broad ChIP-seq	Fig.1 G-I
GSM733745	NHDFAd	H3K27me3	ENCODE Broad ChIP-seq	Fig.1 G-I
GSM733748	H1hESC	H3K27me3	ENCODE Broad ChIP-seq	Fig.1 G-I
GSM733758	GM12878	H3K27me3	ENCODE Broad ChIP-seq	Fig.1 G-I
GSM733764	NHLF	H3K27me3	ENCODE Broad ChIP-seq	Fig.1 G-I
GSM1003466	Osteobl	H3K27me3	ENCODE Broad ChIP-seq	Fig.1 G-I
GSM1003503	HSMMtube	H3K27me3	ENCODE Broad ChIP-seq	Fig.1 G-I
GSM1003521	Dnd41	H3K27me3	ENCODE Broad ChIP-seq	Fig.1 G-I
GSM1003577	A549	H3K27me3	ENCODE Broad ChIP-seq	Fig.1 G-I

## Sheet: Table S2
accession	cell type/line	factor	data type	%peaks not covered by ChIP-seq
GSM3536507	K562	H3K27me3	CUTTag	0.145
GSM3536508	K562	H3K27me3	CUTTag	0.1696
GSM3536509	K562	H3K27me3	CUTTag	0.158
GSM3536510	K562	H3K27me3	CUTTag	0.1481
GSM3536511	K562	H3K27me3	CUTTag	0.154
GSM3536512	K562	H3K27me3	CUTTag	0.0886
GSM3536513	K562	H3K27me3	CUTTag	0.1773
GSM3536515	K562	H3K27me3	CUTTag	0.1676
GSM3560261	K562	H3K27me3	CUTTag	0.1214
GSM3680215	K562	H3K27me3	CUTTag	0.2223
GSM3680216	K562	H3K27me3	CUTTag	0.1647
GSM3680217	K562	H3K27me3	CUTTag	0.2526
GSM3680218	K562	H3K27me3	CUTTag	0.2056
GSM3680219	K562	H3K27me3	CUTTag	0.2325
GSM3680220	K562	H3K27me3	CUTTag	0.25
GSM3680221	K562	H3K27me3	CUTTag	0.2567
GSM3680222	K562	H3K27me3	CUTTag	0.2038
GSM4308151	K562	H3K27me3	CUTTag	0.1585
GSM4308152	K562	H3K27me3	CUTTag	0.1998
average				0.182953

## Sheet: Table S3
chromosome	start	end	binID	region category
chr1	57070400	57070600	bin212923	H3K27me3_true
chr1	57070600	57070800	bin212924	H3K27me3_true
chr1	57070800	57071000	bin212925	H3K27me3_true
chr1	57071000	57071200	bin212926	H3K27me3_true
chr1	85081800	85082000	bin325368	H3K27me3_true
chr1	85082000	85082200	bin325369	H3K27me3_true
chr1	85082200	85082400	bin325370	H3K27me3_true
chr1	85082400	85082600	bin325371	H3K27me3_true
chr1	85082600	85082800	bin325372	H3K27me3_true
chr1	85082800	85083000	bin325373	H3K27me3_true
chr1	85083000	85083200	bin325374	H3K27me3_true
chr1	89363000	89363200	bin341793	H3K27me3_true
chr1	89363200	89363400	bin341794	H3K27me3_true
chr1	89363400	89363600	bin341795	H3K27me3_true
chr1	89364600	89364800	bin341801	H3K27me3_true
chr1	111828600	111828800	bin427644	H3K27me3_true
chr1	111828800	111829000	bin427645	H3K27me3_true
chr1	111829000	111829200	bin427646	H3K27me3_true
chr1	111829200	111829400	bin427647	H3K27me3_true
chr1	111829400	111829600	bin427648	H3K27me3_true
chr1	111829600	111829800	bin427649	H3K27me3_true
chr1	111829800	111830000	bin427650	H3K27me3_true
chr1	111830000	111830200	bin427651	H3K27me3_true
chr1	168492600	168492800	bin531744	H3K27me3_true
chr1	168492800	168493000	bin531745	H3K27me3_true
chr1	168493000	168493200	bin531746	H3K27me3_true
chr1	168493200	168493400	bin531747	H3K27me3_true
chr1	168493400	168493600	bin531748	H3K27me3_true
chr1	168493600	168493800	bin531749	H3K27me3_true
chr1	235852400	235852600	bin795905	H3K27me3_true
chr1	235852600	235852800	bin795906	H3K27me3_true
chr1	235852800	235853000	bin795907	H3K27me3_true
chr1	235853000	235853200	bin795908	H3K27me3_true
chr1	235853200	235853400	bin795909	H3K27me3_true
chr1	235853400	235853600	bin795910	H3K27me3_true
chr1	235853600	235853800	bin795911	H3K27me3_true
chr1	235853800	235854000	bin795912	H3K27me3_true
chr1	235854000	235854200	bin795913	H3K27me3_true
chr1	235854200	235854400	bin795914	H3K27me3_true
chr10	12971200	12971400	bin7140897	H3K27me3_true
chr10	12971400	12971600	bin7140898	H3K27me3_true
chr10	12971600	12971800	bin7140899	H3K27me3_true
chr10	12971800	12972000	bin7140900	H3K27me3_true
chr10	47076600	47076800	bin7244196	H3K27me3_true
chr10	47076800	47077000	bin7244197	H3K27me3_true
chr10	113619600	113619800	bin7499144	H3K27me3_true
chr10	113619800	113620000	bin7499145	H3K27me3_true
chr10	113620000	113620200	bin7499146	H3K27me3_true
chr10	113620200	113620400	bin7499147	H3K27me3_true
chr10	113620400	113620600	bin7499148	H3K27me3_true
chr10	113620600	113620800	bin7499149	H3K27me3_true
chr10	113620800	113621000	bin7499150	H3K27me3_true
chr10	113621000	113621200	bin7499151	H3K27me3_true
chr10	113621200	113621400	bin7499152	H3K27me3_true
chr10	113621400	113621600	bin7499153	H3K27me3_true
chr10	113621600	113621800	bin7499154	H3K27me3_true
chr10	113621800	113622000	bin7499155	H3K27me3_true
chr10	113622000	113622200	bin7499156	H3K27me3_true
chr10	114180800	114181000	bin7501538	H3K27me3_true
chr10	114181000	114181200	bin7501539	H3K27me3_true
chr10	114181200	114181400	bin7501540	H3K27me3_true
chr10	114181400	114181600	bin7501541	H3K27me3_true
chr10	114181800	114182000	bin7501542	H3K27me3_true
chr10	114182000	114182200	bin7501543	H3K27me3_true
chr10	121565800	121566000	bin7532313	H3K27me3_true
chr10	121566000	121566200	bin7532314	H3K27me3_true
chr10	121566200	121566400	bin7532315	H3K27me3_true
chr10	121566400	121566600	bin7532316	H3K27me3_true
chr10	121566600	121566800	bin7532317	H3K27me3_true
chr10	121566800	121567000	bin7532318	H3K27me3_true
chr10	121567000	121567200	bin7532319	H3K27me3_true
chr10	123867800	123868000	bin7542007	H3K27me3_true
chr10	123868000	123868200	bin7542008	H3K27me3_true
chr10	123868200	123868400	bin7542009	H3K27me3_true
chr10	123868400	123868600	bin7542010	H3K27me3_true
chr10	126107200	126107400	bin7551260	H3K27me3_true
chr10	131230000	131230200	bin7573794	H3K27me3_true
chr10	131230200	131230400	bin7573795	H3K27me3_true
chr10	131230400	131230600	bin7573796	H3K27me3_true
chr10	131230600	131230800	bin7573797	H3K27me3_true
chr10	131230800	131231000	bin7573798	H3K27me3_true
chr10	131231000	131231200	bin7573799	H3K27me3_true
chr10	131231200	131231400	bin7573800	H3K27me3_true
chr10	131239600	131239800	bin7573841	H3K27me3_true
chr10	131239800	131240000	bin7573842	H3K27me3_true
chr10	131240000	131240200	bin7573843	H3K27me3_true
chr10	131240200	131240400	bin7573844	H3K27me3_true
chr11	78683800	78684000	bin6864994	H3K27me3_true
chr11	78684000	78684200	bin6864995	H3K27me3_true
chr11	79243400	79243600	bin6867498	H3K27me3_true
chr11	79243600	79243800	bin6867499	H3K27me3_true
chr11	79243800	79244000	bin6867500	H3K27me3_true
chr11	79244000	79244200	bin6867501	H3K27me3_true
chr11	79244200	79244400	bin6867502	H3K27me3_true
chr11	79244400	79244600	bin6867503	H3K27me3_true
chr11	79244600	79244800	bin6867504	H3K27me3_true
chr11	111522000	111522200	bin6988823	H3K27me3_true
chr11	111522200	111522400	bin6988824	H3K27me3_true
chr11	111522400	111522600	bin6988825	H3K27me3_true
chr11	111522600	111522800	bin6988826	H3K27me3_true
chr11	111522800	111523000	bin6988827	H3K27me3_true
chr11	111523000	111523200	bin6988828	H3K27me3_true
chr11	111523400	111523600	bin6988829	H3K27me3_true
chr11	111523600	111523800	bin6988830	H3K27me3_true
chr11	111523800	111524000	bin6988831	H3K27me3_true
chr11	111524000	111524200	bin6988832	H3K27me3_true
chr11	112960200	112960400	bin6994760	H3K27me3_true
chr11	112960400	112960600	bin6994761	H3K27me3_true
chr11	112960600	112960800	bin6994762	H3K27me3_true
chr11	112960800	112961000	bin6994763	H3K27me3_true
chr11	112961000	112961200	bin6994764	H3K27me3_true
chr11	112961200	112961400	bin6994765	H3K27me3_true
chr11	112961400	112961600	bin6994766	H3K27me3_true
chr11	112961600	112961800	bin6994767	H3K27me3_true
chr11	112961800	112962000	bin6994768	H3K27me3_true
chr11	112962000	112962200	bin6994769	H3K27me3_true
chr11	112962200	112962400	bin6994770	H3K27me3_true
chr11	112962400	112962600	bin6994771	H3K27me3_true
chr11	112962600	112962800	bin6994772	H3K27me3_true
chr11	112962800	112963000	bin6994773	H3K27me3_true
chr11	128889600	128889800	bin7061145	H3K27me3_true
chr11	128889800	128890000	bin7061146	H3K27me3_true
chr11	128890000	128890200	bin7061147	H3K27me3_true
chr11	128890200	128890400	bin7061148	H3K27me3_true
chr11	128890400	128890600	bin7061149	H3K27me3_true
chr11	128890600	128890800	bin7061150	H3K27me3_true
chr11	128890800	128891000	bin7061151	H3K27me3_true
chr11	128891000	128891200	bin7061152	H3K27me3_true
chr11	128891200	128891400	bin7061153	H3K27me3_true
chr11	128891400	128891600	bin7061154	H3K27me3_true
chr12	4369600	4369800	bin7601235	H3K27me3_true
chr12	4369800	4370000	bin7601236	H3K27me3_true
chr12	4370000	4370200	bin7601237	H3K27me3_true
chr12	4370200	4370400	bin7601238	H3K27me3_true
chr12	4370400	4370600	bin7601239	H3K27me3_true
chr12	4370600	4370800	bin7601240	H3K27me3_true
chr12	4370800	4371000	bin7601241	H3K27me3_true
chr12	4372600	4372800	bin7601249	H3K27me3_true
chr12	4372800	4373000	bin7601250	H3K27me3_true
chr12	4373000	4373200	bin7601251	H3K27me3_true
chr12	4373200	4373400	bin7601252	H3K27me3_true
chr12	4373400	4373600	bin7601253	H3K27me3_true
chr12	4373600	4373800	bin7601254	H3K27me3_true
chr12	4373800	4374000	bin7601255	H3K27me3_true
chr12	4374000	4374200	bin7601256	H3K27me3_true
chr12	4374600	4374800	bin7601258	H3K27me3_true
chr12	4374800	4375000	bin7601259	H3K27me3_true
chr12	4375000	4375200	bin7601260	H3K27me3_true
chr12	4375200	4375400	bin7601261	H3K27me3_true
chr12	4375400	4375600	bin7601262	H3K27me3_true
chr12	4375600	4375800	bin7601263	H3K27me3_true
chr12	4375800	4376000	bin7601264	H3K27me3_true
chr12	4379400	4379600	bin7601281	H3K27me3_true
chr12	4379600	4379800	bin7601282	H3K27me3_true
chr12	4379800	4380000	bin7601283	H3K27me3_true
chr12	4380000	4380200	bin7601284	H3K27me3_true
chr12	4380200	4380400	bin7601285	H3K27me3_true
chr12	4380400	4380600	bin7601286	H3K27me3_true
chr12	24228600	24228800	bin7674081	H3K27me3_true
chr12	24228800	24229000	bin7674082	H3K27me3_true
chr12	24229000	24229200	bin7674083	H3K27me3_true
chr12	24229200	24229400	bin7674084	H3K27me3_true
chr12	24229400	24229600	bin7674085	H3K27me3_true
chr12	24229600	24229800	bin7674086	H3K27me3_true
chr12	26222200	26222400	bin7682137	H3K27me3_true
chr12	26222400	26222600	bin7682138	H3K27me3_true
chr12	26222600	26222800	bin7682139	H3K27me3_true
chr12	26222800	26223000	bin7682140	H3K27me3_true
chr12	26223000	26223200	bin7682141	H3K27me3_true
chr12	26223200	26223400	bin7682142	H3K27me3_true
chr12	26223400	26223600	bin7682143	H3K27me3_true
chr12	26223600	26223800	bin7682144	H3K27me3_true
chr12	26223800	26224000	bin7682145	H3K27me3_true
chr12	26224000	26224200	bin7682146	H3K27me3_true
chr12	26224200	26224400	bin7682147	H3K27me3_true
chr12	26224400	26224600	bin7682148	H3K27me3_true
chr12	26224600	26224800	bin7682149	H3K27me3_true
chr12	45049800	45050000	bin7736807	H3K27me3_true
chr12	45050000	45050200	bin7736808	H3K27me3_true
chr12	45050200	45050400	bin7736809	H3K27me3_true
chr12	45050400	45050600	bin7736810	H3K27me3_true
chr12	45050600	45050800	bin7736811	H3K27me3_true
chr12	45050800	45051000	bin7736812	H3K27me3_true
chr12	45051000	45051200	bin7736813	H3K27me3_true
chr12	45051200	45051400	bin7736814	H3K27me3_true
chr12	45051400	45051600	bin7736815	H3K27me3_true
chr12	45051600	45051800	bin7736816	H3K27me3_true
chr12	45051800	45052000	bin7736817	H3K27me3_true
chr12	45052000	45052200	bin7736818	H3K27me3_true
chr12	63815800	63816000	bin7805470	H3K27me3_true
chr12	63816000	63816200	bin7805471	H3K27me3_true
chr12	63816200	63816400	bin7805472	H3K27me3_true
chr12	65823400	65823600	bin7813347	H3K27me3_true
chr12	65823600	65823800	bin7813348	H3K27me3_true
chr12	65823800	65824000	bin7813349	H3K27me3_true
chr12	65824000	65824200	bin7813350	H3K27me3_true
chr12	65824200	65824400	bin7813351	H3K27me3_true
chr12	65824400	65824600	bin7813352	H3K27me3_true
chr12	65824600	65824800	bin7813353	H3K27me3_true
chr12	65824800	65825000	bin7813354	H3K27me3_true
chr12	65825000	65825200	bin7813355	H3K27me3_true
chr12	65825200	65825400	bin7813356	H3K27me3_true
chr12	65825400	65825600	bin7813357	H3K27me3_true
chr12	65825600	65825800	bin7813358	H3K27me3_true
chr12	65825800	65826000	bin7813359	H3K27me3_true
chr12	65826000	65826200	bin7813360	H3K27me3_true
chr12	65826200	65826400	bin7813361	H3K27me3_true
chr12	65826400	65826600	bin7813362	H3K27me3_true
chr12	65960000	65960200	bin7813975	H3K27me3_true
chr12	65960200	65960400	bin7813976	H3K27me3_true
chr12	65960400	65960600	bin7813977	H3K27me3_true
chr12	65960600	65960800	bin7813978	H3K27me3_true
chr12	65960800	65961000	bin7813979	H3K27me3_true
chr12	65961000	65961200	bin7813980	H3K27me3_true
chr12	65961200	65961400	bin7813981	H3K27me3_true
chr12	65961400	65961600	bin7813982	H3K27me3_true
chr12	65961600	65961800	bin7813983	H3K27me3_true
chr12	65961800	65962000	bin7813984	H3K27me3_true
chr12	65962000	65962200	bin7813985	H3K27me3_true
chr12	65962200	65962400	bin7813986	H3K27me3_true
chr12	65962400	65962600	bin7813987	H3K27me3_true
chr12	65962600	65962800	bin7813988	H3K27me3_true
chr12	95671600	95671800	bin7932331	H3K27me3_true
chr12	95671800	95672000	bin7932332	H3K27me3_true
chr12	95672000	95672200	bin7932333	H3K27me3_true
chr12	95672200	95672400	bin7932334	H3K27me3_true
chr12	128311800	128312000	bin8061126	H3K27me3_true
chr13	24307200	24307400	bin8098234	H3K27me3_true
chr13	24307400	24307600	bin8098235	H3K27me3_true
chr13	24308000	24308200	bin8098236	H3K27me3_true
chr13	24308200	24308400	bin8098237	H3K27me3_true
chr13	24309600	24309800	bin8098238	H3K27me3_true
chr13	26046400	26046600	bin8103914	H3K27me3_true
chr13	26046600	26046800	bin8103915	H3K27me3_true
chr13	26046800	26047000	bin8103916	H3K27me3_true
chr13	26047000	26047200	bin8103917	H3K27me3_true
chr13	26047200	26047400	bin8103918	H3K27me3_true
chr13	26047400	26047600	bin8103919	H3K27me3_true
chr13	26047600	26047800	bin8103920	H3K27me3_true
chr13	26047800	26048000	bin8103921	H3K27me3_true
chr13	26048000	26048200	bin8103922	H3K27me3_true
chr13	26048200	26048400	bin8103923	H3K27me3_true
chr13	26048400	26048600	bin8103924	H3K27me3_true
chr13	26048600	26048800	bin8103925	H3K27me3_true
chr13	26048800	26049000	bin8103926	H3K27me3_true
chr13	26049000	26049200	bin8103927	H3K27me3_true
chr13	26049200	26049400	bin8103928	H3K27me3_true
chr13	26049400	26049600	bin8103929	H3K27me3_true
chr13	26049600	26049800	bin8103930	H3K27me3_true
chr13	26049800	26050000	bin8103931	H3K27me3_true
chr13	26050000	26050200	bin8103932	H3K27me3_true
chr13	26050200	26050400	bin8103933	H3K27me3_true
chr13	26050400	26050600	bin8103934	H3K27me3_true
chr13	26050600	26050800	bin8103935	H3K27me3_true
chr13	26050800	26051000	bin8103936	H3K27me3_true
chr13	26051000	26051200	bin8103937	H3K27me3_true
chr13	26051200	26051400	bin8103938	H3K27me3_true
chr13	26051400	26051600	bin8103939	H3K27me3_true
chr13	26758600	26758800	bin8106741	H3K27me3_true
chr13	26758800	26759000	bin8106742	H3K27me3_true
chr13	26759000	26759200	bin8106743	H3K27me3_true
chr13	26759200	26759400	bin8106744	H3K27me3_true
chr13	26759400	26759600	bin8106745	H3K27me3_true
chr13	26759600	26759800	bin8106746	H3K27me3_true
chr13	26759800	26760000	bin8106747	H3K27me3_true
chr13	26760000	26760200	bin8106748	H3K27me3_true
chr13	26760200	26760400	bin8106749	H3K27me3_true
chr13	26760400	26760600	bin8106750	H3K27me3_true
chr13	26760600	26760800	bin8106751	H3K27me3_true
chr13	26760800	26761000	bin8106752	H3K27me3_true
chr13	26761000	26761200	bin8106753	H3K27me3_true
chr13	26761200	26761400	bin8106754	H3K27me3_true
chr13	26761400	26761600	bin8106755	H3K27me3_true
chr13	26761600	26761800	bin8106756	H3K27me3_true
chr13	26761800	26762000	bin8106757	H3K27me3_true
chr13	26762000	26762200	bin8106758	H3K27me3_true
chr13	26762200	26762400	bin8106759	H3K27me3_true
chr13	28068800	28069000	bin8112197	H3K27me3_true
chr13	28069000	28069200	bin8112198	H3K27me3_true
chr13	28070000	28070200	bin8112202	H3K27me3_true
chr13	33024400	33024600	bin8132115	H3K27me3_true
chr13	33024600	33024800	bin8132116	H3K27me3_true
chr13	33024800	33025000	bin8132117	H3K27me3_true
chr13	42574000	42574200	bin8169749	H3K27me3_true
chr13	42574200	42574400	bin8169750	H3K27me3_true
chr13	42574400	42574600	bin8169751	H3K27me3_true
chr13	42574600	42574800	bin8169752	H3K27me3_true
chr13	42574800	42575000	bin8169753	H3K27me3_true
chr13	42575000	42575200	bin8169754	H3K27me3_true
chr13	110199600	110199800	bin8443105	H3K27me3_true
chr13	110199800	110200000	bin8443106	H3K27me3_true
chr13	110200000	110200200	bin8443107	H3K27me3_true
chr13	110200200	110200400	bin8443108	H3K27me3_true
chr13	110200400	110200600	bin8443109	H3K27me3_true
chr13	110200600	110200800	bin8443110	H3K27me3_true
chr13	110200800	110201000	bin8443111	H3K27me3_true
chr13	110201000	110201200	bin8443112	H3K27me3_true
chr13	110201200	110201400	bin8443113	H3K27me3_true
chr13	110201400	110201600	bin8443114	H3K27me3_true
chr13	110201600	110201800	bin8443115	H3K27me3_true
chr13	110206200	110206400	bin8443135	H3K27me3_true
chr13	110208000	110208200	bin8443144	H3K27me3_true
chr13	110208200	110208400	bin8443145	H3K27me3_true
chr13	110218400	110218600	bin8443195	H3K27me3_true
chr13	110218600	110218800	bin8443196	H3K27me3_true
chr13	110218800	110219000	bin8443197	H3K27me3_true
chr14	33708000	33708200	bin8511749	H3K27me3_true
chr14	33708200	33708400	bin8511750	H3K27me3_true
chr14	33708400	33708600	bin8511751	H3K27me3_true
chr14	33708600	33708800	bin8511752	H3K27me3_true
chr14	33708800	33709000	bin8511753	H3K27me3_true
chr14	33709000	33709200	bin8511754	H3K27me3_true
chr14	33709200	33709400	bin8511755	H3K27me3_true
chr14	33709400	33709600	bin8511756	H3K27me3_true
chr14	33709600	33709800	bin8511757	H3K27me3_true
chr14	33709800	33710000	bin8511758	H3K27me3_true
chr14	33710000	33710200	bin8511759	H3K27me3_true
chr14	33710200	33710400	bin8511760	H3K27me3_true
chr14	33710400	33710600	bin8511761	H3K27me3_true
chr14	64566400	64566600	bin8628647	H3K27me3_true
chr14	64566600	64566800	bin8628648	H3K27me3_true
chr14	64566800	64567000	bin8628649	H3K27me3_true
chr14	90071800	90072000	bin8731479	H3K27me3_true
chr14	90072000	90072200	bin8731480	H3K27me3_true
chr14	90072200	90072400	bin8731481	H3K27me3_true
chr14	90072400	90072600	bin8731482	H3K27me3_true
chr14	90072600	90072800	bin8731483	H3K27me3_true
chr14	99198400	99198600	bin8769532	H3K27me3_true
chr14	99198600	99198800	bin8769533	H3K27me3_true
chr14	99198800	99199000	bin8769534	H3K27me3_true
chr15	23638800	23639000	bin8797772	H3K27me3_true
chr15	23639000	23639200	bin8797773	H3K27me3_true
chr15	23639200	23639400	bin8797774	H3K27me3_true
chr15	23639400	23639600	bin8797775	H3K27me3_true
chr15	23639600	23639800	bin8797776	H3K27me3_true
chr15	23639800	23640000	bin8797777	H3K27me3_true
chr15	23640000	23640200	bin8797778	H3K27me3_true
chr15	25657400	25657600	bin8803410	H3K27me3_true
chr15	25657600	25657800	bin8803411	H3K27me3_true
chr15	25657800	25658000	bin8803412	H3K27me3_true
chr15	25658000	25658200	bin8803413	H3K27me3_true
chr15	25658200	25658400	bin8803414	H3K27me3_true
chr15	25658400	25658600	bin8803415	H3K27me3_true
chr15	25658600	25658800	bin8803416	H3K27me3_true
chr15	25658800	25659000	bin8803417	H3K27me3_true
chr15	25659200	25659400	bin8803418	H3K27me3_true
chr15	25659400	25659600	bin8803419	H3K27me3_true
chr15	25659600	25659800	bin8803420	H3K27me3_true
chr15	25659800	25660000	bin8803421	H3K27me3_true
chr15	25660000	25660200	bin8803422	H3K27me3_true
chr15	27573800	27574000	bin8811330	H3K27me3_true
chr15	27574000	27574200	bin8811331	H3K27me3_true
chr15	27574200	27574400	bin8811332	H3K27me3_true
chr15	27574400	27574600	bin8811333	H3K27me3_true
chr15	27574600	27574800	bin8811334	H3K27me3_true
chr15	29239400	29239600	bin8815374	H3K27me3_true
chr15	29239600	29239800	bin8815375	H3K27me3_true
chr15	29239800	29240000	bin8815376	H3K27me3_true
chr15	29240000	29240200	bin8815377	H3K27me3_true
chr15	29240600	29240800	bin8815378	H3K27me3_true
chr15	29360400	29360600	bin8815881	H3K27me3_true
chr15	29360600	29360800	bin8815882	H3K27me3_true
chr15	29360800	29361000	bin8815883	H3K27me3_true
chr15	29361000	29361200	bin8815884	H3K27me3_true
chr15	29361200	29361400	bin8815885	H3K27me3_true
chr15	29361400	29361600	bin8815886	H3K27me3_true
chr15	29361600	29361800	bin8815887	H3K27me3_true
chr15	29361800	29362000	bin8815888	H3K27me3_true
chr15	29362000	29362200	bin8815889	H3K27me3_true
chr15	29935800	29936000	bin8818160	H3K27me3_true
chr15	31201200	31201400	bin8819994	H3K27me3_true
chr15	31201400	31201600	bin8819995	H3K27me3_true
chr15	31201600	31201800	bin8819996	H3K27me3_true
chr15	31201800	31202000	bin8819997	H3K27me3_true
chr15	31202000	31202200	bin8819998	H3K27me3_true
chr15	31202200	31202400	bin8819999	H3K27me3_true
chr15	31202400	31202600	bin8820000	H3K27me3_true
chr15	31202600	31202800	bin8820001	H3K27me3_true
chr15	31202800	31203000	bin8820002	H3K27me3_true
chr15	31203000	31203200	bin8820003	H3K27me3_true
chr15	31203200	31203400	bin8820004	H3K27me3_true
chr15	31203400	31203600	bin8820005	H3K27me3_true
chr15	57453400	57453600	bin8917394	H3K27me3_true
chr15	57453600	57453800	bin8917395	H3K27me3_true
chr15	57453800	57454000	bin8917396	H3K27me3_true
chr15	95301000	95301200	bin9064317	H3K27me3_true
chr15	95301200	95301400	bin9064318	H3K27me3_true
chr15	95301400	95301600	bin9064319	H3K27me3_true
chr15	95301600	95301800	bin9064320	H3K27me3_true
chr15	95301800	95302000	bin9064321	H3K27me3_true
chr15	95325800	95326000	bin9064426	H3K27me3_true
chr15	95326000	95326200	bin9064427	H3K27me3_true
chr16	55832600	55832800	bin9236723	H3K27me3_true
chr16	55832800	55833000	bin9236724	H3K27me3_true
chr16	55833400	55833600	bin9236725	H3K27me3_true
chr16	55833600	55833800	bin9236726	H3K27me3_true
chr16	73402800	73403000	bin9304241	H3K27me3_true
chr16	73403000	73403200	bin9304242	H3K27me3_true
chr16	73403200	73403400	bin9304243	H3K27me3_true
chr16	73403400	73403600	bin9304244	H3K27me3_true
chr16	73403600	73403800	bin9304245	H3K27me3_true
chr16	74206000	74206200	bin9307717	H3K27me3_true
chr16	74206200	74206400	bin9307718	H3K27me3_true
chr16	74206400	74206600	bin9307719	H3K27me3_true
chr16	74206800	74207000	bin9307720	H3K27me3_true
chr16	74207000	74207200	bin9307721	H3K27me3_true
chr16	74207200	74207400	bin9307722	H3K27me3_true
chr17	10757000	10757200	bin9412264	H3K27me3_true
chr17	10757200	10757400	bin9412265	H3K27me3_true
chr17	10757400	10757600	bin9412266	H3K27me3_true
chr17	10757600	10757800	bin9412267	H3K27me3_true
chr17	12752600	12752800	bin9420635	H3K27me3_true
chr17	12752800	12753000	bin9420636	H3K27me3_true
chr17	12753000	12753200	bin9420637	H3K27me3_true
chr17	67054000	67054200	bin9587307	H3K27me3_true
chr17	67054200	67054400	bin9587308	H3K27me3_true
chr17	67054400	67054600	bin9587309	H3K27me3_true
chr17	67055000	67055200	bin9587310	H3K27me3_true
chr17	67055200	67055400	bin9587311	H3K27me3_true
chr17	67055400	67055600	bin9587312	H3K27me3_true
chr17	67055800	67056000	bin9587313	H3K27me3_true
chr17	67056000	67056200	bin9587314	H3K27me3_true
chr17	72120800	72121000	bin9606673	H3K27me3_true
chr17	72121000	72121200	bin9606674	H3K27me3_true
chr17	72121200	72121400	bin9606675	H3K27me3_true
chr17	72121400	72121600	bin9606676	H3K27me3_true
chr17	72121800	72122000	bin9606677	H3K27me3_true
chr18	7230200	7230400	bin9679455	H3K27me3_true
chr18	7230400	7230600	bin9679456	H3K27me3_true
chr18	7230600	7230800	bin9679457	H3K27me3_true
chr18	7230800	7231000	bin9679458	H3K27me3_true
chr18	7231000	7231200	bin9679459	H3K27me3_true
chr18	7231200	7231400	bin9679460	H3K27me3_true
chr18	7231400	7231600	bin9679461	H3K27me3_true
chr18	7231600	7231800	bin9679462	H3K27me3_true
chr18	7231800	7232000	bin9679463	H3K27me3_true
chr18	7232000	7232200	bin9679464	H3K27me3_true
chr18	7232200	7232400	bin9679465	H3K27me3_true
chr18	7232400	7232600	bin9679466	H3K27me3_true
chr18	13825200	13825400	bin9704607	H3K27me3_true
chr18	13825400	13825600	bin9704608	H3K27me3_true
chr18	13825600	13825800	bin9704609	H3K27me3_true
chr18	13825800	13826000	bin9704610	H3K27me3_true
chr18	13826000	13826200	bin9704611	H3K27me3_true
chr18	13826200	13826400	bin9704612	H3K27me3_true
chr18	13826400	13826600	bin9704613	H3K27me3_true
chr18	13826600	13826800	bin9704614	H3K27me3_true
chr18	13826800	13827000	bin9704615	H3K27me3_true
chr18	23878600	23878800	bin9717089	H3K27me3_true
chr18	23878800	23879000	bin9717090	H3K27me3_true
chr18	23879000	23879200	bin9717091	H3K27me3_true
chr18	23879200	23879400	bin9717092	H3K27me3_true
chr18	23879400	23879600	bin9717093	H3K27me3_true
chr18	23879600	23879800	bin9717094	H3K27me3_true
chr18	23879800	23880000	bin9717095	H3K27me3_true
chr18	23880000	23880200	bin9717096	H3K27me3_true
chr18	58967200	58967400	bin9863473	H3K27me3_true
chr18	58967400	58967600	bin9863474	H3K27me3_true
chr18	58967600	58967800	bin9863475	H3K27me3_true
chr18	58967800	58968000	bin9863476	H3K27me3_true
chr18	58968000	58968200	bin9863477	H3K27me3_true
chr18	58968200	58968400	bin9863478	H3K27me3_true
chr18	59219000	59219200	bin9864515	H3K27me3_true
chr18	59219200	59219400	bin9864516	H3K27me3_true
chr18	59219400	59219600	bin9864517	H3K27me3_true
chr18	59219600	59219800	bin9864518	H3K27me3_true
chr18	59219800	59220000	bin9864519	H3K27me3_true
chr18	59220000	59220200	bin9864520	H3K27me3_true
chr18	59220200	59220400	bin9864521	H3K27me3_true
chr18	59220400	59220600	bin9864522	H3K27me3_true
chr18	59220600	59220800	bin9864523	H3K27me3_true
chr18	59220800	59221000	bin9864524	H3K27me3_true
chr18	59221000	59221200	bin9864525	H3K27me3_true
chr18	59221200	59221400	bin9864526	H3K27me3_true
chr18	59221400	59221600	bin9864527	H3K27me3_true
chr18	59221600	59221800	bin9864528	H3K27me3_true
chr18	59221800	59222000	bin9864529	H3K27me3_true
chr18	59222000	59222200	bin9864530	H3K27me3_true
chr18	59222200	59222400	bin9864531	H3K27me3_true
chr18	59513600	59513800	bin9865731	H3K27me3_true
chr19	51009200	51009400	bin10335614	H3K27me3_true
chr19	51009400	51009600	bin10335615	H3K27me3_true
chr19	51009600	51009800	bin10335616	H3K27me3_true
chr19	51009800	51010000	bin10335617	H3K27me3_true
chr19	51010000	51010200	bin10335618	H3K27me3_true
chr19	51010200	51010400	bin10335619	H3K27me3_true
chr19	51010400	51010600	bin10335620	H3K27me3_true
chr19	51010600	51010800	bin10335621	H3K27me3_true
chr2	1739800	1740000	bin850677	H3K27me3_true
chr2	1740000	1740200	bin850678	H3K27me3_true
chr2	1740200	1740400	bin850679	H3K27me3_true
chr2	1740400	1740600	bin850680	H3K27me3_true
chr2	1740600	1740800	bin850681	H3K27me3_true
chr2	1740800	1741000	bin850682	H3K27me3_true
chr2	1859800	1860000	bin851194	H3K27me3_true
chr2	1860000	1860200	bin851195	H3K27me3_true
chr2	1860200	1860400	bin851196	H3K27me3_true
chr2	1860400	1860600	bin851197	H3K27me3_true
chr2	1860600	1860800	bin851198	H3K27me3_true
chr2	1860800	1861000	bin851199	H3K27me3_true
chr2	1874800	1875000	bin851265	H3K27me3_true
chr2	1875000	1875200	bin851266	H3K27me3_true
chr2	1875200	1875400	bin851267	H3K27me3_true
chr2	1875400	1875600	bin851268	H3K27me3_true
chr2	1875600	1875800	bin851269	H3K27me3_true
chr2	1875800	1876000	bin851270	H3K27me3_true
chr2	1876000	1876200	bin851271	H3K27me3_true
chr2	1876200	1876400	bin851272	H3K27me3_true
chr2	1876400	1876600	bin851273	H3K27me3_true
chr2	1876600	1876800	bin851274	H3K27me3_true
chr2	1909600	1909800	bin851425	H3K27me3_true
chr2	1909800	1910000	bin851426	H3K27me3_true
chr2	1910000	1910200	bin851427	H3K27me3_true
chr2	1910200	1910400	bin851428	H3K27me3_true
chr2	1910400	1910600	bin851429	H3K27me3_true
chr2	1910600	1910800	bin851430	H3K27me3_true
chr2	1910800	1911000	bin851431	H3K27me3_true
chr2	1911000	1911200	bin851432	H3K27me3_true
chr2	1911400	1911600	bin851434	H3K27me3_true
chr2	1911600	1911800	bin851435	H3K27me3_true
chr2	1911800	1912000	bin851436	H3K27me3_true
chr2	1912000	1912200	bin851437	H3K27me3_true
chr2	1912200	1912400	bin851438	H3K27me3_true
chr2	1912400	1912600	bin851439	H3K27me3_true
chr2	1912600	1912800	bin851440	H3K27me3_true
chr2	1912800	1913000	bin851441	H3K27me3_true
chr2	1913000	1913200	bin851442	H3K27me3_true
chr2	1913200	1913400	bin851443	H3K27me3_true
chr2	1913400	1913600	bin851444	H3K27me3_true
chr2	1913600	1913800	bin851445	H3K27me3_true
chr2	1913800	1914000	bin851446	H3K27me3_true
chr2	1914200	1914400	bin851447	H3K27me3_true
chr2	1914400	1914600	bin851448	H3K27me3_true
chr2	1914600	1914800	bin851449	H3K27me3_true
chr2	1914800	1915000	bin851450	H3K27me3_true
chr2	1915000	1915200	bin851451	H3K27me3_true
chr2	1915200	1915400	bin851452	H3K27me3_true
chr2	1915400	1915600	bin851453	H3K27me3_true
chr2	1915600	1915800	bin851454	H3K27me3_true
chr2	1915800	1916000	bin851455	H3K27me3_true
chr2	1916000	1916200	bin851456	H3K27me3_true
chr2	1916200	1916400	bin851457	H3K27me3_true
chr2	1916800	1917000	bin851460	H3K27me3_true
chr2	1917000	1917200	bin851461	H3K27me3_true
chr2	1917200	1917400	bin851462	H3K27me3_true
chr2	1917400	1917600	bin851463	H3K27me3_true
chr2	1917600	1917800	bin851464	H3K27me3_true
chr2	3785400	3785600	bin859284	H3K27me3_true
chr2	3785600	3785800	bin859285	H3K27me3_true
chr2	3785800	3786000	bin859286	H3K27me3_true
chr2	60522200	60522400	bin1091001	H3K27me3_true
chr2	60522400	60522600	bin1091002	H3K27me3_true
chr2	60522600	60522800	bin1091003	H3K27me3_true
chr2	66424800	66425000	bin1113446	H3K27me3_true
chr2	66425000	66425200	bin1113447	H3K27me3_true
chr2	66425200	66425400	bin1113448	H3K27me3_true
chr2	66425400	66425600	bin1113449	H3K27me3_true
chr2	66425600	66425800	bin1113450	H3K27me3_true
chr2	66425800	66426000	bin1113451	H3K27me3_true
chr2	66426000	66426200	bin1113452	H3K27me3_true
chr2	66426200	66426400	bin1113453	H3K27me3_true
chr2	66426400	66426600	bin1113454	H3K27me3_true
chr2	66426600	66426800	bin1113455	H3K27me3_true
chr2	66426800	66427000	bin1113456	H3K27me3_true
chr2	66581200	66581400	bin1114204	H3K27me3_true
chr2	66581400	66581600	bin1114205	H3K27me3_true
chr2	66581600	66581800	bin1114206	H3K27me3_true
chr2	66581800	66582000	bin1114207	H3K27me3_true
chr2	66582000	66582200	bin1114208	H3K27me3_true
chr2	66582200	66582400	bin1114209	H3K27me3_true
chr2	66582400	66582600	bin1114210	H3K27me3_true
chr2	66582600	66582800	bin1114211	H3K27me3_true
chr2	66582800	66583000	bin1114212	H3K27me3_true
chr2	66583000	66583200	bin1114213	H3K27me3_true
chr2	66583200	66583400	bin1114214	H3K27me3_true
chr2	66583400	66583600	bin1114215	H3K27me3_true
chr2	66583600	66583800	bin1114216	H3K27me3_true
chr2	66583800	66584000	bin1114217	H3K27me3_true
chr2	102502800	102503000	bin1222437	H3K27me3_true
chr2	102503000	102503200	bin1222438	H3K27me3_true
chr2	102503200	102503400	bin1222439	H3K27me3_true
chr2	102503400	102503600	bin1222440	H3K27me3_true
chr2	102503600	102503800	bin1222441	H3K27me3_true
chr2	102503800	102504000	bin1222442	H3K27me3_true
chr2	102504000	102504200	bin1222443	H3K27me3_true
chr2	132645200	132645400	bin1326670	H3K27me3_true
chr2	132645400	132645600	bin1326671	H3K27me3_true
chr2	132645600	132645800	bin1326672	H3K27me3_true
chr2	132645800	132646000	bin1326673	H3K27me3_true
chr2	132646000	132646200	bin1326674	H3K27me3_true
chr2	132646200	132646400	bin1326675	H3K27me3_true
chr2	132646400	132646600	bin1326676	H3K27me3_true
chr2	210224400	210224600	bin1638455	H3K27me3_true
chr2	210224600	210224800	bin1638456	H3K27me3_true
chr2	210224800	210225000	bin1638457	H3K27me3_true
chr2	210225000	210225200	bin1638458	H3K27me3_true
chr2	210225200	210225400	bin1638459	H3K27me3_true
chr2	233924600	233924800	bin1734495	H3K27me3_true
chr2	233924800	233925000	bin1734496	H3K27me3_true
chr2	233925000	233925200	bin1734497	H3K27me3_true
chr2	233925200	233925400	bin1734498	H3K27me3_true
chr2	233925400	233925600	bin1734499	H3K27me3_true
chr2	233925600	233925800	bin1734500	H3K27me3_true
chr2	233925800	233926000	bin1734501	H3K27me3_true
chr2	233926000	233926200	bin1734502	H3K27me3_true
chr2	233926200	233926400	bin1734503	H3K27me3_true
chr2	233926400	233926600	bin1734504	H3K27me3_true
chr2	233926600	233926800	bin1734505	H3K27me3_true
chr2	233926800	233927000	bin1734506	H3K27me3_true
chr2	233927000	233927200	bin1734507	H3K27me3_true
chr2	233927200	233927400	bin1734508	H3K27me3_true
chr2	233927400	233927600	bin1734509	H3K27me3_true
chr2	236334000	236334200	bin1744891	H3K27me3_true
chr2	236334200	236334400	bin1744892	H3K27me3_true
chr2	236334400	236334600	bin1744893	H3K27me3_true
chr2	236334600	236334800	bin1744894	H3K27me3_true
chr2	236334800	236335000	bin1744895	H3K27me3_true
chr2	236335000	236335200	bin1744896	H3K27me3_true
chr2	236336000	236336200	bin1744901	H3K27me3_true
chr2	236336200	236336400	bin1744902	H3K27me3_true
chr2	236336400	236336600	bin1744903	H3K27me3_true
chr2	236336600	236336800	bin1744904	H3K27me3_true
chr2	236336800	236337000	bin1744905	H3K27me3_true
chr2	236337000	236337200	bin1744906	H3K27me3_true
chr2	236337200	236337400	bin1744907	H3K27me3_true
chr2	236337400	236337600	bin1744908	H3K27me3_true
chr2	239790400	239790600	bin1759851	H3K27me3_true
chr2	239790600	239790800	bin1759852	H3K27me3_true
chr2	239790800	239791000	bin1759853	H3K27me3_true
chr2	239791200	239791400	bin1759854	H3K27me3_true
chr2	239791400	239791600	bin1759855	H3K27me3_true
chr2	239791600	239791800	bin1759856	H3K27me3_true
chr2	239791800	239792000	bin1759857	H3K27me3_true
chr2	239792000	239792200	bin1759858	H3K27me3_true
chr2	239792200	239792400	bin1759859	H3K27me3_true
chr2	239792400	239792600	bin1759860	H3K27me3_true
chr2	239792600	239792800	bin1759861	H3K27me3_true
chr2	239792800	239793000	bin1759862	H3K27me3_true
chr20	9507200	9507400	bin9991053	H3K27me3_true
chr20	9507400	9507600	bin9991054	H3K27me3_true
chr20	9507600	9507800	bin9991055	H3K27me3_true
chr20	9507800	9508000	bin9991056	H3K27me3_true
chr20	9508000	9508200	bin9991057	H3K27me3_true
chr20	9508200	9508400	bin9991058	H3K27me3_true
chr20	9508400	9508600	bin9991059	H3K27me3_true
chr20	9508600	9508800	bin9991060	H3K27me3_true
chr20	9508800	9509000	bin9991061	H3K27me3_true
chr20	9509000	9509200	bin9991062	H3K27me3_true
chr20	9509200	9509400	bin9991063	H3K27me3_true
chr20	19990000	19990200	bin10034605	H3K27me3_true
chr20	19990200	19990400	bin10034606	H3K27me3_true
chr20	19990400	19990600	bin10034607	H3K27me3_true
chr20	19990600	19990800	bin10034608	H3K27me3_true
chr20	19990800	19991000	bin10034609	H3K27me3_true
chr20	25077200	25077400	bin10054614	H3K27me3_true
chr20	25077400	25077600	bin10054615	H3K27me3_true
chr20	25077600	25077800	bin10054616	H3K27me3_true
chr20	25077800	25078000	bin10054617	H3K27me3_true
chr20	42359200	42359400	bin10101042	H3K27me3_true
chr20	42359400	42359600	bin10101043	H3K27me3_true
chr20	42359600	42359800	bin10101044	H3K27me3_true
chr20	42359800	42360000	bin10101045	H3K27me3_true
chr20	42360000	42360200	bin10101046	H3K27me3_true
chr20	42360200	42360400	bin10101047	H3K27me3_true
chr20	42360400	42360600	bin10101048	H3K27me3_true
chr20	42360600	42360800	bin10101049	H3K27me3_true
chr20	42360800	42361000	bin10101050	H3K27me3_true
chr20	42361000	42361200	bin10101051	H3K27me3_true
chr20	42361200	42361400	bin10101052	H3K27me3_true
chr20	42361400	42361600	bin10101053	H3K27me3_true
chr20	45479800	45480000	bin10113913	H3K27me3_true
chr20	45480000	45480200	bin10113914	H3K27me3_true
chr20	46457600	46457800	bin10117602	H3K27me3_true
chr20	46457800	46458000	bin10117603	H3K27me3_true
chr20	46458000	46458200	bin10117604	H3K27me3_true
chr20	46458200	46458400	bin10117605	H3K27me3_true
chr20	46458400	46458600	bin10117606	H3K27me3_true
chr20	46458600	46458800	bin10117607	H3K27me3_true
chr20	46458800	46459000	bin10117608	H3K27me3_true
chr20	46459000	46459200	bin10117609	H3K27me3_true
chr20	46459200	46459400	bin10117610	H3K27me3_true
chr20	51851200	51851400	bin10138524	H3K27me3_true
chr20	51851400	51851600	bin10138525	H3K27me3_true
chr20	59219800	59220000	bin10169475	H3K27me3_true
chr20	59222800	59223000	bin10169490	H3K27me3_true
chr20	59223000	59223200	bin10169491	H3K27me3_true
chr20	59223200	59223400	bin10169492	H3K27me3_true
chr20	59223400	59223600	bin10169493	H3K27me3_true
chr20	59223600	59223800	bin10169494	H3K27me3_true
chr20	59223800	59224000	bin10169495	H3K27me3_true
chr20	59224000	59224200	bin10169496	H3K27me3_true
chr20	59224200	59224400	bin10169497	H3K27me3_true
chr20	59224400	59224600	bin10169498	H3K27me3_true
chr21	17521600	17521800	bin10515621	H3K27me3_true
chr21	17522400	17522600	bin10515624	H3K27me3_true
chr21	17522600	17522800	bin10515625	H3K27me3_true
chr21	17522800	17523000	bin10515626	H3K27me3_true
chr21	17523000	17523200	bin10515627	H3K27me3_true
chr21	17523200	17523400	bin10515628	H3K27me3_true
chr21	38347200	38347400	bin10599272	H3K27me3_true
chr21	38347400	38347600	bin10599273	H3K27me3_true
chr21	38347600	38347800	bin10599274	H3K27me3_true
chr21	38347800	38348000	bin10599275	H3K27me3_true
chr21	38348000	38348200	bin10599276	H3K27me3_true
chr21	38348200	38348400	bin10599277	H3K27me3_true
chr21	38348400	38348600	bin10599278	H3K27me3_true
chr21	38348600	38348800	bin10599279	H3K27me3_true
chr21	38350400	38350600	bin10599288	H3K27me3_true
chr21	38350600	38350800	bin10599289	H3K27me3_true
chr21	38350800	38351000	bin10599290	H3K27me3_true
chr21	38351000	38351200	bin10599291	H3K27me3_true
chr22	26168200	26168400	bin10405348	H3K27me3_true
chr22	26168400	26168600	bin10405349	H3K27me3_true
chr22	26168600	26168800	bin10405350	H3K27me3_true
chr22	26168800	26169000	bin10405351	H3K27me3_true
chr22	26169000	26169200	bin10405352	H3K27me3_true
chr22	26169200	26169400	bin10405353	H3K27me3_true
chr22	26169400	26169600	bin10405354	H3K27me3_true
chr22	26169600	26169800	bin10405355	H3K27me3_true
chr22	26169800	26170000	bin10405356	H3K27me3_true
chr22	26170000	26170200	bin10405357	H3K27me3_true
chr22	26170200	26170400	bin10405358	H3K27me3_true
chr22	26170400	26170600	bin10405359	H3K27me3_true
chr22	26170600	26170800	bin10405360	H3K27me3_true
chr3	10815000	10815200	bin1812465	H3K27me3_true
chr3	10815200	10815400	bin1812466	H3K27me3_true
chr3	10815400	10815600	bin1812467	H3K27me3_true
chr3	10815600	10815800	bin1812468	H3K27me3_true
chr3	10815800	10816000	bin1812469	H3K27me3_true
chr3	10816000	10816200	bin1812470	H3K27me3_true
chr3	10816200	10816400	bin1812471	H3K27me3_true
chr3	42936200	42936400	bin1937821	H3K27me3_true
chr3	42936400	42936600	bin1937822	H3K27me3_true
chr3	42936600	42936800	bin1937823	H3K27me3_true
chr3	42936800	42937000	bin1937824	H3K27me3_true
chr3	61677600	61677800	bin2010277	H3K27me3_true
chr3	61677800	61678000	bin2010278	H3K27me3_true
chr3	61678000	61678200	bin2010279	H3K27me3_true
chr3	62873600	62873800	bin2015796	H3K27me3_true
chr3	62873800	62874000	bin2015797	H3K27me3_true
chr3	62874000	62874200	bin2015798	H3K27me3_true
chr3	62874200	62874400	bin2015799	H3K27me3_true
chr3	62874400	62874600	bin2015800	H3K27me3_true
chr3	62874600	62874800	bin2015801	H3K27me3_true
chr3	62874800	62875000	bin2015802	H3K27me3_true
chr3	62875000	62875200	bin2015803	H3K27me3_true
chr3	62875200	62875400	bin2015804	H3K27me3_true
chr3	62875400	62875600	bin2015805	H3K27me3_true
chr3	62875600	62875800	bin2015806	H3K27me3_true
chr3	62875800	62876000	bin2015807	H3K27me3_true
chr3	99637000	99637200	bin2145993	H3K27me3_true
chr3	99637200	99637400	bin2145994	H3K27me3_true
chr3	99637400	99637600	bin2145995	H3K27me3_true
chr3	99637600	99637800	bin2145996	H3K27me3_true
chr3	99637800	99638000	bin2145997	H3K27me3_true
chr3	99638000	99638200	bin2145998	H3K27me3_true
chr3	99638200	99638400	bin2145999	H3K27me3_true
chr3	99638400	99638600	bin2146000	H3K27me3_true
chr3	99638600	99638800	bin2146001	H3K27me3_true
chr3	99638800	99639000	bin2146002	H3K27me3_true
chr3	99639000	99639200	bin2146003	H3K27me3_true
chr3	99639200	99639400	bin2146004	H3K27me3_true
chr3	107910400	107910600	bin2178156	H3K27me3_true
chr3	107910800	107911000	bin2178157	H3K27me3_true
chr3	107911000	107911200	bin2178158	H3K27me3_true
chr3	107911200	107911400	bin2178159	H3K27me3_true
chr3	107911400	107911600	bin2178160	H3K27me3_true
chr3	107911600	107911800	bin2178161	H3K27me3_true
chr3	115808600	115808800	bin2208880	H3K27me3_true
chr3	115808800	115809000	bin2208881	H3K27me3_true
chr3	115809000	115809200	bin2208882	H3K27me3_true
chr3	115809200	115809400	bin2208883	H3K27me3_true
chr3	115809400	115809600	bin2208884	H3K27me3_true
chr3	115809600	115809800	bin2208885	H3K27me3_true
chr3	122260200	122260400	bin2233917	H3K27me3_true
chr3	122260400	122260600	bin2233918	H3K27me3_true
chr3	122260600	122260800	bin2233919	H3K27me3_true
chr3	122260800	122261000	bin2233920	H3K27me3_true
chr3	122261000	122261200	bin2233921	H3K27me3_true
chr3	122261200	122261400	bin2233922	H3K27me3_true
chr3	122261400	122261600	bin2233923	H3K27me3_true
chr3	122261600	122261800	bin2233924	H3K27me3_true
chr3	122261800	122262000	bin2233925	H3K27me3_true
chr3	122262000	122262200	bin2233926	H3K27me3_true
chr3	122262200	122262400	bin2233927	H3K27me3_true
chr3	134011600	134011800	bin2278709	H3K27me3_true
chr3	134011800	134012000	bin2278710	H3K27me3_true
chr3	134012000	134012200	bin2278711	H3K27me3_true
chr3	134017600	134017800	bin2278736	H3K27me3_true
chr3	134017800	134018000	bin2278737	H3K27me3_true
chr3	134018000	134018200	bin2278738	H3K27me3_true
chr3	134018200	134018400	bin2278739	H3K27me3_true
chr3	134018400	134018600	bin2278740	H3K27me3_true
chr3	134018600	134018800	bin2278741	H3K27me3_true
chr3	134018800	134019000	bin2278742	H3K27me3_true
chr3	134019000	134019200	bin2278743	H3K27me3_true
chr3	134019200	134019400	bin2278744	H3K27me3_true
chr3	134019400	134019600	bin2278745	H3K27me3_true
chr3	134019600	134019800	bin2278746	H3K27me3_true
chr3	134019800	134020000	bin2278747	H3K27me3_true
chr3	154427600	154427800	bin2358738	H3K27me3_true
chr3	154427800	154428000	bin2358739	H3K27me3_true
chr3	154428000	154428200	bin2358740	H3K27me3_true
chr3	154428200	154428400	bin2358741	H3K27me3_true
chr3	154428400	154428600	bin2358742	H3K27me3_true
chr3	154428600	154428800	bin2358743	H3K27me3_true
chr3	154428800	154429000	bin2358744	H3K27me3_true
chr3	154429000	154429200	bin2358745	H3K27me3_true
chr3	161371400	161371600	bin2385727	H3K27me3_true
chr3	161371600	161371800	bin2385728	H3K27me3_true
chr3	161371800	161372000	bin2385729	H3K27me3_true
chr3	161372000	161372200	bin2385730	H3K27me3_true
chr3	161372200	161372400	bin2385731	H3K27me3_true
chr3	161372400	161372600	bin2385732	H3K27me3_true
chr3	161372600	161372800	bin2385733	H3K27me3_true
chr3	161372800	161373000	bin2385734	H3K27me3_true
chr3	168248400	168248600	bin2411414	H3K27me3_true
chr3	168248600	168248800	bin2411415	H3K27me3_true
chr3	168248800	168249000	bin2411416	H3K27me3_true
chr3	168249000	168249200	bin2411417	H3K27me3_true
chr3	168249200	168249400	bin2411418	H3K27me3_true
chr3	168249400	168249600	bin2411419	H3K27me3_true
chr3	168249600	168249800	bin2411420	H3K27me3_true
chr3	168249800	168250000	bin2411421	H3K27me3_true
chr3	168250000	168250200	bin2411422	H3K27me3_true
chr3	168250200	168250400	bin2411423	H3K27me3_true
chr3	168250400	168250600	bin2411424	H3K27me3_true
chr3	168250600	168250800	bin2411425	H3K27me3_true
chr4	24843800	24844000	bin2624843	H3K27me3_true
chr4	24844000	24844200	bin2624844	H3K27me3_true
chr4	24844200	24844400	bin2624845	H3K27me3_true
chr4	24844400	24844600	bin2624846	H3K27me3_true
chr4	56680200	56680400	bin2738563	H3K27me3_true
chr4	56680400	56680600	bin2738564	H3K27me3_true
chr4	56680600	56680800	bin2738565	H3K27me3_true
chr4	56680800	56681000	bin2738566	H3K27me3_true
chr4	56681000	56681200	bin2738567	H3K27me3_true
chr4	56681200	56681400	bin2738568	H3K27me3_true
chr4	56681400	56681600	bin2738569	H3K27me3_true
chr4	56681600	56681800	bin2738570	H3K27me3_true
chr4	56681800	56682000	bin2738571	H3K27me3_true
chr4	56682000	56682200	bin2738572	H3K27me3_true
chr4	56682200	56682400	bin2738573	H3K27me3_true
chr4	56682400	56682600	bin2738574	H3K27me3_true
chr4	57194200	57194400	bin2740379	H3K27me3_true
chr4	57194400	57194600	bin2740380	H3K27me3_true
chr4	57194600	57194800	bin2740381	H3K27me3_true
chr4	57194800	57195000	bin2740382	H3K27me3_true
chr4	89306800	89307000	bin2859128	H3K27me3_true
chr4	89307000	89307200	bin2859129	H3K27me3_true
chr4	89307200	89307400	bin2859130	H3K27me3_true
chr4	89307400	89307600	bin2859131	H3K27me3_true
chr4	89307600	89307800	bin2859132	H3K27me3_true
chr4	89307800	89308000	bin2859133	H3K27me3_true
chr4	89308000	89308200	bin2859134	H3K27me3_true
chr4	145902400	145902600	bin3073700	H3K27me3_true
chr4	145902600	145902800	bin3073701	H3K27me3_true
chr4	145902800	145903000	bin3073702	H3K27me3_true
chr4	145903000	145903200	bin3073703	H3K27me3_true
chr4	145904600	145904800	bin3073711	H3K27me3_true
chr4	147480200	147480400	bin3080008	H3K27me3_true
chr4	147480400	147480600	bin3080009	H3K27me3_true
chr4	147480600	147480800	bin3080010	H3K27me3_true
chr4	147480800	147481000	bin3080011	H3K27me3_true
chr4	147481000	147481200	bin3080012	H3K27me3_true
chr4	147481200	147481400	bin3080013	H3K27me3_true
chr4	147481400	147481600	bin3080014	H3K27me3_true
chr4	150191000	150191200	bin3090883	H3K27me3_true
chr4	150191200	150191400	bin3090884	H3K27me3_true
chr4	153728800	153729000	bin3105132	H3K27me3_true
chr4	153729000	153729200	bin3105133	H3K27me3_true
chr4	163342600	163342800	bin3143471	H3K27me3_true
chr4	163342800	163343000	bin3143472	H3K27me3_true
chr4	163343000	163343200	bin3143473	H3K27me3_true
chr4	163343200	163343400	bin3143474	H3K27me3_true
chr4	163343400	163343600	bin3143475	H3K27me3_true
chr4	163343600	163343800	bin3143476	H3K27me3_true
chr4	163343800	163344000	bin3143477	H3K27me3_true
chr4	163344000	163344200	bin3143478	H3K27me3_true
chr4	163344200	163344400	bin3143479	H3K27me3_true
chr4	163344400	163344600	bin3143480	H3K27me3_true
chr4	163344600	163344800	bin3143481	H3K27me3_true
chr4	163344800	163345000	bin3143482	H3K27me3_true
chr4	182625000	182625200	bin3220904	H3K27me3_true
chr4	182625200	182625400	bin3220905	H3K27me3_true
chr4	182625400	182625600	bin3220906	H3K27me3_true
chr4	182625600	182625800	bin3220907	H3K27me3_true
chr4	184017000	184017200	bin3226551	H3K27me3_true
chr4	184017200	184017400	bin3226552	H3K27me3_true
chr4	184017400	184017600	bin3226553	H3K27me3_true
chr5	31193800	31194000	bin3370625	H3K27me3_true
chr5	31194000	31194200	bin3370626	H3K27me3_true
chr5	31194200	31194400	bin3370627	H3K27me3_true
chr5	31194400	31194600	bin3370628	H3K27me3_true
chr5	35988800	35989000	bin3387736	H3K27me3_true
chr5	35989000	35989200	bin3387737	H3K27me3_true
chr5	35989200	35989400	bin3387738	H3K27me3_true
chr5	35989400	35989600	bin3387739	H3K27me3_true
chr5	35989600	35989800	bin3387740	H3K27me3_true
chr5	35990200	35990400	bin3387741	H3K27me3_true
chr5	35990400	35990600	bin3387742	H3K27me3_true
chr5	35991200	35991400	bin3387743	H3K27me3_true
chr5	35991400	35991600	bin3387744	H3K27me3_true
chr5	35991600	35991800	bin3387745	H3K27me3_true
chr5	35991800	35992000	bin3387746	H3K27me3_true
chr5	36606400	36606600	bin3390049	H3K27me3_true
chr5	36606600	36606800	bin3390050	H3K27me3_true
chr5	36606800	36607000	bin3390051	H3K27me3_true
chr5	36607000	36607200	bin3390052	H3K27me3_true
chr5	36608000	36608200	bin3390057	H3K27me3_true
chr5	73899000	73899200	bin3509505	H3K27me3_true
chr5	73899200	73899400	bin3509506	H3K27me3_true
chr5	73899400	73899600	bin3509507	H3K27me3_true
chr5	73899600	73899800	bin3509508	H3K27me3_true
chr5	73909200	73909400	bin3509556	H3K27me3_true
chr5	73909400	73909600	bin3509557	H3K27me3_true
chr5	73909600	73909800	bin3509558	H3K27me3_true
chr5	73909800	73910000	bin3509559	H3K27me3_true
chr5	73910000	73910200	bin3509560	H3K27me3_true
chr5	79030800	79031000	bin3529576	H3K27me3_true
chr5	79031000	79031200	bin3529577	H3K27me3_true
chr5	79031200	79031400	bin3529578	H3K27me3_true
chr5	79031400	79031600	bin3529579	H3K27me3_true
chr5	79031600	79031800	bin3529580	H3K27me3_true
chr5	79031800	79032000	bin3529581	H3K27me3_true
chr5	79032000	79032200	bin3529582	H3K27me3_true
chr5	79032200	79032400	bin3529583	H3K27me3_true
chr5	79032400	79032600	bin3529584	H3K27me3_true
chr5	79032600	79032800	bin3529585	H3K27me3_true
chr5	79032800	79033000	bin3529586	H3K27me3_true
chr5	79033000	79033200	bin3529587	H3K27me3_true
chr5	79033200	79033400	bin3529588	H3K27me3_true
chr5	79033400	79033600	bin3529589	H3K27me3_true
chr5	79033600	79033800	bin3529590	H3K27me3_true
chr5	79033800	79034000	bin3529591	H3K27me3_true
chr5	79034000	79034200	bin3529592	H3K27me3_true
chr5	79034200	79034400	bin3529593	H3K27me3_true
chr5	80558600	80558800	bin3535274	H3K27me3_true
chr5	80558800	80559000	bin3535275	H3K27me3_true
chr5	80559000	80559200	bin3535276	H3K27me3_true
chr5	80559200	80559400	bin3535277	H3K27me3_true
chr5	80559400	80559600	bin3535278	H3K27me3_true
chr5	80559600	80559800	bin3535279	H3K27me3_true
chr5	109884400	109884600	bin3650000	H3K27me3_true
chr5	109884600	109884800	bin3650001	H3K27me3_true
chr5	109884800	109885000	bin3650002	H3K27me3_true
chr5	109885000	109885200	bin3650003	H3K27me3_true
chr5	109885200	109885400	bin3650004	H3K27me3_true
chr5	109885400	109885600	bin3650005	H3K27me3_true
chr5	109885800	109886000	bin3650006	H3K27me3_true
chr5	109886000	109886200	bin3650007	H3K27me3_true
chr5	111459000	111459200	bin3655799	H3K27me3_true
chr5	112418000	112418200	bin3659600	H3K27me3_true
chr5	112418200	112418400	bin3659601	H3K27me3_true
chr5	112418400	112418600	bin3659602	H3K27me3_true
chr5	112418600	112418800	bin3659603	H3K27me3_true
chr5	112418800	112419000	bin3659604	H3K27me3_true
chr5	112419000	112419200	bin3659605	H3K27me3_true
chr5	112419200	112419400	bin3659606	H3K27me3_true
chr5	112419400	112419600	bin3659607	H3K27me3_true
chr5	112419600	112419800	bin3659608	H3K27me3_true
chr5	112419800	112420000	bin3659609	H3K27me3_true
chr5	112420000	112420200	bin3659610	H3K27me3_true
chr5	112420200	112420400	bin3659611	H3K27me3_true
chr5	112420400	112420600	bin3659612	H3K27me3_true
chr5	112420600	112420800	bin3659613	H3K27me3_true
chr5	116050600	116050800	bin3673261	H3K27me3_true
chr5	116050800	116051000	bin3673262	H3K27me3_true
chr5	116051000	116051200	bin3673263	H3K27me3_true
chr5	116051200	116051400	bin3673264	H3K27me3_true
chr5	116051400	116051600	bin3673265	H3K27me3_true
chr5	116051600	116051800	bin3673266	H3K27me3_true
chr5	116051800	116052000	bin3673267	H3K27me3_true
chr5	116052200	116052400	bin3673268	H3K27me3_true
chr5	116052400	116052600	bin3673269	H3K27me3_true
chr5	116052600	116052800	bin3673270	H3K27me3_true
chr5	116052800	116053000	bin3673271	H3K27me3_true
chr5	116053000	116053200	bin3673272	H3K27me3_true
chr5	116057600	116057800	bin3673287	H3K27me3_true
chr5	116057800	116058000	bin3673288	H3K27me3_true
chr5	116058000	116058200	bin3673289	H3K27me3_true
chr5	116058200	116058400	bin3673290	H3K27me3_true
chr5	116058400	116058600	bin3673291	H3K27me3_true
chr5	116058600	116058800	bin3673292	H3K27me3_true
chr5	116058800	116059000	bin3673293	H3K27me3_true
chr5	116059000	116059200	bin3673294	H3K27me3_true
chr5	127290800	127291000	bin3716903	H3K27me3_true
chr5	127291000	127291200	bin3716904	H3K27me3_true
chr5	127291200	127291400	bin3716905	H3K27me3_true
chr6	965600	965800	bin3933405	H3K27me3_true
chr6	965800	966000	bin3933406	H3K27me3_true
chr6	966000	966200	bin3933407	H3K27me3_true
chr6	966200	966400	bin3933408	H3K27me3_true
chr6	966400	966600	bin3933409	H3K27me3_true
chr6	966800	967000	bin3933410	H3K27me3_true
chr6	967000	967200	bin3933411	H3K27me3_true
chr6	967200	967400	bin3933412	H3K27me3_true
chr6	967400	967600	bin3933413	H3K27me3_true
chr6	967600	967800	bin3933414	H3K27me3_true
chr6	967800	968000	bin3933415	H3K27me3_true
chr6	968000	968200	bin3933416	H3K27me3_true
chr6	968200	968400	bin3933417	H3K27me3_true
chr6	968400	968600	bin3933418	H3K27me3_true
chr6	968600	968800	bin3933419	H3K27me3_true
chr6	968800	969000	bin3933420	H3K27me3_true
chr6	969000	969200	bin3933421	H3K27me3_true
chr6	969200	969400	bin3933422	H3K27me3_true
chr6	969400	969600	bin3933423	H3K27me3_true
chr6	29440200	29440400	bin4046120	H3K27me3_true
chr6	29440400	29440600	bin4046121	H3K27me3_true
chr6	29440600	29440800	bin4046122	H3K27me3_true
chr6	29440800	29441000	bin4046123	H3K27me3_true
chr6	32407000	32407200	bin4055431	H3K27me3_true
chr6	32407200	32407400	bin4055432	H3K27me3_true
chr6	32407400	32407600	bin4055433	H3K27me3_true
chr6	70133000	70133200	bin4187827	H3K27me3_true
chr6	70133200	70133400	bin4187828	H3K27me3_true
chr6	70133400	70133600	bin4187829	H3K27me3_true
chr6	99991800	99992000	bin4300524	H3K27me3_true
chr6	99992000	99992200	bin4300525	H3K27me3_true
chr6	99992200	99992400	bin4300526	H3K27me3_true
chr6	99992400	99992600	bin4300527	H3K27me3_true
chr6	99992600	99992800	bin4300528	H3K27me3_true
chr6	99992800	99993000	bin4300529	H3K27me3_true
chr6	99993000	99993200	bin4300530	H3K27me3_true
chr6	99993200	99993400	bin4300531	H3K27me3_true
chr6	99993400	99993600	bin4300532	H3K27me3_true
chr6	99993600	99993800	bin4300533	H3K27me3_true
chr6	99993800	99994000	bin4300534	H3K27me3_true
chr6	99994000	99994200	bin4300535	H3K27me3_true
chr6	99994200	99994400	bin4300536	H3K27me3_true
chr6	99994400	99994600	bin4300537	H3K27me3_true
chr6	99994600	99994800	bin4300538	H3K27me3_true
chr6	100393000	100393200	bin4302208	H3K27me3_true
chr6	100393200	100393400	bin4302209	H3K27me3_true
chr6	100393400	100393600	bin4302210	H3K27me3_true
chr6	100393600	100393800	bin4302211	H3K27me3_true
chr6	100393800	100394000	bin4302212	H3K27me3_true
chr6	100394000	100394200	bin4302213	H3K27me3_true
chr6	100394200	100394400	bin4302214	H3K27me3_true
chr6	100394400	100394600	bin4302215	H3K27me3_true
chr6	110314800	110315000	bin4340936	H3K27me3_true
chr6	110315000	110315200	bin4340937	H3K27me3_true
chr6	110315200	110315400	bin4340938	H3K27me3_true
chr6	110315400	110315600	bin4340939	H3K27me3_true
chr6	110315600	110315800	bin4340940	H3K27me3_true
chr6	110315800	110316000	bin4340941	H3K27me3_true
chr6	110316000	110316200	bin4340942	H3K27me3_true
chr6	110316200	110316400	bin4340943	H3K27me3_true
chr6	110316400	110316600	bin4340944	H3K27me3_true
chr6	110316600	110316800	bin4340945	H3K27me3_true
chr6	116547200	116547400	bin4365569	H3K27me3_true
chr6	116547400	116547600	bin4365570	H3K27me3_true
chr6	116547600	116547800	bin4365571	H3K27me3_true
chr6	116547800	116548000	bin4365572	H3K27me3_true
chr6	116548000	116548200	bin4365573	H3K27me3_true
chr6	139242400	139242600	bin4456952	H3K27me3_true
chr6	139242600	139242800	bin4456953	H3K27me3_true
chr6	139242800	139243000	bin4456954	H3K27me3_true
chr6	139243000	139243200	bin4456955	H3K27me3_true
chr6	139243200	139243400	bin4456956	H3K27me3_true
chr6	139243400	139243600	bin4456957	H3K27me3_true
chr6	139243600	139243800	bin4456958	H3K27me3_true
chr6	139243800	139244000	bin4456959	H3K27me3_true
chr6	139244000	139244200	bin4456960	H3K27me3_true
chr7	3656400	3656600	bin4596519	H3K27me3_true
chr7	3656600	3656800	bin4596520	H3K27me3_true
chr7	3657000	3657200	bin4596521	H3K27me3_true
chr7	3657200	3657400	bin4596522	H3K27me3_true
chr7	3657400	3657600	bin4596523	H3K27me3_true
chr7	3657600	3657800	bin4596524	H3K27me3_true
chr7	3657800	3658000	bin4596525	H3K27me3_true
chr7	3658000	3658200	bin4596526	H3K27me3_true
chr7	3658200	3658400	bin4596527	H3K27me3_true
chr7	3787800	3788000	bin4597076	H3K27me3_true
chr7	3788000	3788200	bin4597077	H3K27me3_true
chr7	3788200	3788400	bin4597078	H3K27me3_true
chr7	3788400	3788600	bin4597079	H3K27me3_true
chr7	3788600	3788800	bin4597080	H3K27me3_true
chr7	3788800	3789000	bin4597081	H3K27me3_true
chr7	3789000	3789200	bin4597082	H3K27me3_true
chr7	3789400	3789600	bin4597083	H3K27me3_true
chr7	3789600	3789800	bin4597084	H3K27me3_true
chr7	3789800	3790000	bin4597085	H3K27me3_true
chr7	3790000	3790200	bin4597086	H3K27me3_true
chr7	21748400	21748600	bin4665596	H3K27me3_true
chr7	21748600	21748800	bin4665597	H3K27me3_true
chr7	21748800	21749000	bin4665598	H3K27me3_true
chr7	21749000	21749200	bin4665599	H3K27me3_true
chr7	21749200	21749400	bin4665600	H3K27me3_true
chr7	21749400	21749600	bin4665601	H3K27me3_true
chr7	21749600	21749800	bin4665602	H3K27me3_true
chr7	33904000	33904200	bin4713496	H3K27me3_true
chr7	33904200	33904400	bin4713497	H3K27me3_true
chr7	33904400	33904600	bin4713498	H3K27me3_true
chr7	33904600	33904800	bin4713499	H3K27me3_true
chr7	33904800	33905000	bin4713500	H3K27me3_true
chr7	33905000	33905200	bin4713501	H3K27me3_true
chr7	33905200	33905400	bin4713502	H3K27me3_true
chr7	33905400	33905600	bin4713503	H3K27me3_true
chr7	55052600	55052800	bin4795174	H3K27me3_true
chr7	55052800	55053000	bin4795175	H3K27me3_true
chr7	55053000	55053200	bin4795176	H3K27me3_true
chr7	55053200	55053400	bin4795177	H3K27me3_true
chr7	55053400	55053600	bin4795178	H3K27me3_true
chr7	55053600	55053800	bin4795179	H3K27me3_true
chr7	55053800	55054000	bin4795180	H3K27me3_true
chr7	55054000	55054200	bin4795181	H3K27me3_true
chr7	55054200	55054400	bin4795182	H3K27me3_true
chr7	55054400	55054600	bin4795183	H3K27me3_true
chr7	55054600	55054800	bin4795184	H3K27me3_true
chr7	55054800	55055000	bin4795185	H3K27me3_true
chr7	55055000	55055200	bin4795186	H3K27me3_true
chr7	55055200	55055400	bin4795187	H3K27me3_true
chr7	55055400	55055600	bin4795188	H3K27me3_true
chr7	55055600	55055800	bin4795189	H3K27me3_true
chr7	55055800	55056000	bin4795190	H3K27me3_true
chr7	55056000	55056200	bin4795191	H3K27me3_true
chr7	55056200	55056400	bin4795192	H3K27me3_true
chr7	55056400	55056600	bin4795193	H3K27me3_true
chr7	55056600	55056800	bin4795194	H3K27me3_true
chr7	55056800	55057000	bin4795195	H3K27me3_true
chr7	55057000	55057200	bin4795196	H3K27me3_true
chr7	55057200	55057400	bin4795197	H3K27me3_true
chr7	77377800	77378000	bin4828779	H3K27me3_true
chr7	88306600	88306800	bin4873313	H3K27me3_true
chr7	88306800	88307000	bin4873314	H3K27me3_true
chr7	88307000	88307200	bin4873315	H3K27me3_true
chr8	1028800	1029000	bin5612485	H3K27me3_true
chr8	1029000	1029200	bin5612486	H3K27me3_true
chr8	1029200	1029400	bin5612487	H3K27me3_true
chr8	1029400	1029600	bin5612488	H3K27me3_true
chr8	1029600	1029800	bin5612489	H3K27me3_true
chr8	1029800	1030000	bin5612490	H3K27me3_true
chr8	1126600	1126800	bin5612879	H3K27me3_true
chr8	1126800	1127000	bin5612880	H3K27me3_true
chr8	1127200	1127400	bin5612881	H3K27me3_true
chr8	1127400	1127600	bin5612882	H3K27me3_true
chr8	1127600	1127800	bin5612883	H3K27me3_true
chr8	1127800	1128000	bin5612884	H3K27me3_true
chr8	1128000	1128200	bin5612885	H3K27me3_true
chr8	1128200	1128400	bin5612886	H3K27me3_true
chr8	1128400	1128600	bin5612887	H3K27me3_true
chr8	1128600	1128800	bin5612888	H3K27me3_true
chr8	1128800	1129000	bin5612889	H3K27me3_true
chr8	1129000	1129200	bin5612890	H3K27me3_true
chr8	1129400	1129600	bin5612891	H3K27me3_true
chr8	1129600	1129800	bin5612892	H3K27me3_true
chr8	1129800	1130000	bin5612893	H3K27me3_true
chr8	1130000	1130200	bin5612894	H3K27me3_true
chr8	1130200	1130400	bin5612895	H3K27me3_true
chr8	1300400	1300600	bin5613549	H3K27me3_true
chr8	1300600	1300800	bin5613550	H3K27me3_true
chr8	1300800	1301000	bin5613551	H3K27me3_true
chr8	1301000	1301200	bin5613552	H3K27me3_true
chr8	1301200	1301400	bin5613553	H3K27me3_true
chr8	1301400	1301600	bin5613554	H3K27me3_true
chr8	1301600	1301800	bin5613555	H3K27me3_true
chr8	1301800	1302000	bin5613556	H3K27me3_true
chr8	1302000	1302200	bin5613557	H3K27me3_true
chr8	1302600	1302800	bin5613558	H3K27me3_true
chr8	1302800	1303000	bin5613559	H3K27me3_true
chr8	1303000	1303200	bin5613560	H3K27me3_true
chr8	1303400	1303600	bin5613561	H3K27me3_true
chr8	1303600	1303800	bin5613562	H3K27me3_true
chr8	1303800	1304000	bin5613563	H3K27me3_true
chr8	6877400	6877600	bin5636542	H3K27me3_true
chr8	6877600	6877800	bin5636543	H3K27me3_true
chr8	6877800	6878000	bin5636544	H3K27me3_true
chr8	6878000	6878200	bin5636545	H3K27me3_true
chr8	17543200	17543400	bin5672794	H3K27me3_true
chr8	17543400	17543600	bin5672795	H3K27me3_true
chr8	17885800	17886000	bin5674207	H3K27me3_true
chr8	17886000	17886200	bin5674208	H3K27me3_true
chr8	17886200	17886400	bin5674209	H3K27me3_true
chr8	17886400	17886600	bin5674210	H3K27me3_true
chr8	17886800	17887000	bin5674211	H3K27me3_true
chr8	17887000	17887200	bin5674212	H3K27me3_true
chr8	17887200	17887400	bin5674213	H3K27me3_true
chr8	18682400	18682600	bin5677251	H3K27me3_true
chr8	18682600	18682800	bin5677252	H3K27me3_true
chr8	18682800	18683000	bin5677253	H3K27me3_true
chr8	18683000	18683200	bin5677254	H3K27me3_true
chr8	18683200	18683400	bin5677255	H3K27me3_true
chr8	18683400	18683600	bin5677256	H3K27me3_true
chr8	18683600	18683800	bin5677257	H3K27me3_true
chr8	18683800	18684000	bin5677258	H3K27me3_true
chr8	18684000	18684200	bin5677259	H3K27me3_true
chr8	18684200	18684400	bin5677260	H3K27me3_true
chr8	18684400	18684600	bin5677261	H3K27me3_true
chr8	18684600	18684800	bin5677262	H3K27me3_true
chr8	18684800	18685000	bin5677263	H3K27me3_true
chr8	18686200	18686400	bin5677270	H3K27me3_true
chr8	18686400	18686600	bin5677271	H3K27me3_true
chr8	18686600	18686800	bin5677272	H3K27me3_true
chr8	18686800	18687000	bin5677273	H3K27me3_true
chr8	18689400	18689600	bin5677282	H3K27me3_true
chr8	18689600	18689800	bin5677283	H3K27me3_true
chr8	18689800	18690000	bin5677284	H3K27me3_true
chr8	18690000	18690200	bin5677285	H3K27me3_true
chr8	18690200	18690400	bin5677286	H3K27me3_true
chr8	18690400	18690600	bin5677287	H3K27me3_true
chr8	18690600	18690800	bin5677288	H3K27me3_true
chr8	18947600	18947800	bin5678356	H3K27me3_true
chr8	18947800	18948000	bin5678357	H3K27me3_true
chr8	40775400	40775600	bin5766425	H3K27me3_true
chr8	40775600	40775800	bin5766426	H3K27me3_true
chr8	48554400	48554600	bin5782728	H3K27me3_true
chr8	48554600	48554800	bin5782729	H3K27me3_true
chr8	48554800	48555000	bin5782730	H3K27me3_true
chr8	48555000	48555200	bin5782731	H3K27me3_true
chr8	48555200	48555400	bin5782732	H3K27me3_true
chr8	48555400	48555600	bin5782733	H3K27me3_true
chr8	48555600	48555800	bin5782734	H3K27me3_true
chr8	48555800	48556000	bin5782735	H3K27me3_true
chr8	48556000	48556200	bin5782736	H3K27me3_true
chr8	48556200	48556400	bin5782737	H3K27me3_true
chr8	54457800	54458000	bin5805471	H3K27me3_true
chr8	54458000	54458200	bin5805472	H3K27me3_true
chr8	54458400	54458600	bin5805473	H3K27me3_true
chr8	54458600	54458800	bin5805474	H3K27me3_true
chr8	54458800	54459000	bin5805475	H3K27me3_true
chr8	55517000	55517200	bin5809848	H3K27me3_true
chr8	55517200	55517400	bin5809849	H3K27me3_true
chr8	55517400	55517600	bin5809850	H3K27me3_true
chr8	55517600	55517800	bin5809851	H3K27me3_true
chr8	55517800	55518000	bin5809852	H3K27me3_true
chr8	55518000	55518200	bin5809853	H3K27me3_true
chr8	55518200	55518400	bin5809854	H3K27me3_true
chr8	55518400	55518600	bin5809855	H3K27me3_true
chr8	55518600	55518800	bin5809856	H3K27me3_true
chr8	55518800	55519000	bin5809857	H3K27me3_true
chr8	57257800	57258000	bin5816229	H3K27me3_true
chr8	57258000	57258200	bin5816230	H3K27me3_true
chr8	57258200	57258400	bin5816231	H3K27me3_true
chr8	57258400	57258600	bin5816232	H3K27me3_true
chr8	57258600	57258800	bin5816233	H3K27me3_true
chr8	57258800	57259000	bin5816234	H3K27me3_true
chr8	57259000	57259200	bin5816235	H3K27me3_true
chr8	57259200	57259400	bin5816236	H3K27me3_true
chr8	57259400	57259600	bin5816237	H3K27me3_true
chr8	57259600	57259800	bin5816238	H3K27me3_true
chr8	57259800	57260000	bin5816239	H3K27me3_true
chr8	57260000	57260200	bin5816240	H3K27me3_true
chr8	57260200	57260400	bin5816241	H3K27me3_true
chr8	57260400	57260600	bin5816242	H3K27me3_true
chr8	57260600	57260800	bin5816243	H3K27me3_true
chr8	57260800	57261000	bin5816244	H3K27me3_true
chr8	57261000	57261200	bin5816245	H3K27me3_true
chr8	66027800	66028000	bin5850844	H3K27me3_true
chr8	66028000	66028200	bin5850845	H3K27me3_true
chr8	66028200	66028400	bin5850846	H3K27me3_true
chr8	66028400	66028600	bin5850847	H3K27me3_true
chr8	66028600	66028800	bin5850848	H3K27me3_true
chr8	66028800	66029000	bin5850849	H3K27me3_true
chr8	66029000	66029200	bin5850850	H3K27me3_true
chr8	66029200	66029400	bin5850851	H3K27me3_true
chr8	66029400	66029600	bin5850852	H3K27me3_true
chr8	97287600	97287800	bin5972505	H3K27me3_true
chr8	97287800	97288000	bin5972506	H3K27me3_true
chr8	104223200	104223400	bin5999642	H3K27me3_true
chr8	104223400	104223600	bin5999643	H3K27me3_true
chr8	104223600	104223800	bin5999644	H3K27me3_true
chr8	104223800	104224000	bin5999645	H3K27me3_true
chr8	138723600	138723800	bin6142161	H3K27me3_true
chr8	138723800	138724000	bin6142162	H3K27me3_true
chr8	138724000	138724200	bin6142163	H3K27me3_true
chr8	138724200	138724400	bin6142164	H3K27me3_true
chr8	138724400	138724600	bin6142165	H3K27me3_true
chr8	138724600	138724800	bin6142166	H3K27me3_true
chr8	138724800	138725000	bin6142167	H3K27me3_true
chr9	975200	975400	bin6171494	H3K27me3_true
chr9	975400	975600	bin6171495	H3K27me3_true
chr9	975600	975800	bin6171496	H3K27me3_true
chr9	975800	976000	bin6171497	H3K27me3_true
chr9	976000	976200	bin6171498	H3K27me3_true
chr9	976200	976400	bin6171499	H3K27me3_true
chr9	976400	976600	bin6171500	H3K27me3_true
chr9	976600	976800	bin6171501	H3K27me3_true
chr9	976800	977000	bin6171502	H3K27me3_true
chr9	977000	977200	bin6171503	H3K27me3_true
chr9	977200	977400	bin6171504	H3K27me3_true
chr9	977400	977600	bin6171505	H3K27me3_true
chr9	977600	977800	bin6171506	H3K27me3_true
chr9	977800	978000	bin6171507	H3K27me3_true
chr9	978000	978200	bin6171508	H3K27me3_true
chr9	978200	978400	bin6171509	H3K27me3_true
chr9	978400	978600	bin6171510	H3K27me3_true
chr9	978600	978800	bin6171511	H3K27me3_true
chr9	978800	979000	bin6171512	H3K27me3_true
chr9	979000	979200	bin6171513	H3K27me3_true
chr9	979200	979400	bin6171514	H3K27me3_true
chr9	1045800	1046000	bin6171811	H3K27me3_true
chr9	1046000	1046200	bin6171812	H3K27me3_true
chr9	1046200	1046400	bin6171813	H3K27me3_true
chr9	1046400	1046600	bin6171814	H3K27me3_true
chr9	1046600	1046800	bin6171815	H3K27me3_true
chr9	1046800	1047000	bin6171816	H3K27me3_true
chr9	1047000	1047200	bin6171817	H3K27me3_true
chr9	1047200	1047400	bin6171818	H3K27me3_true
chr9	1047400	1047600	bin6171819	H3K27me3_true
chr9	1047600	1047800	bin6171820	H3K27me3_true
chr9	1047800	1048000	bin6171821	H3K27me3_true
chr9	1048000	1048200	bin6171822	H3K27me3_true
chr9	1048200	1048400	bin6171823	H3K27me3_true
chr9	1048400	1048600	bin6171824	H3K27me3_true
chr9	1048600	1048800	bin6171825	H3K27me3_true
chr9	1048800	1049000	bin6171826	H3K27me3_true
chr9	1049000	1049200	bin6171827	H3K27me3_true
chr9	1049200	1049400	bin6171828	H3K27me3_true
chr9	1050200	1050400	bin6171833	H3K27me3_true
chr9	1050400	1050600	bin6171834	H3K27me3_true
chr9	1050600	1050800	bin6171835	H3K27me3_true
chr9	1050800	1051000	bin6171836	H3K27me3_true
chr9	1051000	1051200	bin6171837	H3K27me3_true
chr9	1051200	1051400	bin6171838	H3K27me3_true
chr9	1051400	1051600	bin6171839	H3K27me3_true
chr9	3180200	3180400	bin6180436	H3K27me3_true
chr9	3180400	3180600	bin6180437	H3K27me3_true
chr9	3180600	3180800	bin6180438	H3K27me3_true
chr9	3180800	3181000	bin6180439	H3K27me3_true
chr9	3181000	3181200	bin6180440	H3K27me3_true
chr9	3181200	3181400	bin6180441	H3K27me3_true
chr9	3181400	3181600	bin6180442	H3K27me3_true
chr9	3181600	3181800	bin6180443	H3K27me3_true
chr9	3181800	3182000	bin6180444	H3K27me3_true
chr9	3182000	3182200	bin6180445	H3K27me3_true
chr9	3182200	3182400	bin6180446	H3K27me3_true
chr9	3186200	3186400	bin6180462	H3K27me3_true
chr9	3186400	3186600	bin6180463	H3K27me3_true
chr9	69386800	69387000	bin6321426	H3K27me3_true
chr9	69387000	69387200	bin6321427	H3K27me3_true
chr9	69387200	69387400	bin6321428	H3K27me3_true
chr9	69387400	69387600	bin6321429	H3K27me3_true
chr9	69387600	69387800	bin6321430	H3K27me3_true
chr9	69387800	69388000	bin6321431	H3K27me3_true
chr9	69388000	69388200	bin6321432	H3K27me3_true
chr9	69391000	69391200	bin6321446	H3K27me3_true
chr9	69391200	69391400	bin6321447	H3K27me3_true
chr9	69391400	69391600	bin6321448	H3K27me3_true
chr9	69391600	69391800	bin6321449	H3K27me3_true
chr9	69391800	69392000	bin6321450	H3K27me3_true
chr9	69392000	69392200	bin6321451	H3K27me3_true
chr9	69392200	69392400	bin6321452	H3K27me3_true
chr9	69392400	69392600	bin6321453	H3K27me3_true
chr9	69392600	69392800	bin6321454	H3K27me3_true
chr9	69392800	69393000	bin6321455	H3K27me3_true
chr9	69393000	69393200	bin6321456	H3K27me3_true
chr9	69393200	69393400	bin6321457	H3K27me3_true
chr9	69393400	69393600	bin6321458	H3K27me3_true
chr9	69393600	69393800	bin6321459	H3K27me3_true
chr9	72623800	72624000	bin6334416	H3K27me3_true
chr9	72624000	72624200	bin6334417	H3K27me3_true
chr9	72624200	72624400	bin6334418	H3K27me3_true
chr9	72624400	72624600	bin6334419	H3K27me3_true
chr9	72624600	72624800	bin6334420	H3K27me3_true
chr9	110047800	110048000	bin6478638	H3K27me3_true
chr9	110048000	110048200	bin6478639	H3K27me3_true
chr9	110048200	110048400	bin6478640	H3K27me3_true
chr9	110048400	110048600	bin6478641	H3K27me3_true
chr9	110048600	110048800	bin6478642	H3K27me3_true
chr9	110048800	110049000	bin6478643	H3K27me3_true
chr9	110049000	110049200	bin6478644	H3K27me3_true
chr9	110049200	110049400	bin6478645	H3K27me3_true
chr9	110049400	110049600	bin6478646	H3K27me3_true
chr9	110049600	110049800	bin6478647	H3K27me3_true
chr9	110049800	110050000	bin6478648	H3K27me3_true
chr9	110050000	110050200	bin6478649	H3K27me3_true
chr9	110050200	110050400	bin6478650	H3K27me3_true
chr9	110050400	110050600	bin6478651	H3K27me3_true
chr1	1116200	1116400	bin909	H3K27me3_false
chr1	1116400	1116600	bin910	H3K27me3_false
chr1	3624600	3624800	bin10479	H3K27me3_false
chr1	3624800	3625000	bin10480	H3K27me3_false
chr1	9823000	9823200	bin35330	H3K27me3_false
chr1	9823200	9823400	bin35331	H3K27me3_false
chr1	9823400	9823600	bin35332	H3K27me3_false
chr1	9823600	9823800	bin35333	H3K27me3_false
chr1	9823800	9824000	bin35334	H3K27me3_false
chr1	9824000	9824200	bin35335	H3K27me3_false
chr1	9824200	9824400	bin35336	H3K27me3_false
chr1	9824400	9824600	bin35337	H3K27me3_false
chr1	12104600	12104800	bin44204	H3K27me3_false
chr1	12104800	12105000	bin44205	H3K27me3_false
chr1	12105000	12105200	bin44206	H3K27me3_false
chr1	12105200	12105400	bin44207	H3K27me3_false
chr1	32894800	32895000	bin119407	H3K27me3_false
chr1	32895000	32895200	bin119408	H3K27me3_false
chr1	32895200	32895400	bin119409	H3K27me3_false
chr1	32895400	32895600	bin119410	H3K27me3_false
chr1	32895600	32895800	bin119411	H3K27me3_false
chr1	32895800	32896000	bin119412	H3K27me3_false
chr1	32896000	32896200	bin119413	H3K27me3_false
chr1	32896200	32896400	bin119414	H3K27me3_false
chr1	32896400	32896600	bin119415	H3K27me3_false
chr1	32896600	32896800	bin119416	H3K27me3_false
chr1	32896800	32897000	bin119417	H3K27me3_false
chr1	32897000	32897200	bin119418	H3K27me3_false
chr1	32897200	32897400	bin119419	H3K27me3_false
chr1	32897400	32897600	bin119420	H3K27me3_false
chr1	37596200	37596400	bin138558	H3K27me3_false
chr1	39902000	39902200	bin147467	H3K27me3_false
chr1	39902200	39902400	bin147468	H3K27me3_false
chr1	39902400	39902600	bin147469	H3K27me3_false
chr1	39902600	39902800	bin147470	H3K27me3_false
chr1	39902800	39903000	bin147471	H3K27me3_false
chr1	39903000	39903200	bin147472	H3K27me3_false
chr1	39903200	39903400	bin147473	H3K27me3_false
chr1	39903400	39903600	bin147474	H3K27me3_false
chr1	39903600	39903800	bin147475	H3K27me3_false
chr1	44594200	44594400	bin166083	H3K27me3_false
chr1	44594400	44594600	bin166084	H3K27me3_false
chr1	44594600	44594800	bin166085	H3K27me3_false
chr1	44594800	44595000	bin166086	H3K27me3_false
chr1	44595000	44595200	bin166087	H3K27me3_false
chr1	44595200	44595400	bin166088	H3K27me3_false
chr1	44595400	44595600	bin166089	H3K27me3_false
chr1	52927000	52927200	bin195796	H3K27me3_false
chr1	52927200	52927400	bin195797	H3K27me3_false
chr1	52927400	52927600	bin195798	H3K27me3_false
chr1	52927600	52927800	bin195799	H3K27me3_false
chr1	52927800	52928000	bin195800	H3K27me3_false
chr1	52928000	52928200	bin195801	H3K27me3_false
chr1	55037800	55038000	bin204319	H3K27me3_false
chr1	55038000	55038200	bin204320	H3K27me3_false
chr1	55038200	55038400	bin204321	H3K27me3_false
chr1	55038400	55038600	bin204322	H3K27me3_false
chr1	55038600	55038800	bin204323	H3K27me3_false
chr1	55038800	55039000	bin204324	H3K27me3_false
chr1	55039000	55039200	bin204325	H3K27me3_false
chr1	55039200	55039400	bin204326	H3K27me3_false
chr1	55039400	55039600	bin204327	H3K27me3_false
chr1	55039600	55039800	bin204328	H3K27me3_false
chr1	55039800	55040000	bin204329	H3K27me3_false
chr1	55040000	55040200	bin204330	H3K27me3_false
chr1	55040200	55040400	bin204331	H3K27me3_false
chr1	55040400	55040600	bin204332	H3K27me3_false
chr1	55040600	55040800	bin204333	H3K27me3_false
chr1	55040800	55041000	bin204334	H3K27me3_false
chr1	55041000	55041200	bin204335	H3K27me3_false
chr1	55041200	55041400	bin204336	H3K27me3_false
chr1	58783600	58783800	bin220327	H3K27me3_false
chr1	58783800	58784000	bin220328	H3K27me3_false
chr1	58784000	58784200	bin220329	H3K27me3_false
chr1	58784200	58784400	bin220330	H3K27me3_false
chr1	116372600	116372800	bin445199	H3K27me3_false
chr1	116372800	116373000	bin445200	H3K27me3_false
chr1	116373000	116373200	bin445201	H3K27me3_false
chr1	116373200	116373400	bin445202	H3K27me3_false
chr1	175192800	175193000	bin556504	H3K27me3_false
chr1	175193000	175193200	bin556505	H3K27me3_false
chr1	175193200	175193400	bin556506	H3K27me3_false
chr1	183635600	183635800	bin590412	H3K27me3_false
chr1	183635800	183636000	bin590413	H3K27me3_false
chr1	184973600	184973800	bin595959	H3K27me3_false
chr1	184973800	184974000	bin595960	H3K27me3_false
chr1	184974000	184974200	bin595961	H3K27me3_false
chr1	184974200	184974400	bin595962	H3K27me3_false
chr1	184974400	184974600	bin595963	H3K27me3_false
chr1	200996400	200996600	bin659298	H3K27me3_false
chr1	212608400	212608600	bin704263	H3K27me3_false
chr1	212608600	212608800	bin704264	H3K27me3_false
chr1	212608800	212609000	bin704265	H3K27me3_false
chr1	212609000	212609200	bin704266	H3K27me3_false
chr1	212609200	212609400	bin704267	H3K27me3_false
chr1	212609400	212609600	bin704268	H3K27me3_false
chr1	212609600	212609800	bin704269	H3K27me3_false
chr1	230642200	230642400	bin774810	H3K27me3_false
chr10	1159200	1159400	bin7091223	H3K27me3_false
chr10	1159400	1159600	bin7091224	H3K27me3_false
chr10	1159600	1159800	bin7091225	H3K27me3_false
chr10	3173000	3173200	bin7100107	H3K27me3_false
chr10	3173200	3173400	bin7100108	H3K27me3_false
chr10	21173800	21174000	bin7173246	H3K27me3_false
chr10	21174000	21174200	bin7173247	H3K27me3_false
chr10	21174200	21174400	bin7173248	H3K27me3_false
chr10	21174400	21174600	bin7173249	H3K27me3_false
chr10	71757200	71757400	bin7337492	H3K27me3_false
chr10	71757400	71757600	bin7337493	H3K27me3_false
chr10	71757600	71757800	bin7337494	H3K27me3_false
chr10	71757800	71758000	bin7337495	H3K27me3_false
chr10	71758000	71758200	bin7337496	H3K27me3_false
chr10	71758200	71758400	bin7337497	H3K27me3_false
chr10	71761400	71761600	bin7337506	H3K27me3_false
chr10	71761600	71761800	bin7337507	H3K27me3_false
chr10	71761800	71762000	bin7337508	H3K27me3_false
chr10	71762000	71762200	bin7337509	H3K27me3_false
chr10	71762200	71762400	bin7337510	H3K27me3_false
chr10	71762400	71762600	bin7337511	H3K27me3_false
chr10	97498800	97499000	bin7433985	H3K27me3_false
chr10	97499000	97499200	bin7433986	H3K27me3_false
chr11	33774200	33774400	bin6724622	H3K27me3_false
chr11	33774400	33774600	bin6724623	H3K27me3_false
chr11	33774600	33774800	bin6724624	H3K27me3_false
chr11	33774800	33775000	bin6724625	H3K27me3_false
chr11	46339800	46340000	bin6775510	H3K27me3_false
chr11	46340000	46340200	bin6775511	H3K27me3_false
chr11	46340200	46340400	bin6775512	H3K27me3_false
chr11	46340400	46340600	bin6775513	H3K27me3_false
chr11	70269800	70270000	bin6834227	H3K27me3_false
chr11	70270000	70270200	bin6834228	H3K27me3_false
chr11	70270200	70270400	bin6834229	H3K27me3_false
chr11	70270400	70270600	bin6834230	H3K27me3_false
chr11	70270600	70270800	bin6834231	H3K27me3_false
chr11	94767200	94767400	bin6923739	H3K27me3_false
chr11	94767400	94767600	bin6923740	H3K27me3_false
chr11	94767600	94767800	bin6923741	H3K27me3_false
chr11	94767800	94768000	bin6923742	H3K27me3_false
chr11	94768000	94768200	bin6923743	H3K27me3_false
chr11	94768200	94768400	bin6923744	H3K27me3_false
chr11	94768400	94768600	bin6923745	H3K27me3_false
chr11	94768600	94768800	bin6923746	H3K27me3_false
chr11	94768800	94769000	bin6923747	H3K27me3_false
chr11	94769000	94769200	bin6923748	H3K27me3_false
chr11	94769200	94769400	bin6923749	H3K27me3_false
chr11	94769400	94769600	bin6923750	H3K27me3_false
chr11	94769600	94769800	bin6923751	H3K27me3_false
chr11	94769800	94770000	bin6923752	H3K27me3_false
chr11	94770000	94770200	bin6923753	H3K27me3_false
chr11	94770200	94770400	bin6923754	H3K27me3_false
chr11	94770400	94770600	bin6923755	H3K27me3_false
chr11	94770600	94770800	bin6923756	H3K27me3_false
chr11	94788400	94788600	bin6923837	H3K27me3_false
chr11	94788600	94788800	bin6923838	H3K27me3_false
chr11	94788800	94789000	bin6923839	H3K27me3_false
chr11	94789000	94789200	bin6923840	H3K27me3_false
chr11	94789400	94789600	bin6923841	H3K27me3_false
chr11	94789600	94789800	bin6923842	H3K27me3_false
chr11	94789800	94790000	bin6923843	H3K27me3_false
chr11	94790000	94790200	bin6923844	H3K27me3_false
chr11	94790200	94790400	bin6923845	H3K27me3_false
chr11	94790400	94790600	bin6923846	H3K27me3_false
chr11	94790600	94790800	bin6923847	H3K27me3_false
chr11	94794200	94794400	bin6923864	H3K27me3_false
chr11	94794400	94794600	bin6923865	H3K27me3_false
chr11	94794600	94794800	bin6923866	H3K27me3_false
chr11	94794800	94795000	bin6923867	H3K27me3_false
chr11	120210400	120210600	bin7025108	H3K27me3_false
chr11	120210600	120210800	bin7025109	H3K27me3_false
chr11	120210800	120211000	bin7025110	H3K27me3_false
chr11	120211000	120211200	bin7025111	H3K27me3_false
chr11	120211200	120211400	bin7025112	H3K27me3_false
chr11	120211400	120211600	bin7025113	H3K27me3_false
chr11	120211600	120211800	bin7025114	H3K27me3_false
chr11	120219000	120219200	bin7025149	H3K27me3_false
chr11	120219200	120219400	bin7025150	H3K27me3_false
chr11	120219400	120219600	bin7025151	H3K27me3_false
chr11	120219600	120219800	bin7025152	H3K27me3_false
chr11	120219800	120220000	bin7025153	H3K27me3_false
chr11	120220000	120220200	bin7025154	H3K27me3_false
chr11	120220200	120220400	bin7025155	H3K27me3_false
chr11	120220400	120220600	bin7025156	H3K27me3_false
chr11	120220600	120220800	bin7025157	H3K27me3_false
chr11	120220800	120221000	bin7025158	H3K27me3_false
chr12	4271000	4271200	bin7600838	H3K27me3_false
chr12	4271200	4271400	bin7600839	H3K27me3_false
chr12	4271400	4271600	bin7600840	H3K27me3_false
chr12	4271600	4271800	bin7600841	H3K27me3_false
chr12	4271800	4272000	bin7600842	H3K27me3_false
chr12	4272000	4272200	bin7600843	H3K27me3_false
chr12	4272200	4272400	bin7600844	H3K27me3_false
chr12	4272400	4272600	bin7600845	H3K27me3_false
chr12	4272600	4272800	bin7600846	H3K27me3_false
chr12	4272800	4273000	bin7600847	H3K27me3_false
chr12	4273000	4273200	bin7600848	H3K27me3_false
chr12	4273200	4273400	bin7600849	H3K27me3_false
chr12	4273400	4273600	bin7600850	H3K27me3_false
chr12	4273600	4273800	bin7600851	H3K27me3_false
chr12	4273800	4274000	bin7600852	H3K27me3_false
chr12	4274000	4274200	bin7600853	H3K27me3_false
chr12	4274200	4274400	bin7600854	H3K27me3_false
chr12	4274400	4274600	bin7600855	H3K27me3_false
chr12	4274600	4274800	bin7600856	H3K27me3_false
chr12	14567400	14567600	bin7636172	H3K27me3_false
chr12	14567600	14567800	bin7636173	H3K27me3_false
chr12	14567800	14568000	bin7636174	H3K27me3_false
chr12	14568000	14568200	bin7636175	H3K27me3_false
chr12	14568200	14568400	bin7636176	H3K27me3_false
chr12	62760800	62761000	bin7802267	H3K27me3_false
chr12	62761000	62761200	bin7802268	H3K27me3_false
chr12	62761200	62761400	bin7802269	H3K27me3_false
chr12	62761400	62761600	bin7802270	H3K27me3_false
chr12	62761600	62761800	bin7802271	H3K27me3_false
chr12	62761800	62762000	bin7802272	H3K27me3_false
chr12	62762000	62762200	bin7802273	H3K27me3_false
chr12	62762200	62762400	bin7802274	H3K27me3_false
chr12	62931400	62931600	bin7803004	H3K27me3_false
chr12	62931600	62931800	bin7803005	H3K27me3_false
chr12	62931800	62932000	bin7803006	H3K27me3_false
chr12	62932000	62932200	bin7803007	H3K27me3_false
chr12	62932200	62932400	bin7803008	H3K27me3_false
chr12	62933200	62933400	bin7803013	H3K27me3_false
chr12	62933400	62933600	bin7803014	H3K27me3_false
chr12	62933600	62933800	bin7803015	H3K27me3_false
chr12	62933800	62934000	bin7803016	H3K27me3_false
chr12	62934000	62934200	bin7803017	H3K27me3_false
chr12	62934200	62934400	bin7803018	H3K27me3_false
chr12	62934400	62934600	bin7803019	H3K27me3_false
chr12	62934600	62934800	bin7803020	H3K27me3_false
chr12	62934800	62935000	bin7803021	H3K27me3_false
chr12	62935000	62935200	bin7803022	H3K27me3_false
chr12	62935200	62935400	bin7803023	H3K27me3_false
chr12	62935400	62935600	bin7803024	H3K27me3_false
chr12	116738000	116738200	bin8016307	H3K27me3_false
chr12	116738200	116738400	bin8016308	H3K27me3_false
chr12	125065000	125065200	bin8047661	H3K27me3_false
chr12	125065200	125065400	bin8047662	H3K27me3_false
chr12	125092400	125092600	bin8047762	H3K27me3_false
chr12	125092600	125092800	bin8047763	H3K27me3_false
chr12	125092800	125093000	bin8047764	H3K27me3_false
chr12	125093000	125093200	bin8047765	H3K27me3_false
chr12	125093200	125093400	bin8047766	H3K27me3_false
chr12	125094600	125094800	bin8047773	H3K27me3_false
chr12	125094800	125095000	bin8047774	H3K27me3_false
chr12	125095000	125095200	bin8047775	H3K27me3_false
chr12	125095200	125095400	bin8047776	H3K27me3_false
chr12	125095400	125095600	bin8047777	H3K27me3_false
chr12	125095600	125095800	bin8047778	H3K27me3_false
chr12	125095800	125096000	bin8047779	H3K27me3_false
chr12	125096200	125096400	bin8047780	H3K27me3_false
chr12	125096400	125096600	bin8047781	H3K27me3_false
chr12	125096600	125096800	bin8047782	H3K27me3_false
chr12	125096800	125097000	bin8047783	H3K27me3_false
chr12	125097000	125097200	bin8047784	H3K27me3_false
chr12	125097200	125097400	bin8047785	H3K27me3_false
chr12	125097400	125097600	bin8047786	H3K27me3_false
chr12	125097600	125097800	bin8047787	H3K27me3_false
chr12	125097800	125098000	bin8047788	H3K27me3_false
chr12	125098000	125098200	bin8047789	H3K27me3_false
chr13	113861800	113862000	bin8457344	H3K27me3_false
chr15	40956200	40956400	bin8856695	H3K27me3_false
chr15	40956400	40956600	bin8856696	H3K27me3_false
chr15	40956600	40956800	bin8856697	H3K27me3_false
chr15	40956800	40957000	bin8856698	H3K27me3_false
chr15	40957000	40957200	bin8856699	H3K27me3_false
chr15	40957200	40957400	bin8856700	H3K27me3_false
chr15	40957400	40957600	bin8856701	H3K27me3_false
chr15	41572400	41572600	bin8858619	H3K27me3_false
chr15	41572600	41572800	bin8858620	H3K27me3_false
chr15	41572800	41573000	bin8858621	H3K27me3_false
chr15	41573000	41573200	bin8858622	H3K27me3_false
chr15	41573200	41573400	bin8858623	H3K27me3_false
chr15	41573400	41573600	bin8858624	H3K27me3_false
chr15	41573600	41573800	bin8858625	H3K27me3_false
chr15	63047400	63047600	bin8940903	H3K27me3_false
chr15	63047600	63047800	bin8940904	H3K27me3_false
chr15	63047800	63048000	bin8940905	H3K27me3_false
chr15	63048000	63048200	bin8940906	H3K27me3_false
chr15	63048200	63048400	bin8940907	H3K27me3_false
chr15	63048400	63048600	bin8940908	H3K27me3_false
chr15	101307400	101307600	bin9089176	H3K27me3_false
chr15	101307600	101307800	bin9089177	H3K27me3_false
chr15	101307800	101308000	bin9089178	H3K27me3_false
chr15	101308000	101308200	bin9089179	H3K27me3_false
chr15	101308200	101308400	bin9089180	H3K27me3_false
chr15	101308400	101308600	bin9089181	H3K27me3_false
chr15	101308600	101308800	bin9089182	H3K27me3_false
chr15	101308800	101309000	bin9089183	H3K27me3_false
chr15	101309000	101309200	bin9089184	H3K27me3_false
chr15	101477600	101477800	bin9089959	H3K27me3_false
chr15	101477800	101478000	bin9089960	H3K27me3_false
chr15	101478000	101478200	bin9089961	H3K27me3_false
chr16	81096400	81096600	bin9335766	H3K27me3_false
chr16	81443000	81443200	bin9337100	H3K27me3_false
chr16	81443200	81443400	bin9337101	H3K27me3_false
chr16	81443400	81443600	bin9337102	H3K27me3_false
chr16	81443600	81443800	bin9337103	H3K27me3_false
chr16	81443800	81444000	bin9337104	H3K27me3_false
chr16	81444000	81444200	bin9337105	H3K27me3_false
chr16	81444200	81444400	bin9337106	H3K27me3_false
chr16	81444400	81444600	bin9337107	H3K27me3_false
chr16	81444600	81444800	bin9337108	H3K27me3_false
chr16	82170000	82170200	bin9340115	H3K27me3_false
chr16	82170200	82170400	bin9340116	H3K27me3_false
chr16	85092400	85092600	bin9352694	H3K27me3_false
chr16	85092600	85092800	bin9352695	H3K27me3_false
chr16	85092800	85093000	bin9352696	H3K27me3_false
chr16	85093000	85093200	bin9352697	H3K27me3_false
chr17	74203200	74203400	bin9615623	H3K27me3_false
chr17	74203400	74203600	bin9615624	H3K27me3_false
chr17	74203600	74203800	bin9615625	H3K27me3_false
chr18	687800	688000	bin9653630	H3K27me3_false
chr18	688000	688200	bin9653631	H3K27me3_false
chr18	688200	688400	bin9653632	H3K27me3_false
chr18	688400	688600	bin9653633	H3K27me3_false
chr18	688600	688800	bin9653634	H3K27me3_false
chr18	23587000	23587200	bin9715885	H3K27me3_false
chr18	23587200	23587400	bin9715886	H3K27me3_false
chr18	34978200	34978400	bin9762786	H3K27me3_false
chr18	34978400	34978600	bin9762787	H3K27me3_false
chr18	34978600	34978800	bin9762788	H3K27me3_false
chr18	34978800	34979000	bin9762789	H3K27me3_false
chr18	34979000	34979200	bin9762790	H3K27me3_false
chr18	34979200	34979400	bin9762791	H3K27me3_false
chr19	50481200	50481400	bin10333702	H3K27me3_false
chr19	50481400	50481600	bin10333703	H3K27me3_false
chr19	50481600	50481800	bin10333704	H3K27me3_false
chr19	50481800	50482000	bin10333705	H3K27me3_false
chr19	50482000	50482200	bin10333706	H3K27me3_false
chr19	50482200	50482400	bin10333707	H3K27me3_false
chr19	50482400	50482600	bin10333708	H3K27me3_false
chr19	50482600	50482800	bin10333709	H3K27me3_false
chr19	50482800	50483000	bin10333710	H3K27me3_false
chr19	50483000	50483200	bin10333711	H3K27me3_false
chr2	676600	676800	bin846470	H3K27me3_false
chr2	676800	677000	bin846471	H3K27me3_false
chr2	677000	677200	bin846472	H3K27me3_false
chr2	677200	677400	bin846473	H3K27me3_false
chr2	96967800	96968000	bin1202862	H3K27me3_false
chr2	96968000	96968200	bin1202863	H3K27me3_false
chr2	96968200	96968400	bin1202864	H3K27me3_false
chr2	96968400	96968600	bin1202865	H3K27me3_false
chr2	96968600	96968800	bin1202866	H3K27me3_false
chr2	96968800	96969000	bin1202867	H3K27me3_false
chr2	96969000	96969200	bin1202868	H3K27me3_false
chr2	96969200	96969400	bin1202869	H3K27me3_false
chr2	96969400	96969600	bin1202870	H3K27me3_false
chr2	96969600	96969800	bin1202871	H3K27me3_false
chr2	148644200	148644400	bin1393190	H3K27me3_false
chr2	148644400	148644600	bin1393191	H3K27me3_false
chr2	148644600	148644800	bin1393192	H3K27me3_false
chr20	63520200	63520400	bin10188616	H3K27me3_false
chr20	63520400	63520600	bin10188617	H3K27me3_false
chr20	63520600	63520800	bin10188618	H3K27me3_false
chr21	33642600	33642800	bin10579988	H3K27me3_false
chr21	33642800	33643000	bin10579989	H3K27me3_false
chr21	33643000	33643200	bin10579990	H3K27me3_false
chr21	33643200	33643400	bin10579991	H3K27me3_false
chr22	19144400	19144600	bin10384734	H3K27me3_false
chr22	19144600	19144800	bin10384735	H3K27me3_false
chr22	19144800	19145000	bin10384736	H3K27me3_false
chr22	19166600	19166800	bin10384801	H3K27me3_false
chr22	19166800	19167000	bin10384802	H3K27me3_false
chr22	19167000	19167200	bin10384803	H3K27me3_false
chr22	19167200	19167400	bin10384804	H3K27me3_false
chr22	19167400	19167600	bin10384805	H3K27me3_false
chr22	19167600	19167800	bin10384806	H3K27me3_false
chr22	19167800	19168000	bin10384807	H3K27me3_false
chr22	19168000	19168200	bin10384808	H3K27me3_false
chr22	19168200	19168400	bin10384809	H3K27me3_false
chr22	19168400	19168600	bin10384810	H3K27me3_false
chr22	19168600	19168800	bin10384811	H3K27me3_false
chr22	19168800	19169000	bin10384812	H3K27me3_false
chr22	19169000	19169200	bin10384813	H3K27me3_false
chr22	19169200	19169400	bin10384814	H3K27me3_false
chr22	19169400	19169600	bin10384815	H3K27me3_false
chr22	19169600	19169800	bin10384816	H3K27me3_false
chr22	19169800	19170000	bin10384817	H3K27me3_false
chr22	19170000	19170200	bin10384818	H3K27me3_false
chr22	19170200	19170400	bin10384819	H3K27me3_false
chr22	19170400	19170600	bin10384820	H3K27me3_false
chr22	19170600	19170800	bin10384821	H3K27me3_false
chr22	19179600	19179800	bin10384863	H3K27me3_false
chr22	19179800	19180000	bin10384864	H3K27me3_false
chr22	19180000	19180200	bin10384865	H3K27me3_false
chr22	19180200	19180400	bin10384866	H3K27me3_false
chr22	19180400	19180600	bin10384867	H3K27me3_false
chr22	19180600	19180800	bin10384868	H3K27me3_false
chr22	19180800	19181000	bin10384869	H3K27me3_false
chr22	19181000	19181200	bin10384870	H3K27me3_false
chr22	19181200	19181400	bin10384871	H3K27me3_false
chr22	19181400	19181600	bin10384872	H3K27me3_false
chr22	19181600	19181800	bin10384873	H3K27me3_false
chr22	19181800	19182000	bin10384874	H3K27me3_false
chr22	19182000	19182200	bin10384875	H3K27me3_false
chr22	19182200	19182400	bin10384876	H3K27me3_false
chr22	19182400	19182600	bin10384877	H3K27me3_false
chr22	19182600	19182800	bin10384878	H3K27me3_false
chr22	19182800	19183000	bin10384879	H3K27me3_false
chr22	19183000	19183200	bin10384880	H3K27me3_false
chr22	19183200	19183400	bin10384881	H3K27me3_false
chr22	19183400	19183600	bin10384882	H3K27me3_false
chr22	19183600	19183800	bin10384883	H3K27me3_false
chr22	19183800	19184000	bin10384884	H3K27me3_false
chr22	19184000	19184200	bin10384885	H3K27me3_false
chr22	19184200	19184400	bin10384886	H3K27me3_false
chr22	19184400	19184600	bin10384887	H3K27me3_false
chr22	19184600	19184800	bin10384888	H3K27me3_false
chr22	19184800	19185000	bin10384889	H3K27me3_false
chr22	19185000	19185200	bin10384890	H3K27me3_false
chr22	19185200	19185400	bin10384891	H3K27me3_false
chr22	19185600	19185800	bin10384892	H3K27me3_false
chr22	19185800	19186000	bin10384893	H3K27me3_false
chr22	19186000	19186200	bin10384894	H3K27me3_false
chr22	19186200	19186400	bin10384895	H3K27me3_false
chr22	19706800	19707000	bin10386763	H3K27me3_false
chr22	19707000	19707200	bin10386764	H3K27me3_false
chr22	19707200	19707400	bin10386765	H3K27me3_false
chr22	19707400	19707600	bin10386766	H3K27me3_false
chr22	19707600	19707800	bin10386767	H3K27me3_false
chr22	19707800	19708000	bin10386768	H3K27me3_false
chr22	19708000	19708200	bin10386769	H3K27me3_false
chr22	19708200	19708400	bin10386770	H3K27me3_false
chr22	19708400	19708600	bin10386771	H3K27me3_false
chr22	19708600	19708800	bin10386772	H3K27me3_false
chr22	19708800	19709000	bin10386773	H3K27me3_false
chr22	19709000	19709200	bin10386774	H3K27me3_false
chr22	19709200	19709400	bin10386775	H3K27me3_false
chr22	19709400	19709600	bin10386776	H3K27me3_false
chr22	19709600	19709800	bin10386777	H3K27me3_false
chr22	19709800	19710000	bin10386778	H3K27me3_false
chr22	19710000	19710200	bin10386779	H3K27me3_false
chr22	19710200	19710400	bin10386780	H3K27me3_false
chr22	19710400	19710600	bin10386781	H3K27me3_false
chr22	19710600	19710800	bin10386782	H3K27me3_false
chr22	19710800	19711000	bin10386783	H3K27me3_false
chr22	19711000	19711200	bin10386784	H3K27me3_false
chr22	19711200	19711400	bin10386785	H3K27me3_false
chr22	19711400	19711600	bin10386786	H3K27me3_false
chr22	19711600	19711800	bin10386787	H3K27me3_false
chr22	19711800	19712000	bin10386788	H3K27me3_false
chr22	19712000	19712200	bin10386789	H3K27me3_false
chr22	19712200	19712400	bin10386790	H3K27me3_false
chr22	19712400	19712600	bin10386791	H3K27me3_false
chr22	19712600	19712800	bin10386792	H3K27me3_false
chr22	19712800	19713000	bin10386793	H3K27me3_false
chr22	19713000	19713200	bin10386794	H3K27me3_false
chr22	19713200	19713400	bin10386795	H3K27me3_false
chr22	19713400	19713600	bin10386796	H3K27me3_false
chr22	19713600	19713800	bin10386797	H3K27me3_false
chr22	19713800	19714000	bin10386798	H3K27me3_false
chr22	19714000	19714200	bin10386799	H3K27me3_false
chr22	19714200	19714400	bin10386800	H3K27me3_false
chr22	19714400	19714600	bin10386801	H3K27me3_false
chr22	19714600	19714800	bin10386802	H3K27me3_false
chr22	19714800	19715000	bin10386803	H3K27me3_false
chr22	19715000	19715200	bin10386804	H3K27me3_false
chr22	19715200	19715400	bin10386805	H3K27me3_false
chr22	19715400	19715600	bin10386806	H3K27me3_false
chr22	19715600	19715800	bin10386807	H3K27me3_false
chr22	19756400	19756600	bin10386999	H3K27me3_false
chr22	19756600	19756800	bin10387000	H3K27me3_false
chr22	19756800	19757000	bin10387001	H3K27me3_false
chr22	19757000	19757200	bin10387002	H3K27me3_false
chr22	19757200	19757400	bin10387003	H3K27me3_false
chr22	19757400	19757600	bin10387004	H3K27me3_false
chr22	19757600	19757800	bin10387005	H3K27me3_false
chr22	19757800	19758000	bin10387006	H3K27me3_false
chr22	19758000	19758200	bin10387007	H3K27me3_false
chr22	19758200	19758400	bin10387008	H3K27me3_false
chr22	19758400	19758600	bin10387009	H3K27me3_false
chr22	19758600	19758800	bin10387010	H3K27me3_false
chr22	19758800	19759000	bin10387011	H3K27me3_false
chr22	19759000	19759200	bin10387012	H3K27me3_false
chr22	19759200	19759400	bin10387013	H3K27me3_false
chr22	19759400	19759600	bin10387014	H3K27me3_false
chr22	19760400	19760600	bin10387019	H3K27me3_false
chr22	19760600	19760800	bin10387020	H3K27me3_false
chr22	19760800	19761000	bin10387021	H3K27me3_false
chr22	19761000	19761200	bin10387022	H3K27me3_false
chr22	19761200	19761400	bin10387023	H3K27me3_false
chr22	19761400	19761600	bin10387024	H3K27me3_false
chr22	19761600	19761800	bin10387025	H3K27me3_false
chr22	19761800	19762000	bin10387026	H3K27me3_false
chr22	19762000	19762200	bin10387027	H3K27me3_false
chr22	19762200	19762400	bin10387028	H3K27me3_false
chr22	19762400	19762600	bin10387029	H3K27me3_false
chr22	19762600	19762800	bin10387030	H3K27me3_false
chr22	19762800	19763000	bin10387031	H3K27me3_false
chr22	19763000	19763200	bin10387032	H3K27me3_false
chr22	19763200	19763400	bin10387033	H3K27me3_false
chr22	19763400	19763600	bin10387034	H3K27me3_false
chr22	19763600	19763800	bin10387035	H3K27me3_false
chr22	19763800	19764000	bin10387036	H3K27me3_false
chr22	19764000	19764200	bin10387037	H3K27me3_false
chr22	19764200	19764400	bin10387038	H3K27me3_false
chr22	19764400	19764600	bin10387039	H3K27me3_false
chr22	19764600	19764800	bin10387040	H3K27me3_false
chr22	19764800	19765000	bin10387041	H3K27me3_false
chr22	19765000	19765200	bin10387042	H3K27me3_false
chr22	19765200	19765400	bin10387043	H3K27me3_false
chr22	19765400	19765600	bin10387044	H3K27me3_false
chr22	19765600	19765800	bin10387045	H3K27me3_false
chr22	19765800	19766000	bin10387046	H3K27me3_false
chr22	19766000	19766200	bin10387047	H3K27me3_false
chr22	19766200	19766400	bin10387048	H3K27me3_false
chr22	19766400	19766600	bin10387049	H3K27me3_false
chr22	19766600	19766800	bin10387050	H3K27me3_false
chr22	19766800	19767000	bin10387051	H3K27me3_false
chr22	19767000	19767200	bin10387052	H3K27me3_false
chr22	19767200	19767400	bin10387053	H3K27me3_false
chr22	19767400	19767600	bin10387054	H3K27me3_false
chr22	19767600	19767800	bin10387055	H3K27me3_false
chr22	19767800	19768000	bin10387056	H3K27me3_false
chr22	19768000	19768200	bin10387057	H3K27me3_false
chr22	19768200	19768400	bin10387058	H3K27me3_false
chr22	19768400	19768600	bin10387059	H3K27me3_false
chr22	19769600	19769800	bin10387064	H3K27me3_false
chr22	19769800	19770000	bin10387065	H3K27me3_false
chr22	19770000	19770200	bin10387066	H3K27me3_false
chr22	19770200	19770400	bin10387067	H3K27me3_false
chr22	19770400	19770600	bin10387068	H3K27me3_false
chr22	19770600	19770800	bin10387069	H3K27me3_false
chr22	19770800	19771000	bin10387070	H3K27me3_false
chr22	19771000	19771200	bin10387071	H3K27me3_false
chr22	19771200	19771400	bin10387072	H3K27me3_false
chr22	19772600	19772800	bin10387077	H3K27me3_false
chr22	19772800	19773000	bin10387078	H3K27me3_false
chr22	19773000	19773200	bin10387079	H3K27me3_false
chr22	19773200	19773400	bin10387080	H3K27me3_false
chr22	19773400	19773600	bin10387081	H3K27me3_false
chr22	19773600	19773800	bin10387082	H3K27me3_false
chr22	20390600	20390800	bin10389160	H3K27me3_false
chr22	20390800	20391000	bin10389161	H3K27me3_false
chr22	20391200	20391400	bin10389162	H3K27me3_false
chr22	20391400	20391600	bin10389163	H3K27me3_false
chr22	20391600	20391800	bin10389164	H3K27me3_false
chr22	20393000	20393200	bin10389165	H3K27me3_false
chr22	20393200	20393400	bin10389166	H3K27me3_false
chr22	20393400	20393600	bin10389167	H3K27me3_false
chr22	20432200	20432400	bin10389329	H3K27me3_false
chr22	20432400	20432600	bin10389330	H3K27me3_false
chr22	20432600	20432800	bin10389331	H3K27me3_false
chr22	20433000	20433200	bin10389332	H3K27me3_false
chr22	20433200	20433400	bin10389333	H3K27me3_false
chr22	20433400	20433600	bin10389334	H3K27me3_false
chr22	20433600	20433800	bin10389335	H3K27me3_false
chr22	20433800	20434000	bin10389336	H3K27me3_false
chr22	20434000	20434200	bin10389337	H3K27me3_false
chr22	20434200	20434400	bin10389338	H3K27me3_false
chr22	20434400	20434600	bin10389339	H3K27me3_false
chr22	20434600	20434800	bin10389340	H3K27me3_false
chr22	20434800	20435000	bin10389341	H3K27me3_false
chr22	20435000	20435200	bin10389342	H3K27me3_false
chr22	20435200	20435400	bin10389343	H3K27me3_false
chr22	20435400	20435600	bin10389344	H3K27me3_false
chr22	20435600	20435800	bin10389345	H3K27me3_false
chr22	20435800	20436000	bin10389346	H3K27me3_false
chr22	20436000	20436200	bin10389347	H3K27me3_false
chr22	20436200	20436400	bin10389348	H3K27me3_false
chr22	20436400	20436600	bin10389349	H3K27me3_false
chr22	20436600	20436800	bin10389350	H3K27me3_false
chr22	20436800	20437000	bin10389351	H3K27me3_false
chr22	20437000	20437200	bin10389352	H3K27me3_false
chr22	20437200	20437400	bin10389353	H3K27me3_false
chr22	20437400	20437600	bin10389354	H3K27me3_false
chr22	20437600	20437800	bin10389355	H3K27me3_false
chr22	20437800	20438000	bin10389356	H3K27me3_false
chr22	20438000	20438200	bin10389357	H3K27me3_false
chr22	20438200	20438400	bin10389358	H3K27me3_false
chr22	20438400	20438600	bin10389359	H3K27me3_false
chr22	20438600	20438800	bin10389360	H3K27me3_false
chr22	20438800	20439000	bin10389361	H3K27me3_false
chr22	20439000	20439200	bin10389362	H3K27me3_false
chr22	20439200	20439400	bin10389363	H3K27me3_false
chr22	20439400	20439600	bin10389364	H3K27me3_false
chr22	20439600	20439800	bin10389365	H3K27me3_false
chr22	20439800	20440000	bin10389366	H3K27me3_false
chr22	20440000	20440200	bin10389367	H3K27me3_false
chr22	20440200	20440400	bin10389368	H3K27me3_false
chr22	20440400	20440600	bin10389369	H3K27me3_false
chr22	20440600	20440800	bin10389370	H3K27me3_false
chr22	20440800	20441000	bin10389371	H3K27me3_false
chr22	20441000	20441200	bin10389372	H3K27me3_false
chr22	20441200	20441400	bin10389373	H3K27me3_false
chr22	20441400	20441600	bin10389374	H3K27me3_false
chr22	20441600	20441800	bin10389375	H3K27me3_false
chr22	20441800	20442000	bin10389376	H3K27me3_false
chr22	20442000	20442200	bin10389377	H3K27me3_false
chr22	20442200	20442400	bin10389378	H3K27me3_false
chr22	20442400	20442600	bin10389379	H3K27me3_false
chr22	20442600	20442800	bin10389380	H3K27me3_false
chr22	20446000	20446200	bin10389390	H3K27me3_false
chr22	20446200	20446400	bin10389391	H3K27me3_false
chr22	20446400	20446600	bin10389392	H3K27me3_false
chr22	20446600	20446800	bin10389393	H3K27me3_false
chr22	20446800	20447000	bin10389394	H3K27me3_false
chr22	20447000	20447200	bin10389395	H3K27me3_false
chr22	20447200	20447400	bin10389396	H3K27me3_false
chr22	20447400	20447600	bin10389397	H3K27me3_false
chr22	20462600	20462800	bin10389438	H3K27me3_false
chr22	20462800	20463000	bin10389439	H3K27me3_false
chr22	20463000	20463200	bin10389440	H3K27me3_false
chr22	20463200	20463400	bin10389441	H3K27me3_false
chr22	20463400	20463600	bin10389442	H3K27me3_false
chr22	20463600	20463800	bin10389443	H3K27me3_false
chr22	20463800	20464000	bin10389444	H3K27me3_false
chr22	20464000	20464200	bin10389445	H3K27me3_false
chr22	20464200	20464400	bin10389446	H3K27me3_false
chr22	20464400	20464600	bin10389447	H3K27me3_false
chr22	20464600	20464800	bin10389448	H3K27me3_false
chr22	20464800	20465000	bin10389449	H3K27me3_false
chr22	20465000	20465200	bin10389450	H3K27me3_false
chr22	20465200	20465400	bin10389451	H3K27me3_false
chr22	20465400	20465600	bin10389452	H3K27me3_false
chr22	20465600	20465800	bin10389453	H3K27me3_false
chr22	20465800	20466000	bin10389454	H3K27me3_false
chr22	20587600	20587800	bin10389874	H3K27me3_false
chr22	20587800	20588000	bin10389875	H3K27me3_false
chr22	20588000	20588200	bin10389876	H3K27me3_false
chr22	20588200	20588400	bin10389877	H3K27me3_false
chr22	20588400	20588600	bin10389878	H3K27me3_false
chr22	20588600	20588800	bin10389879	H3K27me3_false
chr22	20589000	20589200	bin10389880	H3K27me3_false
chr22	20589200	20589400	bin10389881	H3K27me3_false
chr22	20589400	20589600	bin10389882	H3K27me3_false
chr22	20589600	20589800	bin10389883	H3K27me3_false
chr22	20589800	20590000	bin10389884	H3K27me3_false
chr22	20590200	20590400	bin10389885	H3K27me3_false
[truncated: 576 more rows]

## Sheet: Table S4
H3K27me3 best hyper parameters
METHOD	Feature	kernel_size	reg_coeff	learning_rate	dropout_rate
CNN	CnTATACIgG	11	0.0001	0.0001	0.4
CNN	CnTATACseq	9	0.0001	0.0001	0.5
CNN	CnTATAC	5	0.01	0.0001	0.4
CNN	CnTIgG	7	0.1	0.001	0.1
CNN	CnTonly	9	0.0001	0.0001	0.5
CNN	onehot	9	0.0001	0.0001	0.4
GRU	CnTATACIgG	NA	0.0001	0.0001	NA
GRU	CnTATACseq	NA	0.0001	0.0001	NA
GRU	CnTATAC	NA	0.001	0.0001	NA
GRU	CnTIgG	NA	0.0001	0.0001	NA
GRU	CnTonly	NA	0.0001	0.1	NA
GRU	onehot	NA	0.0001	0.0001	NA
MLP	CnTATACIgG	NA	0.01	0.001	NA
MLP	CnTATACseq	NA	0.01	0.0001	NA
MLP	CnTATAC	NA	0.0001	0.0001	NA
MLP	CnTIgG	NA	0.1	0.001	NA
MLP	CnTonly	NA	0.0001	0.0001	NA
MLP	onehot	NA	0.01	0.0001	NA
RNN	CnTATACIgG	NA	0.001	0.001	NA
RNN	CnTATACseq	NA	0.01	0.0001	NA
RNN	CnTATAC	NA	0.001	0.0001	NA
RNN	CnTIgG	NA	0.0001	0.001	NA
RNN	CnTonly	NA	0.001	0.0001	NA
RNN	onehot	NA	0.0001	0.0001	NA

## Sheet: Table S5
chromosome	start	end	binID	region category
chr1	1325600	1325800	bin1790	H3K27ac_true
chr1	6624000	6624200	bin22812	H3K27ac_true
chr1	10430400	10430600	bin37455	H3K27ac_true
chr1	10430600	10430800	bin37456	H3K27ac_true
chr1	11690600	11690800	bin42612	H3K27ac_true
chr1	11690800	11691000	bin42613	H3K27ac_true
chr1	15848600	15848800	bin56691	H3K27ac_true
chr1	15848800	15849000	bin56692	H3K27ac_true
chr1	15849000	15849200	bin56693	H3K27ac_true
chr1	26110000	26110200	bin94824	H3K27ac_true
chr1	26110200	26110400	bin94825	H3K27ac_true
chr1	26899400	26899600	bin97700	H3K27ac_true
chr1	26899600	26899800	bin97701	H3K27ac_true
chr1	26899800	26900000	bin97702	H3K27ac_true
chr1	26900000	26900200	bin97703	H3K27ac_true
chr1	26900200	26900400	bin97704	H3K27ac_true
chr1	27603000	27603200	bin100217	H3K27ac_true
chr1	35719800	35720000	bin130920	H3K27ac_true
chr1	38990200	38990400	bin144146	H3K27ac_true
chr1	40374600	40374800	bin149136	H3K27ac_true
chr1	53237600	53237800	bin197003	H3K27ac_true
chr1	63524000	63524200	bin239803	H3K27ac_true
chr1	67684000	67684200	bin256726	H3K27ac_true
chr1	67684200	67684400	bin256727	H3K27ac_true
chr1	67684400	67684600	bin256728	H3K27ac_true
chr1	70204600	70204800	bin266710	H3K27ac_true
chr1	70204800	70205000	bin266711	H3K27ac_true
chr1	70205000	70205200	bin266712	H3K27ac_true
chr1	70206400	70206600	bin266719	H3K27ac_true
chr1	70206600	70206800	bin266720	H3K27ac_true
chr1	70411600	70411800	bin267540	H3K27ac_true
chr1	70411800	70412000	bin267541	H3K27ac_true
chr1	74733400	74733600	bin284948	H3K27ac_true
chr1	74733600	74733800	bin284949	H3K27ac_true
chr1	74733800	74734000	bin284950	H3K27ac_true
chr1	74734000	74734200	bin284951	H3K27ac_true
chr1	78005400	78005600	bin297582	H3K27ac_true
chr1	78005600	78005800	bin297583	H3K27ac_true
chr1	78005800	78006000	bin297584	H3K27ac_true
chr1	84507200	84507400	bin323035	H3K27ac_true
chr1	84507400	84507600	bin323036	H3K27ac_true
chr1	88891800	88892000	bin340479	H3K27ac_true
chr1	99849400	99849600	bin382941	H3K27ac_true
chr1	100134000	100134200	bin384031	H3K27ac_true
chr1	107055800	107056000	bin409368	H3K27ac_true
chr1	108559200	108559400	bin414745	H3K27ac_true
chr1	145996000	145996200	bin459803	H3K27ac_true
chr1	145996200	145996400	bin459804	H3K27ac_true
chr1	145996400	145996600	bin459805	H3K27ac_true
chr1	150066400	150066600	bin463803	H3K27ac_true
chr1	150066600	150066800	bin463804	H3K27ac_true
chr1	150293000	150293200	bin464661	H3K27ac_true
chr1	150696000	150696200	bin465932	H3K27ac_true
chr1	150696200	150696400	bin465933	H3K27ac_true
chr1	150696400	150696600	bin465934	H3K27ac_true
chr1	150875600	150875800	bin466542	H3K27ac_true
chr1	150875800	150876000	bin466543	H3K27ac_true
chr1	151007200	151007400	bin466999	H3K27ac_true
chr1	151007400	151007600	bin467000	H3K27ac_true
chr1	151007600	151007800	bin467001	H3K27ac_true
chr1	151199000	151199200	bin467656	H3K27ac_true
chr1	151199200	151199400	bin467657	H3K27ac_true
chr1	151371600	151371800	bin468239	H3K27ac_true
chr1	155978000	155978200	bin484016	H3K27ac_true
chr1	155978200	155978400	bin484017	H3K27ac_true
chr1	155978400	155978600	bin484018	H3K27ac_true
chr1	155978600	155978800	bin484019	H3K27ac_true
chr1	155978800	155979000	bin484020	H3K27ac_true
chr1	155979000	155979200	bin484021	H3K27ac_true
chr1	155979200	155979400	bin484022	H3K27ac_true
chr1	155979400	155979600	bin484023	H3K27ac_true
chr1	156283400	156283600	bin485165	H3K27ac_true
chr1	156294600	156294800	bin485210	H3K27ac_true
chr1	158685600	158685800	bin493982	H3K27ac_true
chr1	158687000	158687200	bin493989	H3K27ac_true
chr1	158687200	158687400	bin493990	H3K27ac_true
chr1	161159600	161159800	bin503296	H3K27ac_true
chr1	161313400	161313600	bin503883	H3K27ac_true
chr1	161313600	161313800	bin503884	H3K27ac_true
chr1	161313800	161314000	bin503885	H3K27ac_true
chr1	161504400	161504600	bin504330	H3K27ac_true
chr1	161504600	161504800	bin504331	H3K27ac_true
chr1	167938000	167938200	bin529638	H3K27ac_true
chr1	186376600	186376800	bin601620	H3K27ac_true
chr1	193120800	193121000	bin628463	H3K27ac_true
chr1	193121000	193121200	bin628464	H3K27ac_true
chr1	193121200	193121400	bin628465	H3K27ac_true
chr1	198638600	198638800	bin649695	H3K27ac_true
chr1	198638800	198639000	bin649696	H3K27ac_true
chr1	211381800	211382000	bin699588	H3K27ac_true
chr1	211382000	211382200	bin699589	H3K27ac_true
chr1	211382200	211382400	bin699590	H3K27ac_true
chr1	220093000	220093200	bin735367	H3K27ac_true
chr1	220093200	220093400	bin735368	H3K27ac_true
chr1	224433600	224433800	bin751732	H3K27ac_true
chr1	224433800	224434000	bin751733	H3K27ac_true
chr1	225998600	225998800	bin757348	H3K27ac_true
chr1	227317600	227317800	bin762552	H3K27ac_true
chr2	265600	265800	bin844721	H3K27ac_true
chr2	3576200	3576400	bin858419	H3K27ac_true
chr2	17754800	17755000	bin917850	H3K27ac_true
chr2	24359800	24360000	bin945443	H3K27ac_true
chr2	24360000	24360200	bin945444	H3K27ac_true
chr2	24360200	24360400	bin945445	H3K27ac_true
chr2	24360400	24360600	bin945446	H3K27ac_true
chr2	27217400	27217600	bin956804	H3K27ac_true
chr2	27217600	27217800	bin956805	H3K27ac_true
chr2	27217800	27218000	bin956806	H3K27ac_true
chr2	27409000	27409200	bin957536	H3K27ac_true
chr2	27409200	27409400	bin957537	H3K27ac_true
chr2	27427600	27427800	bin957590	H3K27ac_true
chr2	27490800	27491000	bin957850	H3K27ac_true
chr2	27663400	27663600	bin958501	H3K27ac_true
chr2	32040400	32040600	bin976526	H3K27ac_true
chr2	38376200	38376400	bin1001097	H3K27ac_true
chr2	53969800	53970000	bin1064371	H3K27ac_true
chr2	55231400	55231600	bin1069670	H3K27ac_true
chr2	61888400	61888600	bin1096027	H3K27ac_true
chr2	68063400	68063600	bin1120444	H3K27ac_true
chr2	69894400	69894600	bin1127793	H3K27ac_true
chr2	70087200	70087400	bin1128572	H3K27ac_true
chr2	73926200	73926400	bin1142977	H3K27ac_true
chr2	73926400	73926600	bin1142978	H3K27ac_true
chr2	74177800	74178000	bin1144036	H3K27ac_true
chr2	74178000	74178200	bin1144037	H3K27ac_true
chr2	74178200	74178400	bin1144038	H3K27ac_true
chr2	85596400	85596600	bin1189293	H3K27ac_true
chr2	85596600	85596800	bin1189294	H3K27ac_true
chr2	86107000	86107200	bin1191407	H3K27ac_true
chr2	98445800	98446000	bin1206167	H3K27ac_true
chr2	105330000	105330200	bin1234218	H3K27ac_true
chr2	108450000	108450200	bin1245769	H3K27ac_true
chr2	161309200	161309400	bin1443284	H3K27ac_true
chr2	171998800	171999000	bin1486640	H3K27ac_true
chr2	187553400	187553600	bin1548759	H3K27ac_true
chr2	187553600	187553800	bin1548760	H3K27ac_true
chr2	187553800	187554000	bin1548761	H3K27ac_true
chr2	187554000	187554200	bin1548762	H3K27ac_true
chr2	187554200	187554400	bin1548763	H3K27ac_true
chr2	187554400	187554600	bin1548764	H3K27ac_true
chr2	188292200	188292400	bin1551481	H3K27ac_true
chr2	189581000	189581200	bin1556713	H3K27ac_true
chr2	189581200	189581400	bin1556714	H3K27ac_true
chr2	189581400	189581600	bin1556715	H3K27ac_true
chr2	189581600	189581800	bin1556716	H3K27ac_true
chr2	189581800	189582000	bin1556717	H3K27ac_true
chr2	190319000	190319200	bin1559484	H3K27ac_true
chr2	190319200	190319400	bin1559485	H3K27ac_true
chr2	190319400	190319600	bin1559486	H3K27ac_true
chr2	190649800	190650000	bin1560812	H3K27ac_true
chr2	190650000	190650200	bin1560813	H3K27ac_true
chr2	191014800	191015000	bin1562372	H3K27ac_true
chr2	191015000	191015200	bin1562373	H3K27ac_true
chr2	191847600	191847800	bin1566000	H3K27ac_true
chr2	191847800	191848000	bin1566001	H3K27ac_true
chr2	195657600	195657800	bin1581156	H3K27ac_true
chr2	197515200	197515400	bin1588516	H3K27ac_true
chr2	201070600	201070800	bin1602812	H3K27ac_true
chr2	201070800	201071000	bin1602813	H3K27ac_true
chr2	201072000	201072200	bin1602819	H3K27ac_true
chr2	201072200	201072400	bin1602820	H3K27ac_true
chr2	201233200	201233400	bin1603369	H3K27ac_true
chr2	202911800	202912000	bin1609376	H3K27ac_true
chr2	202912000	202912200	bin1609377	H3K27ac_true
chr2	208266800	208267000	bin1631060	H3K27ac_true
chr2	208267000	208267200	bin1631061	H3K27ac_true
chr2	208267200	208267400	bin1631062	H3K27ac_true
chr2	219207600	219207800	bin1675425	H3K27ac_true
chr2	219418000	219418200	bin1676282	H3K27ac_true
chr2	219499400	219499600	bin1676671	H3K27ac_true
chr2	219499600	219499800	bin1676672	H3K27ac_true
chr2	219499800	219500000	bin1676673	H3K27ac_true
chr2	222861400	222861600	bin1691021	H3K27ac_true
chr2	230416200	230416400	bin1721551	H3K27ac_true
chr2	230416400	230416600	bin1721552	H3K27ac_true
chr2	230416600	230416800	bin1721553	H3K27ac_true
chr2	230713800	230714000	bin1722472	H3K27ac_true
chr2	231463400	231463600	bin1725470	H3K27ac_true
chr2	235494800	235495000	bin1741133	H3K27ac_true
chr2	238241000	238241200	bin1753039	H3K27ac_true
chr2	241314000	241314200	bin1766229	H3K27ac_true
chr2	241314200	241314400	bin1766230	H3K27ac_true
chr2	241314400	241314600	bin1766231	H3K27ac_true
chr2	241314600	241314800	bin1766232	H3K27ac_true
chr2	241637600	241637800	bin1767494	H3K27ac_true
chr2	241637800	241638000	bin1767495	H3K27ac_true
chr2	241638000	241638200	bin1767496	H3K27ac_true
chr3	12558000	12558200	bin1819485	H3K27ac_true
chr3	17740800	17741000	bin1839526	H3K27ac_true
chr3	17741000	17741200	bin1839527	H3K27ac_true
chr3	17741200	17741400	bin1839528	H3K27ac_true
chr3	19946000	19946200	bin1848126	H3K27ac_true
chr3	20039200	20039400	bin1848471	H3K27ac_true
chr3	25789000	25789200	bin1871301	H3K27ac_true
chr3	25789200	25789400	bin1871302	H3K27ac_true
chr3	33718400	33718600	bin1902466	H3K27ac_true
chr3	33718600	33718800	bin1902467	H3K27ac_true
chr3	33718800	33719000	bin1902468	H3K27ac_true
chr3	43689800	43690000	bin1940841	H3K27ac_true
chr3	47781200	47781400	bin1956666	H3K27ac_true
chr3	48187200	48187400	bin1957972	H3K27ac_true
chr3	48439200	48439400	bin1958850	H3K27ac_true
chr3	48446800	48447000	bin1958879	H3K27ac_true
chr3	48685200	48685400	bin1959829	H3K27ac_true
chr3	48846800	48847000	bin1960293	H3K27ac_true
chr3	48919400	48919600	bin1960467	H3K27ac_true
chr3	49028400	49028600	bin1960875	H3K27ac_true
chr3	49028600	49028800	bin1960876	H3K27ac_true
chr3	49093000	49093200	bin1961052	H3K27ac_true
chr3	49093200	49093400	bin1961053	H3K27ac_true
chr3	49105000	49105200	bin1961100	H3K27ac_true
chr3	49105200	49105400	bin1961101	H3K27ac_true
chr3	49119800	49120000	bin1961167	H3K27ac_true
chr3	49120000	49120200	bin1961168	H3K27ac_true
chr3	49120200	49120400	bin1961169	H3K27ac_true
chr3	49120400	49120600	bin1961170	H3K27ac_true
chr3	49166800	49167000	bin1961345	H3K27ac_true
chr3	49167000	49167200	bin1961346	H3K27ac_true
chr3	49674800	49675000	bin1962912	H3K27ac_true
chr3	49724600	49724800	bin1963083	H3K27ac_true
chr3	49724800	49725000	bin1963084	H3K27ac_true
chr3	52154600	52154800	bin1971479	H3K27ac_true
chr3	52239200	52239400	bin1971793	H3K27ac_true
chr3	52239400	52239600	bin1971794	H3K27ac_true
chr3	52239600	52239800	bin1971795	H3K27ac_true
chr3	52279600	52279800	bin1971956	H3K27ac_true
chr3	52534000	52534200	bin1973097	H3K27ac_true
chr3	52707000	52707200	bin1973734	H3K27ac_true
chr3	52769800	52770000	bin1973892	H3K27ac_true
chr3	57757800	57758000	bin1994450	H3K27ac_true
chr3	69740000	69740200	bin2044411	H3K27ac_true
chr3	69740200	69740400	bin2044412	H3K27ac_true
chr3	69740400	69740600	bin2044413	H3K27ac_true
chr3	72446200	72446400	bin2056287	H3K27ac_true
chr3	72447600	72447800	bin2056294	H3K27ac_true
chr3	72995800	72996000	bin2058504	H3K27ac_true
chr3	72997400	72997600	bin2058509	H3K27ac_true
chr3	81762000	81762200	bin2092059	H3K27ac_true
chr3	81762200	81762400	bin2092060	H3K27ac_true
chr3	81762400	81762600	bin2092061	H3K27ac_true
chr3	81762600	81762800	bin2092062	H3K27ac_true
chr3	88149000	88149200	bin2117221	H3K27ac_true
chr3	100259800	100260000	bin2148689	H3K27ac_true
chr3	100260000	100260200	bin2148690	H3K27ac_true
chr3	100260200	100260400	bin2148691	H3K27ac_true
chr3	100260400	100260600	bin2148692	H3K27ac_true
chr3	100333800	100334000	bin2149002	H3K27ac_true
chr3	100335200	100335400	bin2149008	H3K27ac_true
chr3	100335400	100335600	bin2149009	H3K27ac_true
chr3	100335600	100335800	bin2149010	H3K27ac_true
chr3	100402200	100402400	bin2149278	H3K27ac_true
chr3	101512200	101512400	bin2153295	H3K27ac_true
chr3	101512400	101512600	bin2153296	H3K27ac_true
chr3	101512600	101512800	bin2153297	H3K27ac_true
chr3	101512800	101513000	bin2153298	H3K27ac_true
chr3	101513000	101513200	bin2153299	H3K27ac_true
chr3	101513200	101513400	bin2153300	H3K27ac_true
chr3	101513400	101513600	bin2153301	H3K27ac_true
chr3	101561000	101561200	bin2153414	H3K27ac_true
chr3	101561200	101561400	bin2153415	H3K27ac_true
chr3	101561600	101561800	bin2153416	H3K27ac_true
chr3	122515600	122515800	bin2234902	H3K27ac_true
chr3	122515800	122516000	bin2234903	H3K27ac_true
chr3	125519400	125519600	bin2247388	H3K27ac_true
chr3	128492000	128492200	bin2258530	H3K27ac_true
chr3	128650200	128650400	bin2259183	H3K27ac_true
chr3	128650400	128650600	bin2259184	H3K27ac_true
chr3	128725400	128725600	bin2259357	H3K27ac_true
chr3	129184600	129184800	bin2260918	H3K27ac_true
chr3	129184800	129185000	bin2260919	H3K27ac_true
chr3	130849600	130849800	bin2266519	H3K27ac_true
chr3	130849800	130850000	bin2266520	H3K27ac_true
chr3	130850000	130850200	bin2266521	H3K27ac_true
chr3	130850200	130850400	bin2266522	H3K27ac_true
chr3	142578000	142578200	bin2311508	H3K27ac_true
chr3	150547600	150547800	bin2343598	H3K27ac_true
chr3	150604000	150604200	bin2343815	H3K27ac_true
chr3	154324200	154324400	bin2358361	H3K27ac_true
chr3	154324400	154324600	bin2358362	H3K27ac_true
chr3	154324600	154324800	bin2358363	H3K27ac_true
chr3	160398400	160398600	bin2381978	H3K27ac_true
chr3	160398600	160398800	bin2381979	H3K27ac_true
chr3	167733800	167734000	bin2409309	H3K27ac_true
chr3	171459400	171459600	bin2424714	H3K27ac_true
chr3	171459600	171459800	bin2424715	H3K27ac_true
chr3	172038800	172039000	bin2427092	H3K27ac_true
chr3	172039000	172039200	bin2427093	H3K27ac_true
chr3	172039200	172039400	bin2427094	H3K27ac_true
chr3	172039400	172039600	bin2427095	H3K27ac_true
chr3	172039600	172039800	bin2427096	H3K27ac_true
chr3	172039800	172040000	bin2427097	H3K27ac_true
chr3	172040000	172040200	bin2427098	H3K27ac_true
chr3	172040200	172040400	bin2427099	H3K27ac_true
chr3	172040400	172040600	bin2427100	H3K27ac_true
chr3	172040600	172040800	bin2427101	H3K27ac_true
chr3	179266600	179266800	bin2456000	H3K27ac_true
chr3	179268000	179268200	bin2456006	H3K27ac_true
chr3	179348600	179348800	bin2456314	H3K27ac_true
chr3	196431400	196431600	bin2523723	H3K27ac_true
chr3	196569800	196570000	bin2524144	H3K27ac_true
chr3	196740800	196741000	bin2524814	H3K27ac_true
chr3	197748400	197748600	bin2528438	H3K27ac_true
chr4	1290600	1290800	bin2533156	H3K27ac_true
chr4	1290800	1291000	bin2533157	H3K27ac_true
chr4	2009400	2009600	bin2536058	H3K27ac_true
chr4	2009600	2009800	bin2536059	H3K27ac_true
chr4	2009800	2010000	bin2536060	H3K27ac_true
chr4	6715000	6715200	bin2553483	H3K27ac_true
chr4	6715200	6715400	bin2553484	H3K27ac_true
chr4	8440200	8440400	bin2560994	H3K27ac_true
chr4	16225400	16225600	bin2589330	H3K27ac_true
chr4	16225600	16225800	bin2589331	H3K27ac_true
chr4	16225800	16226000	bin2589332	H3K27ac_true
chr4	16226000	16226200	bin2589333	H3K27ac_true
chr4	16226200	16226400	bin2589334	H3K27ac_true
chr4	17809600	17809800	bin2595839	H3K27ac_true
chr4	39459600	39459800	bin2683535	H3K27ac_true
chr4	39459800	39460000	bin2683536	H3K27ac_true
chr4	39460000	39460200	bin2683537	H3K27ac_true
chr4	39978200	39978400	bin2685165	H3K27ac_true
chr4	39978400	39978600	bin2685166	H3K27ac_true
chr4	67702200	67702400	bin2780387	H3K27ac_true
chr4	87423000	87423200	bin2852092	H3K27ac_true
chr4	89056600	89056800	bin2858129	H3K27ac_true
chr4	89056800	89057000	bin2858130	H3K27ac_true
chr4	89057000	89057200	bin2858131	H3K27ac_true
chr4	89057200	89057400	bin2858132	H3K27ac_true
chr4	102868200	102868400	bin2911365	H3K27ac_true
chr4	102868400	102868600	bin2911366	H3K27ac_true
chr4	127781600	127781800	bin3006182	H3K27ac_true
chr4	127879800	127880000	bin3006534	H3K27ac_true
chr4	127880200	127880400	bin3006535	H3K27ac_true
chr4	128060200	128060400	bin3007128	H3K27ac_true
chr4	128060400	128060600	bin3007129	H3K27ac_true
chr4	129094600	129094800	bin3010903	H3K27ac_true
chr4	163495000	163495200	bin3144083	H3K27ac_true
chr4	163495200	163495400	bin3144084	H3K27ac_true
chr4	169611600	169611800	bin3167582	H3K27ac_true
chr4	169621000	169621200	bin3167625	H3K27ac_true
chr4	169621200	169621400	bin3167626	H3K27ac_true
chr4	169621400	169621600	bin3167627	H3K27ac_true
chr4	174282600	174282800	bin3185909	H3K27ac_true
chr4	184473400	184473600	bin3228509	H3K27ac_true
chr5	10760600	10760800	bin3292932	H3K27ac_true
chr5	40797000	40797200	bin3406359	H3K27ac_true
chr5	40828600	40828800	bin3406449	H3K27ac_true
chr5	43514800	43515000	bin3415946	H3K27ac_true
chr5	43515000	43515200	bin3415947	H3K27ac_true
chr5	43515200	43515400	bin3415948	H3K27ac_true
chr5	43515400	43515600	bin3415949	H3K27ac_true
chr5	43515600	43515800	bin3415950	H3K27ac_true
chr5	43601600	43601800	bin3416222	H3K27ac_true
chr5	65562800	65563000	bin3483899	H3K27ac_true
chr5	65563000	65563200	bin3483900	H3K27ac_true
chr5	69094600	69094800	bin3498191	H3K27ac_true
chr5	69094800	69095000	bin3498192	H3K27ac_true
chr5	86618600	86618800	bin3559298	H3K27ac_true
chr5	91382200	91382400	bin3578118	H3K27ac_true
chr5	131166200	131166400	bin3731523	H3K27ac_true
chr5	131170000	131170200	bin3731539	H3K27ac_true
chr5	131796000	131796200	bin3733888	H3K27ac_true
chr5	132556600	132556800	bin3736724	H3K27ac_true
chr5	132556800	132557000	bin3736725	H3K27ac_true
chr5	132831400	132831600	bin3737860	H3K27ac_true
chr5	134370800	134371000	bin3744141	H3K27ac_true
chr5	134371000	134371200	bin3744142	H3K27ac_true
chr5	134412200	134412400	bin3744300	H3K27ac_true
chr5	134412400	134412600	bin3744301	H3K27ac_true
chr5	134412600	134412800	bin3744302	H3K27ac_true
chr5	134648200	134648400	bin3745165	H3K27ac_true
chr5	138753200	138753400	bin3761328	H3K27ac_true
chr5	138753400	138753600	bin3761329	H3K27ac_true
chr5	138753600	138753800	bin3761330	H3K27ac_true
chr5	138753800	138754000	bin3761331	H3K27ac_true
chr5	138754000	138754200	bin3761332	H3K27ac_true
chr5	138754200	138754400	bin3761333	H3K27ac_true
chr5	142109600	142109800	bin3774420	H3K27ac_true
chr5	149550600	149550800	bin3804782	H3K27ac_true
chr5	149550800	149551000	bin3804783	H3K27ac_true
chr5	149551000	149551200	bin3804784	H3K27ac_true
chr5	149551200	149551400	bin3804785	H3K27ac_true
chr5	150701400	150701600	bin3809751	H3K27ac_true
chr5	154850800	154851000	bin3826129	H3K27ac_true
chr5	163436600	163436800	bin3860167	H3K27ac_true
chr5	163502400	163502600	bin3860447	H3K27ac_true
chr5	163502600	163502800	bin3860448	H3K27ac_true
chr5	163502800	163503000	bin3860449	H3K27ac_true
chr5	163503000	163503200	bin3860450	H3K27ac_true
chr5	177021600	177021800	bin3915842	H3K27ac_true
chr5	177021800	177022000	bin3915843	H3K27ac_true
chr5	177022000	177022200	bin3915844	H3K27ac_true
chr5	177517400	177517600	bin3917716	H3K27ac_true
chr5	178626200	178626400	bin3920551	H3K27ac_true
chr6	3024800	3025000	bin3941994	H3K27ac_true
chr6	3025000	3025200	bin3941995	H3K27ac_true
chr6	3025200	3025400	bin3941996	H3K27ac_true
chr6	3075800	3076000	bin3942155	H3K27ac_true
chr6	11778000	11778200	bin3977399	H3K27ac_true
chr6	11778200	11778400	bin3977400	H3K27ac_true
chr6	20534200	20534400	bin4012773	H3K27ac_true
chr6	26057200	26057400	bin4035359	H3K27ac_true
chr6	26155400	26155600	bin4035746	H3K27ac_true
chr6	26155600	26155800	bin4035747	H3K27ac_true
chr6	26198200	26198400	bin4035919	H3K27ac_true
chr6	27472000	27472200	bin4039243	H3K27ac_true
chr6	28399400	28399600	bin4042808	H3K27ac_true
chr6	34887000	34887200	bin4064130	H3K27ac_true
chr6	36875600	36875800	bin4071964	H3K27ac_true
chr6	36875800	36876000	bin4071965	H3K27ac_true
chr6	36876000	36876200	bin4071966	H3K27ac_true
chr6	37169000	37169200	bin4073055	H3K27ac_true
chr6	47476600	47476800	bin4115683	H3K27ac_true
chr6	47476800	47477000	bin4115684	H3K27ac_true
chr6	49635800	49636000	bin4124037	H3K27ac_true
chr6	49636000	49636200	bin4124038	H3K27ac_true
chr6	49636200	49636400	bin4124039	H3K27ac_true
chr6	49636400	49636600	bin4124040	H3K27ac_true
chr6	49636600	49636800	bin4124041	H3K27ac_true
chr6	49636800	49637000	bin4124042	H3K27ac_true
chr6	57045600	57045800	bin4153577	H3K27ac_true
chr6	57046000	57046200	bin4153578	H3K27ac_true
chr6	57046200	57046400	bin4153579	H3K27ac_true
chr6	57046400	57046600	bin4153580	H3K27ac_true
chr6	82246600	82246800	bin4232505	H3K27ac_true
chr6	82246800	82247000	bin4232506	H3K27ac_true
chr6	117601400	117601600	bin4369652	H3K27ac_true
chr6	118893000	118893200	bin4374377	H3K27ac_true
chr6	118893200	118893400	bin4374378	H3K27ac_true
chr6	118893400	118893600	bin4374379	H3K27ac_true
chr6	119148600	119148800	bin4375361	H3K27ac_true
chr6	119148800	119149000	bin4375362	H3K27ac_true
chr6	119149000	119149200	bin4375363	H3K27ac_true
chr6	119149200	119149400	bin4375364	H3K27ac_true
chr6	119149400	119149600	bin4375365	H3K27ac_true
chr6	119149600	119149800	bin4375366	H3K27ac_true
chr6	125985400	125985600	bin4402563	H3K27ac_true
chr6	125985600	125985800	bin4402564	H3K27ac_true
chr6	125985800	125986000	bin4402565	H3K27ac_true
chr6	131638200	131638400	bin4425786	H3K27ac_true
chr6	135180200	135180400	bin4440392	H3K27ac_true
chr6	135180400	135180600	bin4440393	H3K27ac_true
chr6	135180600	135180800	bin4440394	H3K27ac_true
chr6	147204800	147205000	bin4488702	H3K27ac_true
chr6	154511600	154511800	bin4517439	H3K27ac_true
chr6	170583600	170583800	bin4581980	H3K27ac_true
chr6	170583800	170584000	bin4581981	H3K27ac_true
chr7	2314600	2314800	bin4591228	H3K27ac_true
chr7	6271600	6271800	bin4604632	H3K27ac_true
chr7	6271800	6272000	bin4604633	H3K27ac_true
chr7	6272000	6272200	bin4604634	H3K27ac_true
chr7	6272200	6272400	bin4604635	H3K27ac_true
chr7	8261800	8262000	bin4610924	H3K27ac_true
chr7	12685800	12686000	bin4628344	H3K27ac_true
chr7	22823400	22823600	bin4669848	H3K27ac_true
chr7	22823600	22823800	bin4669849	H3K27ac_true
chr7	23182800	23183000	bin4671227	H3K27ac_true
chr7	27738800	27739000	bin4689369	H3K27ac_true
chr7	27739000	27739200	bin4689370	H3K27ac_true
chr7	32892000	32892200	bin4709631	H3K27ac_true
chr7	56105600	56105800	bin4798149	H3K27ac_true
chr7	56105800	56106000	bin4798150	H3K27ac_true
chr7	75879800	75880000	bin4826427	H3K27ac_true
chr7	87877200	87877400	bin4871640	H3K27ac_true
chr7	90347600	90347800	bin4880966	H3K27ac_true
chr7	92837400	92837600	bin4890620	H3K27ac_true
chr7	103345400	103345600	bin4925865	H3K27ac_true
chr7	103345800	103346000	bin4925866	H3K27ac_true
chr7	106866200	106866400	bin4939538	H3K27ac_true
chr7	107580600	107580800	bin4942282	H3K27ac_true
chr7	130050800	130051000	bin5031686	H3K27ac_true
chr7	130051000	130051200	bin5031687	H3K27ac_true
chr7	130051200	130051400	bin5031688	H3K27ac_true
chr7	130051400	130051600	bin5031689	H3K27ac_true
chr7	130051600	130051800	bin5031690	H3K27ac_true
chr7	130051800	130052000	bin5031691	H3K27ac_true
chr7	130052000	130052200	bin5031692	H3K27ac_true
chr7	130052400	130052600	bin5031693	H3K27ac_true
chr8	15540200	15540400	bin5664521	H3K27ac_true
chr8	15540400	15540600	bin5664522	H3K27ac_true
chr8	15540600	15540800	bin5664523	H3K27ac_true
chr8	15540800	15541000	bin5664524	H3K27ac_true
chr8	30658800	30659000	bin5726887	H3K27ac_true
chr8	37763000	37763200	bin5755433	H3K27ac_true
chr8	37763200	37763400	bin5755434	H3K27ac_true
chr8	37763400	37763600	bin5755435	H3K27ac_true
chr8	38104400	38104600	bin5756522	H3K27ac_true
chr8	42271600	42271800	bin5772424	H3K27ac_true
chr8	42271800	42272000	bin5772425	H3K27ac_true
chr8	42272000	42272200	bin5772426	H3K27ac_true
chr8	42540800	42541000	bin5773525	H3K27ac_true
chr8	55879400	55879600	bin5811063	H3K27ac_true
chr8	55879600	55879800	bin5811064	H3K27ac_true
chr8	55879800	55880000	bin5811065	H3K27ac_true
chr8	55880000	55880200	bin5811066	H3K27ac_true
chr8	67343800	67344000	bin5856006	H3K27ac_true
chr8	77001400	77001600	bin5893633	H3K27ac_true
chr8	81722200	81722400	bin5912179	H3K27ac_true
chr8	90220400	90220600	bin5944110	H3K27ac_true
chr8	90222200	90222400	bin5944119	H3K27ac_true
chr8	90222400	90222600	bin5944120	H3K27ac_true
chr8	91041400	91041600	bin5947364	H3K27ac_true
chr8	91069000	91069200	bin5947491	H3K27ac_true
chr8	91069200	91069400	bin5947492	H3K27ac_true
chr8	98943400	98943600	bin5978663	H3K27ac_true
chr8	123043400	123043600	bin6076946	H3K27ac_true
chr8	140634800	140635000	bin6150503	H3K27ac_true
chr8	144359000	144359200	bin6166013	H3K27ac_true
chr8	144359200	144359400	bin6166014	H3K27ac_true
chr8	144443400	144443600	bin6166323	H3K27ac_true
chr8	144443600	144443800	bin6166324	H3K27ac_true
chr8	144445200	144445400	bin6166332	H3K27ac_true
chr9	215400	215600	bin6168445	H3K27ac_true
chr9	215600	215800	bin6168446	H3K27ac_true
chr9	215800	216000	bin6168447	H3K27ac_true
chr9	19102800	19103000	bin6243564	H3K27ac_true
chr9	26946000	26946200	bin6273641	H3K27ac_true
chr9	26947600	26947800	bin6273649	H3K27ac_true
chr9	26947800	26948000	bin6273650	H3K27ac_true
chr9	32551600	32551800	bin6295525	H3K27ac_true
chr9	33025800	33026000	bin6297259	H3K27ac_true
chr9	33026000	33026200	bin6297260	H3K27ac_true
chr9	33076000	33076200	bin6297450	H3K27ac_true
chr9	34047800	34048000	bin6299794	H3K27ac_true
chr9	34048000	34048200	bin6299795	H3K27ac_true
chr9	35664400	35664600	bin6305441	H3K27ac_true
chr9	35690200	35690400	bin6305561	H3K27ac_true
chr9	35690400	35690600	bin6305562	H3K27ac_true
chr9	35690600	35690800	bin6305563	H3K27ac_true
chr9	35690800	35691000	bin6305564	H3K27ac_true
chr9	35691000	35691200	bin6305565	H3K27ac_true
chr9	36572600	36572800	bin6308907	H3K27ac_true
chr9	36572800	36573000	bin6308908	H3K27ac_true
chr9	36573000	36573200	bin6308909	H3K27ac_true
chr9	70258400	70258600	bin6324797	H3K27ac_true
chr9	73152000	73152200	bin6336583	H3K27ac_true
chr9	73152200	73152400	bin6336584	H3K27ac_true
chr9	73152400	73152600	bin6336585	H3K27ac_true
chr9	73152600	73152800	bin6336586	H3K27ac_true
chr9	74953600	74953800	bin6343866	H3K27ac_true
chr9	89311600	89311800	bin6398889	H3K27ac_true
chr9	89311800	89312000	bin6398890	H3K27ac_true
chr9	89312000	89312200	bin6398891	H3K27ac_true
chr9	89319200	89319400	bin6398926	H3K27ac_true
chr9	91949600	91949800	bin6409774	H3K27ac_true
chr9	91949800	91950000	bin6409775	H3K27ac_true
chr9	91950000	91950200	bin6409776	H3K27ac_true
chr9	91950200	91950400	bin6409777	H3K27ac_true
chr9	91950400	91950600	bin6409778	H3K27ac_true
chr9	93577200	93577400	bin6415424	H3K27ac_true
chr9	98118600	98118800	bin6430750	H3K27ac_true
chr9	98808000	98808200	bin6433679	H3K27ac_true
chr9	112380600	112380800	bin6487771	H3K27ac_true
chr9	113220200	113220400	bin6490951	H3K27ac_true
chr9	113220400	113220600	bin6490952	H3K27ac_true
chr9	127905000	127905200	bin6552760	H3K27ac_true
chr9	127905200	127905400	bin6552761	H3K27ac_true
chr9	128946600	128946800	bin6556227	H3K27ac_true
chr9	129027400	129027600	bin6556508	H3K27ac_true
chr9	136397600	136397800	bin6586601	H3K27ac_true
chr9	136397800	136398000	bin6586602	H3K27ac_true
chr9	136398000	136398200	bin6586603	H3K27ac_true
chr9	136398200	136398400	bin6586604	H3K27ac_true
chr9	136885800	136886000	bin6588585	H3K27ac_true
chr9	136886000	136886200	bin6588586	H3K27ac_true
chr9	136886200	136886400	bin6588587	H3K27ac_true
chr9	137085800	137086000	bin6589420	H3K27ac_true
chr9	137113600	137113800	bin6589530	H3K27ac_true
chr9	137206400	137206600	bin6589897	H3K27ac_true
chr9	137206600	137206800	bin6589898	H3K27ac_true
chr9	137301200	137301400	bin6590278	H3K27ac_true
chr9	137301400	137301600	bin6590279	H3K27ac_true
chr11	235800	236000	bin6593473	H3K27ac_true
chr11	236000	236200	bin6593474	H3K27ac_true
chr11	236200	236400	bin6593475	H3K27ac_true
chr11	236400	236600	bin6593476	H3K27ac_true
chr11	288000	288200	bin6593688	H3K27ac_true
chr11	288200	288400	bin6593689	H3K27ac_true
chr11	288400	288600	bin6593690	H3K27ac_true
chr11	288600	288800	bin6593691	H3K27ac_true
chr11	288800	289000	bin6593692	H3K27ac_true
chr11	289000	289200	bin6593693	H3K27ac_true
chr11	289200	289400	bin6593694	H3K27ac_true
chr11	289400	289600	bin6593695	H3K27ac_true
chr11	842800	843000	bin6595728	H3K27ac_true
chr11	843000	843200	bin6595729	H3K27ac_true
chr11	5235200	5235400	bin6611431	H3K27ac_true
chr11	5235400	5235600	bin6611432	H3K27ac_true
chr11	5302000	5302200	bin6611678	H3K27ac_true
chr11	5302200	5302400	bin6611679	H3K27ac_true
chr11	5505000	5505200	bin6612470	H3K27ac_true
chr11	5505200	5505400	bin6612471	H3K27ac_true
chr11	18321600	18321800	bin6663472	H3K27ac_true
chr11	33160400	33160600	bin6722141	H3K27ac_true
chr11	33160600	33160800	bin6722142	H3K27ac_true
chr11	33160800	33161000	bin6722143	H3K27ac_true
chr11	33735800	33736000	bin6724445	H3K27ac_true
chr11	33892600	33892800	bin6725103	H3K27ac_true
chr11	46277400	46277600	bin6775258	H3K27ac_true
chr11	46616200	46616400	bin6776609	H3K27ac_true
chr11	46616400	46616600	bin6776610	H3K27ac_true
chr11	46616600	46616800	bin6776611	H3K27ac_true
chr11	46616800	46617000	bin6776612	H3K27ac_true
chr11	46845600	46845800	bin6777473	H3K27ac_true
chr11	46845800	46846000	bin6777474	H3K27ac_true
chr11	46846000	46846200	bin6777475	H3K27ac_true
chr11	47248800	47249000	bin6778926	H3K27ac_true
chr11	57335200	57335400	bin6789248	H3K27ac_true
chr11	57762000	57762200	bin6790912	H3K27ac_true
chr11	57762200	57762400	bin6790913	H3K27ac_true
chr11	57762400	57762600	bin6790914	H3K27ac_true
chr11	61792000	61792200	bin6804210	H3K27ac_true
chr11	61792200	61792400	bin6804211	H3K27ac_true
chr11	62621000	62621200	bin6806917	H3K27ac_true
chr11	62621200	62621400	bin6806918	H3K27ac_true
chr11	62679000	62679200	bin6807120	H3K27ac_true
chr11	62853000	62853200	bin6807697	H3K27ac_true
chr11	62853200	62853400	bin6807698	H3K27ac_true
chr11	62853400	62853600	bin6807699	H3K27ac_true
chr11	64230400	64230600	bin6812029	H3K27ac_true
chr11	65097000	65097200	bin6815642	H3K27ac_true
chr11	65117200	65117400	bin6815726	H3K27ac_true
chr11	65118400	65118600	bin6815731	H3K27ac_true
chr11	65118600	65118800	bin6815732	H3K27ac_true
chr11	66051200	66051400	bin6819153	H3K27ac_true
chr11	67119800	67120000	bin6823110	H3K27ac_true
chr11	67120000	67120200	bin6823111	H3K27ac_true
chr11	67120200	67120400	bin6823112	H3K27ac_true
chr11	72113400	72113600	bin6839896	H3K27ac_true
chr11	72113600	72113800	bin6839897	H3K27ac_true
chr11	72224600	72224800	bin6840112	H3K27ac_true
chr11	72753200	72753400	bin6842348	H3K27ac_true
chr11	78080400	78080600	bin6862750	H3K27ac_true
chr11	82902600	82902800	bin6881901	H3K27ac_true
chr11	90222400	90222600	bin6906060	H3K27ac_true
chr11	90223800	90224000	bin6906067	H3K27ac_true
chr11	93732000	93732200	bin6920023	H3K27ac_true
chr11	93732200	93732400	bin6920024	H3K27ac_true
chr11	102346000	102346200	bin6953015	H3K27ac_true
chr11	108497400	108497600	bin6976978	H3K27ac_true
chr11	108497600	108497800	bin6976979	H3K27ac_true
chr11	108497800	108498000	bin6976980	H3K27ac_true
chr11	108498000	108498200	bin6976981	H3K27ac_true
chr11	108498200	108498400	bin6976982	H3K27ac_true
chr11	108498400	108498600	bin6976983	H3K27ac_true
chr11	108498600	108498800	bin6976984	H3K27ac_true
chr11	111879600	111879800	bin6990398	H3K27ac_true
chr11	111879800	111880000	bin6990399	H3K27ac_true
chr11	111880000	111880200	bin6990400	H3K27ac_true
chr11	112023800	112024000	bin6990896	H3K27ac_true
chr11	112024000	112024200	bin6990897	H3K27ac_true
chr11	126268000	126268200	bin7049685	H3K27ac_true
chr10	5412000	5412200	bin7109163	H3K27ac_true
chr10	5412200	5412400	bin7109164	H3K27ac_true
chr10	5412400	5412600	bin7109165	H3K27ac_true
chr10	5685800	5686000	bin7110377	H3K27ac_true
chr10	11611000	11611200	bin7135793	H3K27ac_true
chr10	22713400	22713600	bin7179002	H3K27ac_true
chr10	32377800	32378000	bin7214219	H3K27ac_true
chr10	49187400	49187600	bin7250286	H3K27ac_true
chr10	49187600	49187800	bin7250287	H3K27ac_true
chr10	59907200	59907400	bin7290306	H3K27ac_true
chr10	59907400	59907600	bin7290307	H3K27ac_true
chr10	59907600	59907800	bin7290308	H3K27ac_true
chr10	63465800	63466000	bin7305322	H3K27ac_true
chr10	63466000	63466200	bin7305323	H3K27ac_true
chr10	69088800	69089000	bin7326237	H3K27ac_true
chr10	69089000	69089200	bin7326238	H3K27ac_true
chr10	78029800	78030000	bin7361942	H3K27ac_true
chr10	78030000	78030200	bin7361943	H3K27ac_true
chr10	87503400	87503600	bin7396093	H3K27ac_true
chr10	87503600	87503800	bin7396094	H3K27ac_true
chr10	87503800	87504000	bin7396095	H3K27ac_true
chr10	87817200	87817400	bin7397273	H3K27ac_true
chr10	91923600	91923800	bin7413483	H3K27ac_true
chr10	91923800	91924000	bin7413484	H3K27ac_true
chr10	92574600	92574800	bin7415806	H3K27ac_true
chr10	92593400	92593600	bin7415860	H3K27ac_true
chr10	92593600	92593800	bin7415861	H3K27ac_true
chr10	92593800	92594000	bin7415862	H3K27ac_true
chr10	92688800	92689000	bin7416160	H3K27ac_true
chr10	92689000	92689200	bin7416161	H3K27ac_true
chr10	92689200	92689400	bin7416162	H3K27ac_true
chr10	92833800	92834000	bin7416722	H3K27ac_true
chr10	92834000	92834200	bin7416723	H3K27ac_true
chr10	92834200	92834400	bin7416724	H3K27ac_true
chr10	92834400	92834600	bin7416725	H3K27ac_true
chr10	96587600	96587800	bin7430453	H3K27ac_true
chr10	97293200	97293400	bin7433253	H3K27ac_true
chr10	97293400	97293600	bin7433254	H3K27ac_true
chr10	97293600	97293800	bin7433255	H3K27ac_true
chr10	101695200	101695400	bin7450368	H3K27ac_true
chr10	101695400	101695600	bin7450369	H3K27ac_true
chr10	101695600	101695800	bin7450370	H3K27ac_true
chr10	102450800	102451000	bin7453125	H3K27ac_true
chr10	102643400	102643600	bin7453855	H3K27ac_true
chr10	102643600	102643800	bin7453856	H3K27ac_true
chr10	102643800	102644000	bin7453857	H3K27ac_true
chr10	102644000	102644200	bin7453858	H3K27ac_true
chr10	110005800	110006000	bin7483522	H3K27ac_true
chr10	110006000	110006200	bin7483523	H3K27ac_true
chr10	110006200	110006400	bin7483524	H3K27ac_true
chr10	110006400	110006600	bin7483525	H3K27ac_true
chr10	110006600	110006800	bin7483526	H3K27ac_true
chr10	119543200	119543400	bin7523963	H3K27ac_true
chr10	119543400	119543600	bin7523964	H3K27ac_true
chr12	1595000	1595200	bin7589628	H3K27ac_true
chr12	1690000	1690200	bin7590017	H3K27ac_true
chr12	6342600	6342800	bin7609566	H3K27ac_true
chr12	6342800	6343000	bin7609567	H3K27ac_true
chr12	6343000	6343200	bin7609568	H3K27ac_true
chr12	6663600	6663800	bin7610713	H3K27ac_true
chr12	6690200	6690400	bin7610828	H3K27ac_true
chr12	6690400	6690600	bin7610829	H3K27ac_true
chr12	6828400	6828600	bin7611332	H3K27ac_true
chr12	6914800	6915000	bin7611657	H3K27ac_true
chr12	6942400	6942600	bin7611779	H3K27ac_true
chr12	6942600	6942800	bin7611780	H3K27ac_true
chr12	6942800	6943000	bin7611781	H3K27ac_true
chr12	21500800	21501000	bin7662958	H3K27ac_true
chr12	45214800	45215000	bin7737376	H3K27ac_true
chr12	48717600	48717800	bin7750287	H3K27ac_true
chr12	48717800	48718000	bin7750288	H3K27ac_true
chr12	49111400	49111600	bin7751765	H3K27ac_true
chr12	49365800	49366000	bin7752528	H3K27ac_true
chr12	50167200	50167400	bin7755628	H3K27ac_true
chr12	50167400	50167600	bin7755629	H3K27ac_true
chr12	50283600	50283800	bin7756047	H3K27ac_true
chr12	50283800	50284000	bin7756048	H3K27ac_true
chr12	50284000	50284200	bin7756049	H3K27ac_true
chr12	50284200	50284400	bin7756050	H3K27ac_true
chr12	50284400	50284600	bin7756051	H3K27ac_true
chr12	50764800	50765000	bin7757673	H3K27ac_true
chr12	50765000	50765200	bin7757674	H3K27ac_true
chr12	50923600	50923800	bin7758075	H3K27ac_true
chr12	50923800	50924000	bin7758076	H3K27ac_true
chr12	50924200	50924400	bin7758077	H3K27ac_true
chr12	50924400	50924600	bin7758078	H3K27ac_true
chr12	50924600	50924800	bin7758079	H3K27ac_true
chr12	51028000	51028200	bin7758428	H3K27ac_true
chr12	51049200	51049400	bin7758495	H3K27ac_true
chr12	51239400	51239600	bin7759156	H3K27ac_true
chr12	54281600	54281800	bin7771077	H3K27ac_true
chr12	54300000	54300200	bin7771144	H3K27ac_true
chr12	55828600	55828800	bin7776582	H3K27ac_true
chr12	55828800	55829000	bin7776583	H3K27ac_true
chr12	55829000	55829200	bin7776584	H3K27ac_true
chr12	55972800	55973000	bin7777041	H3K27ac_true
chr12	56117000	56117200	bin7777526	H3K27ac_true
chr12	56117200	56117400	bin7777527	H3K27ac_true
chr12	56151800	56152000	bin7777666	H3K27ac_true
chr12	56224000	56224200	bin7777936	H3K27ac_true
chr12	56224200	56224400	bin7777937	H3K27ac_true
chr12	56224400	56224600	bin7777938	H3K27ac_true
chr12	56338000	56338200	bin7778347	H3K27ac_true
chr12	56359600	56359800	bin7778430	H3K27ac_true
chr12	56359800	56360000	bin7778431	H3K27ac_true
chr12	56360000	56360200	bin7778432	H3K27ac_true
chr12	56360200	56360400	bin7778433	H3K27ac_true
chr12	56360400	56360600	bin7778434	H3K27ac_true
chr12	57311000	57311200	bin7781567	H3K27ac_true
chr12	57311200	57311400	bin7781568	H3K27ac_true
chr12	57518800	57519000	bin7782234	H3K27ac_true
chr12	57519000	57519200	bin7782235	H3K27ac_true
chr12	57519200	57519400	bin7782236	H3K27ac_true
chr12	57519400	57519600	bin7782237	H3K27ac_true
chr12	57519600	57519800	bin7782238	H3K27ac_true
chr12	57548200	57548400	bin7782374	H3K27ac_true
chr12	57936200	57936400	bin7783847	H3K27ac_true
chr12	57936400	57936600	bin7783848	H3K27ac_true
chr12	57936600	57936800	bin7783849	H3K27ac_true
chr12	64451000	64451200	bin7807817	H3K27ac_true
chr12	76560600	76560800	bin7855809	H3K27ac_true
chr12	76560800	76561000	bin7855810	H3K27ac_true
chr12	76763200	76763400	bin7856543	H3K27ac_true
chr12	93676400	93676600	bin7924567	H3K27ac_true
chr12	93676600	93676800	bin7924568	H3K27ac_true
chr12	108560400	108560600	bin7983956	H3K27ac_true
chr12	110000000	110000200	bin7989723	H3K27ac_true
chr12	112107800	112108000	bin7997043	H3K27ac_true
chr12	112108000	112108200	bin7997044	H3K27ac_true
chr12	112108200	112108400	bin7997045	H3K27ac_true
chr12	112108400	112108600	bin7997046	H3K27ac_true
chr12	112108600	112108800	bin7997047	H3K27ac_true
chr12	112408600	112408800	bin7998121	H3K27ac_true
chr12	112418800	112419000	bin7998152	H3K27ac_true
chr12	116277000	116277200	bin8014509	H3K27ac_true
chr12	116277200	116277400	bin8014510	H3K27ac_true
chr12	116277400	116277600	bin8014511	H3K27ac_true
chr12	121399000	121399200	bin8034187	H3K27ac_true
chr12	121399200	121399400	bin8034188	H3K27ac_true
chr12	121804200	121804400	bin8035539	H3K27ac_true
chr12	121804400	121804600	bin8035540	H3K27ac_true
chr12	121804600	121804800	bin8035541	H3K27ac_true
chr12	122422800	122423000	bin8037730	H3K27ac_true
chr12	122423000	122423200	bin8037731	H3K27ac_true
chr12	122423200	122423400	bin8037732	H3K27ac_true
chr12	123232200	123232400	bin8040561	H3K27ac_true
chr12	123436000	123436200	bin8041170	H3K27ac_true
chr12	123458000	123458200	bin8041206	H3K27ac_true
chr12	123458200	123458400	bin8041207	H3K27ac_true
chr12	123533000	123533200	bin8041451	H3K27ac_true
chr12	124992600	124992800	bin8047434	H3K27ac_true
chr12	124992800	124993000	bin8047435	H3K27ac_true
chr13	19634200	19634400	bin8081198	H3K27ac_true
chr13	19634400	19634600	bin8081199	H3K27ac_true
chr13	24923400	24923600	bin8099700	H3K27ac_true
chr13	33818800	33819000	bin8135475	H3K27ac_true
chr13	33819000	33819200	bin8135476	H3K27ac_true
chr13	38348600	38348800	bin8153595	H3K27ac_true
chr13	41018200	41018400	bin8163923	H3K27ac_true
chr13	41018400	41018600	bin8163924	H3K27ac_true
chr13	41018600	41018800	bin8163925	H3K27ac_true
chr13	41018800	41019000	bin8163926	H3K27ac_true
chr13	41019000	41019200	bin8163927	H3K27ac_true
chr13	41019200	41019400	bin8163928	H3K27ac_true
chr13	41019400	41019600	bin8163929	H3K27ac_true
chr13	41019600	41019800	bin8163930	H3K27ac_true
chr13	41019800	41020000	bin8163931	H3K27ac_true
chr13	41020000	41020200	bin8163932	H3K27ac_true
chr13	41960000	41960200	bin8167248	H3K27ac_true
chr13	41960200	41960400	bin8167249	H3K27ac_true
chr13	41960400	41960600	bin8167250	H3K27ac_true
chr13	41961800	41962000	bin8167257	H3K27ac_true
chr13	46798000	46798200	bin8187135	H3K27ac_true
chr13	49691400	49691600	bin8197975	H3K27ac_true
chr13	49691600	49691800	bin8197976	H3K27ac_true
chr13	95676000	95676200	bin8381881	H3K27ac_true
chr13	95676200	95676400	bin8381882	H3K27ac_true
chr13	99199600	99199800	bin8396133	H3K27ac_true
chr13	99199800	99200000	bin8396134	H3K27ac_true
chr13	99200000	99200200	bin8396135	H3K27ac_true
chr13	99200200	99200400	bin8396136	H3K27ac_true
chr13	99200400	99200600	bin8396137	H3K27ac_true
chr13	99200600	99200800	bin8396138	H3K27ac_true
chr13	102597800	102598000	bin8410127	H3K27ac_true
chr13	110705200	110705400	bin8445294	H3K27ac_true
chr13	110705400	110705600	bin8445295	H3K27ac_true
chr13	113207000	113207200	bin8454924	H3K27ac_true
chr13	113297200	113297400	bin8455293	H3K27ac_true
chr13	113489600	113489800	bin8456012	H3K27ac_true
chr13	113489800	113490000	bin8456013	H3K27ac_true
chr13	113585600	113585800	bin8456404	H3K27ac_true
chr14	20332600	20332800	bin8460654	H3K27ac_true
chr14	20462200	20462400	bin8461213	H3K27ac_true
chr14	20462400	20462600	bin8461214	H3K27ac_true
chr14	20802800	20803000	bin8462404	H3K27ac_true
chr14	20803000	20803200	bin8462405	H3K27ac_true
chr14	20803200	20803400	bin8462406	H3K27ac_true
chr14	20803400	20803600	bin8462407	H3K27ac_true
chr14	20803600	20803800	bin8462408	H3K27ac_true
chr14	22766600	22766800	bin8469337	H3K27ac_true
chr14	22918000	22918200	bin8469905	H3K27ac_true
chr14	23009400	23009600	bin8470238	H3K27ac_true
chr14	23009600	23009800	bin8470239	H3K27ac_true
chr14	23009800	23010000	bin8470240	H3K27ac_true
chr14	23010000	23010200	bin8470241	H3K27ac_true
chr14	23010200	23010400	bin8470242	H3K27ac_true
chr14	24195600	24195800	bin8474289	H3K27ac_true
chr14	30873400	30873600	bin8500526	H3K27ac_true
chr14	31206400	31206600	bin8501778	H3K27ac_true
chr14	31206600	31206800	bin8501779	H3K27ac_true
chr14	31206800	31207000	bin8501780	H3K27ac_true
chr14	31207000	31207200	bin8501781	H3K27ac_true
chr14	31207200	31207400	bin8501782	H3K27ac_true
chr14	35044800	35045000	bin8516426	H3K27ac_true
chr14	35045000	35045200	bin8516427	H3K27ac_true
chr14	35045200	35045400	bin8516428	H3K27ac_true
chr14	35045400	35045600	bin8516429	H3K27ac_true
chr14	35045600	35045800	bin8516430	H3K27ac_true
chr14	35123200	35123400	bin8516687	H3K27ac_true
chr14	35123400	35123600	bin8516688	H3K27ac_true
chr14	37173400	37173600	bin8524856	H3K27ac_true
chr14	37173600	37173800	bin8524857	H3K27ac_true
chr14	39113800	39114000	bin8531760	H3K27ac_true
chr14	39114000	39114200	bin8531761	H3K27ac_true
chr14	39114200	39114400	bin8531762	H3K27ac_true
chr14	39114400	39114600	bin8531763	H3K27ac_true
chr14	39175600	39175800	bin8531961	H3K27ac_true
chr14	39264600	39264800	bin8532228	H3K27ac_true
chr14	39264800	39265000	bin8532229	H3K27ac_true
chr14	39265000	39265200	bin8532230	H3K27ac_true
chr14	39265200	39265400	bin8532231	H3K27ac_true
chr14	45083600	45083800	bin8553551	H3K27ac_true
chr14	45083800	45084000	bin8553552	H3K27ac_true
chr14	45084000	45084200	bin8553553	H3K27ac_true
chr14	49598400	49598600	bin8570437	H3K27ac_true
chr14	49598600	49598800	bin8570438	H3K27ac_true
chr14	49598800	49599000	bin8570439	H3K27ac_true
chr14	49599000	49599200	bin8570440	H3K27ac_true
chr14	50531600	50531800	bin8573904	H3K27ac_true
chr14	58200800	58201000	bin8603911	H3K27ac_true
chr14	58297400	58297600	bin8604286	H3K27ac_true
chr14	58299200	58299400	bin8604295	H3K27ac_true
chr14	58299400	58299600	bin8604296	H3K27ac_true
chr14	64389000	64389200	bin8627919	H3K27ac_true
chr14	64505400	64505600	bin8628384	H3K27ac_true
chr14	67694800	67695000	bin8640578	H3K27ac_true
chr14	74019400	74019600	bin8665005	H3K27ac_true
chr14	74019600	74019800	bin8665006	H3K27ac_true
chr14	75068400	75068600	bin8669191	H3K27ac_true
chr14	75068600	75068800	bin8669192	H3K27ac_true
chr14	75068800	75069000	bin8669193	H3K27ac_true
chr14	75127200	75127400	bin8669439	H3K27ac_true
chr14	75127400	75127600	bin8669440	H3K27ac_true
chr14	77456800	77457000	bin8679135	H3K27ac_true
chr14	77760600	77760800	bin8680243	H3K27ac_true
chr14	77760800	77761000	bin8680244	H3K27ac_true
chr14	77761000	77761200	bin8680245	H3K27ac_true
chr14	77761200	77761400	bin8680246	H3K27ac_true
chr14	77761400	77761600	bin8680247	H3K27ac_true
chr14	77761600	77761800	bin8680248	H3K27ac_true
chr14	77761800	77762000	bin8680249	H3K27ac_true
chr14	81427000	81427200	bin8695848	H3K27ac_true
chr14	81427200	81427400	bin8695849	H3K27ac_true
chr14	81427400	81427600	bin8695850	H3K27ac_true
chr14	81427600	81427800	bin8695851	H3K27ac_true
chr14	81427800	81428000	bin8695852	H3K27ac_true
chr14	91115000	91115200	bin8735586	H3K27ac_true
chr14	91511200	91511400	bin8737094	H3K27ac_true
chr14	100065800	100066000	bin8773266	H3K27ac_true
chr14	100066000	100066200	bin8773267	H3K27ac_true
chr14	100066200	100066400	bin8773268	H3K27ac_true
chr14	100066400	100066600	bin8773269	H3K27ac_true
chr14	101964600	101964800	bin8781219	H3K27ac_true
chr14	101964800	101965000	bin8781220	H3K27ac_true
chr14	102138800	102139000	bin8781832	H3K27ac_true
chr14	102139000	102139200	bin8781833	H3K27ac_true
chr14	102140400	102140600	bin8781840	H3K27ac_true
chr14	102140600	102140800	bin8781841	H3K27ac_true
chr14	102140800	102141000	bin8781842	H3K27ac_true
chr14	102591600	102591800	bin8783386	H3K27ac_true
chr14	102591800	102592000	bin8783387	H3K27ac_true
chr14	102777400	102777600	bin8784060	H3K27ac_true
chr14	102777600	102777800	bin8784061	H3K27ac_true
chr14	102777800	102778000	bin8784062	H3K27ac_true
chr14	103126800	103127000	bin8785443	H3K27ac_true
chr14	103333200	103333400	bin8786097	H3K27ac_true
chr14	103385800	103386000	bin8786264	H3K27ac_true
chr14	103386000	103386200	bin8786265	H3K27ac_true
chr14	104795200	104795400	bin8791837	H3K27ac_true
chr14	105167800	105168000	bin8793244	H3K27ac_true
chr14	105168000	105168200	bin8793245	H3K27ac_true
chr15	22839400	22839600	bin8796382	H3K27ac_true
chr15	22839600	22839800	bin8796383	H3K27ac_true
chr15	34437600	34437800	bin8830700	H3K27ac_true
chr15	34437800	34438000	bin8830701	H3K27ac_true
chr15	40564000	40564200	bin8855345	H3K27ac_true
chr15	40564200	40564400	bin8855346	H3K27ac_true
chr15	41333600	41333800	bin8857851	H3K27ac_true
chr15	42494800	42495000	bin8862332	H3K27ac_true
chr15	42495000	42495200	bin8862333	H3K27ac_true
chr15	42737800	42738000	bin8863199	H3K27ac_true
chr15	43106600	43106800	bin8864457	H3K27ac_true
chr15	43106800	43107000	bin8864458	H3K27ac_true
chr15	50355400	50355600	bin8890522	H3K27ac_true
chr15	50355600	50355800	bin8890523	H3K27ac_true
chr15	50355800	50356000	bin8890524	H3K27ac_true
chr15	50356000	50356200	bin8890525	H3K27ac_true
chr15	50356200	50356400	bin8890526	H3K27ac_true
chr15	50356400	50356600	bin8890527	H3K27ac_true
chr15	50687400	50687600	bin8891652	H3K27ac_true
chr15	65791200	65791400	bin8951532	H3K27ac_true
chr15	65868800	65869000	bin8951776	H3K27ac_true
chr15	67541800	67542000	bin8958722	H3K27ac_true
chr15	72232400	72232600	bin8978458	H3K27ac_true
chr15	72232600	72232800	bin8978459	H3K27ac_true
chr15	74907800	74908000	bin8988872	H3K27ac_true
chr15	82749400	82749600	bin9016366	H3K27ac_true
chr15	82749600	82749800	bin9016367	H3K27ac_true
chr15	90528800	90529000	bin9044754	H3K27ac_true
chr15	90995400	90995600	bin9046597	H3K27ac_true
chr15	90995600	90995800	bin9046598	H3K27ac_true
chr15	96325400	96325600	bin9069025	H3K27ac_true
chr16	138000	138200	bin9091654	H3K27ac_true
chr16	138200	138400	bin9091655	H3K27ac_true
chr16	235200	235400	bin9091916	H3K27ac_true
chr16	369400	369600	bin9092427	H3K27ac_true
chr16	369600	369800	bin9092428	H3K27ac_true
chr16	380800	381000	bin9092480	H3K27ac_true
chr16	588800	589000	bin9093247	H3K27ac_true
chr16	1963600	1963800	bin9098885	H3K27ac_true
chr16	1963800	1964000	bin9098886	H3K27ac_true
chr16	1964000	1964200	bin9098887	H3K27ac_true
chr16	1964200	1964400	bin9098888	H3K27ac_true
chr16	1973000	1973200	bin9098921	H3K27ac_true
chr16	1988800	1989000	bin9098998	H3K27ac_true
chr16	1989000	1989200	bin9098999	H3K27ac_true
chr16	2009400	2009600	bin9099092	H3K27ac_true
chr16	2154200	2154400	bin9099540	H3K27ac_true
chr16	2514400	2514600	bin9100934	H3K27ac_true
chr16	2520200	2520400	bin9100959	H3K27ac_true
chr16	2520400	2520600	bin9100960	H3K27ac_true
chr16	2520600	2520800	bin9100961	H3K27ac_true
chr16	4848400	4848600	bin9109023	H3K27ac_true
chr16	4848600	4848800	bin9109024	H3K27ac_true
chr16	20899600	20899800	bin9163117	H3K27ac_true
chr16	23511400	23511600	bin9170832	H3K27ac_true
chr16	23558200	23558400	bin9170985	H3K27ac_true
chr16	23558400	23558600	bin9170986	H3K27ac_true
chr16	25014200	25014400	bin9176640	H3K27ac_true
chr16	30609800	30610000	bin9193475	H3K27ac_true
chr16	30762000	30762200	bin9193974	H3K27ac_true
chr16	30762200	30762400	bin9193975	H3K27ac_true
chr16	30922000	30922200	bin9194475	H3K27ac_true
chr16	30922200	30922400	bin9194476	H3K27ac_true
chr16	30949200	30949400	bin9194584	H3K27ac_true
chr16	31457200	31457400	bin9196270	H3K27ac_true
chr16	31457400	31457600	bin9196271	H3K27ac_true
chr16	56450200	56450400	bin9239259	H3K27ac_true
chr16	67030000	67030200	bin9282392	H3K27ac_true
chr16	67841200	67841400	bin9285518	H3K27ac_true
chr16	67892400	67892600	bin9285713	H3K27ac_true
chr16	67892600	67892800	bin9285714	H3K27ac_true
chr16	67892800	67893000	bin9285715	H3K27ac_true
chr16	70523000	70523200	bin9294055	H3K27ac_true
chr16	70523200	70523400	bin9294056	H3K27ac_true
chr16	89562400	89562600	bin9370564	H3K27ac_true
chr16	89711200	89711400	bin9371109	H3K27ac_true
chr16	89711400	89711600	bin9371110	H3K27ac_true
chr16	89973400	89973600	bin9372020	H3K27ac_true
chr16	89973600	89973800	bin9372021	H3K27ac_true
chr16	89973800	89974000	bin9372022	H3K27ac_true
chr16	90018800	90019000	bin9372204	H3K27ac_true
chr17	1517800	1518000	bin9377122	H3K27ac_true
chr17	1562000	1562200	bin9377294	H3K27ac_true
chr17	1562200	1562400	bin9377295	H3K27ac_true
chr17	1562400	1562600	bin9377296	H3K27ac_true
chr17	1562600	1562800	bin9377297	H3K27ac_true
chr17	1562800	1563000	bin9377298	H3K27ac_true
chr17	1563000	1563200	bin9377299	H3K27ac_true
chr17	2304600	2304800	bin9380087	H3K27ac_true
chr17	4948400	4948600	bin9389432	H3K27ac_true
chr17	4948600	4948800	bin9389433	H3K27ac_true
chr17	4998800	4999000	bin9389634	H3K27ac_true
chr17	5438000	5438200	bin9390966	H3K27ac_true
chr17	5468200	5468400	bin9391087	H3K27ac_true
chr17	7241400	7241600	bin9398123	H3K27ac_true
chr17	7241600	7241800	bin9398124	H3K27ac_true
chr17	7241800	7242000	bin9398125	H3K27ac_true
chr17	7242000	7242200	bin9398126	H3K27ac_true
chr17	7242200	7242400	bin9398127	H3K27ac_true
chr17	7242400	7242600	bin9398128	H3K27ac_true
chr17	7577000	7577200	bin9399356	H3K27ac_true
chr17	7883800	7884000	bin9400537	H3K27ac_true
chr17	7884000	7884200	bin9400538	H3K27ac_true
chr17	7884200	7884400	bin9400539	H3K27ac_true
chr17	8211200	8211400	bin9401850	H3K27ac_true
chr17	16214400	16214600	bin9433376	H3K27ac_true
chr17	16214600	16214800	bin9433377	H3K27ac_true
chr17	18038000	18038200	bin9439249	H3K27ac_true
chr17	18038200	18038400	bin9439250	H3K27ac_true
chr17	18038400	18038600	bin9439251	H3K27ac_true
chr17	21213600	21213800	bin9446094	H3K27ac_true
chr17	28042200	28042400	bin9449771	H3K27ac_true
chr17	28042400	28042600	bin9449772	H3K27ac_true
chr17	28042600	28042800	bin9449773	H3K27ac_true
chr17	28042800	28043000	bin9449774	H3K27ac_true
chr17	28598000	28598200	bin9451757	H3K27ac_true
chr17	28598200	28598400	bin9451758	H3K27ac_true
chr17	28663200	28663400	bin9451998	H3K27ac_true
chr17	28897000	28897200	bin9452812	H3K27ac_true
chr17	28897200	28897400	bin9452813	H3K27ac_true
chr17	30116200	30116400	bin9457322	H3K27ac_true
chr17	30116400	30116600	bin9457323	H3K27ac_true
chr17	31900600	31900800	bin9462573	H3K27ac_true
chr17	32877800	32878000	bin9465671	H3K27ac_true
chr17	32878000	32878200	bin9465672	H3K27ac_true
chr17	39928200	39928400	bin9489951	H3K27ac_true
chr17	40123200	40123400	bin9490693	H3K27ac_true
chr17	40141200	40141400	bin9490768	H3K27ac_true
chr17	40417000	40417200	bin9491738	H3K27ac_true
chr17	40417200	40417400	bin9491739	H3K27ac_true
chr17	40819000	40819200	bin9493405	H3K27ac_true
chr17	42120600	42120800	bin9498071	H3K27ac_true
chr17	42387400	42387600	bin9499080	H3K27ac_true
chr17	42387600	42387800	bin9499081	H3K27ac_true
chr17	42832200	42832400	bin9500580	H3K27ac_true
chr17	43484800	43485000	bin9502277	H3K27ac_true
chr17	44707800	44708000	bin9506568	H3K27ac_true
chr17	48944200	48944400	bin9519752	H3K27ac_true
chr17	48944400	48944600	bin9519753	H3K27ac_true
chr17	48944600	48944800	bin9519754	H3K27ac_true
chr17	48944800	48945000	bin9519755	H3K27ac_true
chr17	48945000	48945200	bin9519756	H3K27ac_true
chr17	48945200	48945400	bin9519757	H3K27ac_true
chr17	51121600	51121800	bin9528373	H3K27ac_true
chr17	51121800	51122000	bin9528374	H3K27ac_true
chr17	57257000	57257200	bin9552388	H3K27ac_true
chr17	57257200	57257400	bin9552389	H3K27ac_true
chr17	59618600	59618800	bin9561606	H3K27ac_true
chr17	63446800	63447000	bin9574241	H3K27ac_true
chr17	63623000	63623200	bin9574959	H3K27ac_true
chr17	63623200	63623400	bin9574960	H3K27ac_true
chr17	63623400	63623600	bin9574961	H3K27ac_true
chr17	63741000	63741200	bin9575434	H3K27ac_true
chr17	63741200	63741400	bin9575435	H3K27ac_true
chr17	73231400	73231600	bin9611355	H3K27ac_true
chr17	73231600	73231800	bin9611356	H3K27ac_true
chr17	75182000	75182200	bin9619487	H3K27ac_true
chr17	75184000	75184200	bin9619497	H3K27ac_true
chr17	75779800	75780000	bin9621685	H3K27ac_true
chr17	75780000	75780200	bin9621686	H3K27ac_true
chr17	76071400	76071600	bin9622724	H3K27ac_true
chr17	76071600	76071800	bin9622725	H3K27ac_true
chr17	76071800	76072000	bin9622726	H3K27ac_true
chr17	76452200	76452400	bin9624141	H3K27ac_true
chr17	76452400	76452600	bin9624142	H3K27ac_true
chr17	81294600	81294800	bin9644009	H3K27ac_true
chr17	81712000	81712200	bin9645700	H3K27ac_true
chr17	81712200	81712400	bin9645701	H3K27ac_true
chr17	81891600	81891800	bin9646177	H3K27ac_true
chr17	81917200	81917400	bin9646285	H3K27ac_true
chr17	81978400	81978600	bin9646527	H3K27ac_true
chr17	82450200	82450400	bin9648430	H3K27ac_true
chr17	82450400	82450600	bin9648431	H3K27ac_true
chr17	82450600	82450800	bin9648432	H3K27ac_true
chr17	82450800	82451000	bin9648433	H3K27ac_true
chr17	82457000	82457200	bin9648443	H3K27ac_true
chr17	82457200	82457400	bin9648444	H3K27ac_true
chr17	82457400	82457600	bin9648445	H3K27ac_true
chr17	82457600	82457800	bin9648446	H3K27ac_true
chr17	82519000	82519200	bin9648652	H3K27ac_true
chr17	82519200	82519400	bin9648653	H3K27ac_true
chr17	82519400	82519600	bin9648654	H3K27ac_true
chr17	82519600	82519800	bin9648655	H3K27ac_true
chr17	82519800	82520000	bin9648656	H3K27ac_true
chr18	3012400	3012600	bin9662574	H3K27ac_true
chr18	9101600	9101800	bin9686952	H3K27ac_true
chr18	9101800	9102000	bin9686953	H3K27ac_true
chr18	9707400	9707600	bin9689190	H3K27ac_true
chr18	9912800	9913000	bin9690028	H3K27ac_true
chr18	11850600	11850800	bin9697660	H3K27ac_true
chr18	11850800	11851000	bin9697661	H3K27ac_true
chr18	11851000	11851200	bin9697662	H3K27ac_true
chr18	11851200	11851400	bin9697663	H3K27ac_true
chr18	12657000	12657200	bin9700129	H3K27ac_true
chr18	12948800	12949000	bin9701176	H3K27ac_true
chr18	12992200	12992400	bin9701335	H3K27ac_true
chr18	21741800	21742000	bin9708651	H3K27ac_true
chr18	49486200	49486400	bin9823879	H3K27ac_true
chr18	50288400	50288600	bin9827149	H3K27ac_true
chr20	289600	289800	bin9953995	H3K27ac_true
chr20	289800	290000	bin9953996	H3K27ac_true
chr20	290000	290200	bin9953997	H3K27ac_true
chr20	290200	290400	bin9953998	H3K27ac_true
chr20	290400	290600	bin9953999	H3K27ac_true
chr20	290600	290800	bin9954000	H3K27ac_true
chr20	290800	291000	bin9954001	H3K27ac_true
chr20	346600	346800	bin9954220	H3K27ac_true
chr20	346800	347000	bin9954221	H3K27ac_true
chr20	544600	544800	bin9955001	H3K27ac_true
chr20	2664800	2665000	bin9963460	H3K27ac_true
chr20	3204800	3205000	bin9965506	H3K27ac_true
chr20	5112600	5112800	bin9972836	H3K27ac_true
chr20	5610000	5610200	bin9974539	H3K27ac_true
chr20	5610200	5610400	bin9974540	H3K27ac_true
chr20	8019000	8019200	bin9984428	H3K27ac_true
chr20	8019200	8019400	bin9984429	H3K27ac_true
chr20	17963400	17963600	bin10026665	H3K27ac_true
chr20	17963600	17963800	bin10026666	H3K27ac_true
chr20	17963800	17964000	bin10026667	H3K27ac_true
chr20	17967800	17968000	bin10026686	H3K27ac_true
chr20	17968000	17968200	bin10026687	H3K27ac_true
chr20	31720600	31720800	bin10058504	H3K27ac_true
chr20	35146400	35146600	bin10071526	H3K27ac_true
chr20	35456200	35456400	bin10072673	H3K27ac_true
chr20	35456400	35456600	bin10072674	H3K27ac_true
chr20	36573800	36574000	bin10076884	H3K27ac_true
chr20	36951000	36951200	bin10078178	H3K27ac_true
chr20	47502800	47503000	bin10121869	H3K27ac_true
chr20	50692400	50692600	bin10133808	H3K27ac_true
chr20	62366600	62366800	bin10183384	H3K27ac_true
chr20	62366800	62367000	bin10183385	H3K27ac_true
chr20	62367000	62367200	bin10183386	H3K27ac_true
chr20	63896000	63896200	bin10190071	H3K27ac_true
chr20	63969800	63970000	bin10190335	H3K27ac_true
chr19	925600	925800	bin10193942	H3K27ac_true
chr19	925800	926000	bin10193943	H3K27ac_true
chr19	926000	926200	bin10193944	H3K27ac_true
chr19	926200	926400	bin10193945	H3K27ac_true
chr19	926400	926600	bin10193946	H3K27ac_true
chr19	926600	926800	bin10193947	H3K27ac_true
chr19	926800	927000	bin10193948	H3K27ac_true
chr19	1020200	1020400	bin10194314	H3K27ac_true
chr19	1276400	1276600	bin10195311	H3K27ac_true
chr19	2237600	2237800	bin10198962	H3K27ac_true
chr19	2237800	2238000	bin10198963	H3K27ac_true
chr19	2269600	2269800	bin10199084	H3K27ac_true
chr19	2269800	2270000	bin10199085	H3K27ac_true
chr19	2270000	2270200	bin10199086	H3K27ac_true
chr19	2270200	2270400	bin10199087	H3K27ac_true
chr19	2270400	2270600	bin10199088	H3K27ac_true
chr19	3063400	3063600	bin10201817	H3K27ac_true
chr19	3500800	3501000	bin10203313	H3K27ac_true
chr19	3501000	3501200	bin10203314	H3K27ac_true
chr19	3501200	3501400	bin10203315	H3K27ac_true
chr19	6371600	6371800	bin10213406	H3K27ac_true
chr19	8322200	8322400	bin10219450	H3K27ac_true
chr19	10502200	10502400	bin10225623	H3K27ac_true
chr19	10502400	10502600	bin10225624	H3K27ac_true
chr19	10502600	10502800	bin10225625	H3K27ac_true
chr19	10502800	10503000	bin10225626	H3K27ac_true
chr19	10503000	10503200	bin10225627	H3K27ac_true
chr19	10653600	10653800	bin10226036	H3K27ac_true
chr19	10872000	10872200	bin10226788	H3K27ac_true
chr19	10872200	10872400	bin10226789	H3K27ac_true
chr19	10927800	10928000	bin10226989	H3K27ac_true
chr19	11088200	11088400	bin10227521	H3K27ac_true
chr19	11088400	11088600	bin10227522	H3K27ac_true
chr19	11088600	11088800	bin10227523	H3K27ac_true
chr19	11528200	11528400	bin10228910	H3K27ac_true
chr19	12800800	12801000	bin10231919	H3K27ac_true
chr19	12881400	12881600	bin10232185	H3K27ac_true
chr19	12888000	12888200	bin10232209	H3K27ac_true
chr19	13906800	13907000	bin10235748	H3K27ac_true
chr19	13907000	13907200	bin10235749	H3K27ac_true
chr19	16541400	16541600	bin10243661	H3K27ac_true
chr19	16543200	16543400	bin10243670	H3K27ac_true
chr19	16543400	16543600	bin10243671	H3K27ac_true
chr19	16571200	16571400	bin10243754	H3K27ac_true
chr19	16571400	16571600	bin10243755	H3K27ac_true
chr19	16627200	16627400	bin10244023	H3K27ac_true
chr19	17306400	17306600	bin10246172	H3K27ac_true
chr19	17860800	17861000	bin10247973	H3K27ac_true
chr19	18173400	18173600	bin10248961	H3K27ac_true
chr19	18322000	18322200	bin10249483	H3K27ac_true
chr19	18322200	18322400	bin10249484	H3K27ac_true
chr19	18322400	18322600	bin10249485	H3K27ac_true
chr19	18340800	18341000	bin10249532	H3K27ac_true
chr19	32346400	32346600	bin10276642	H3K27ac_true
chr19	32346600	32346800	bin10276643	H3K27ac_true
chr19	33081000	33081200	bin10279000	H3K27ac_true
chr19	33081200	33081400	bin10279001	H3K27ac_true
chr19	38316800	38317000	bin10296857	H3K27ac_true
chr19	45080000	45080200	bin10315957	H3K27ac_true
chr19	45080200	45080400	bin10315958	H3K27ac_true
chr19	45094000	45094200	bin10315999	H3K27ac_true
chr19	45250600	45250800	bin10316565	H3K27ac_true
chr19	45250800	45251000	bin10316566	H3K27ac_true
chr19	45251000	45251200	bin10316567	H3K27ac_true
chr19	45251200	45251400	bin10316568	H3K27ac_true
chr19	45369800	45370000	bin10316984	H3K27ac_true
chr19	45507400	45507600	bin10317447	H3K27ac_true
chr19	45507600	45507800	bin10317448	H3K27ac_true
chr19	45507800	45508000	bin10317449	H3K27ac_true
chr19	45646200	45646400	bin10317912	H3K27ac_true
chr19	45646400	45646600	bin10317913	H3K27ac_true
chr19	49118200	49118400	bin10329117	H3K27ac_true
chr19	49334800	49335000	bin10329793	H3K27ac_true
chr19	49850400	49850600	bin10331629	H3K27ac_true
chr19	49867800	49868000	bin10331709	H3K27ac_true
chr19	49868200	49868400	bin10331710	H3K27ac_true
chr19	49868400	49868600	bin10331711	H3K27ac_true
chr19	55386600	55386800	bin10346753	H3K27ac_true
chr19	55386800	55387000	bin10346754	H3K27ac_true
chr22	24271200	24271400	bin10399082	H3K27ac_true
chr22	24271400	24271600	bin10399083	H3K27ac_true
chr22	26589400	26589600	bin10407149	H3K27ac_true
chr22	27920200	27920400	bin10413118	H3K27ac_true
chr22	28773600	28773800	bin10416163	H3K27ac_true
chr22	29205000	29205200	bin10417846	H3K27ac_true
chr22	29205200	29205400	bin10417847	H3K27ac_true
chr22	29206800	29207000	bin10417855	H3K27ac_true
chr22	29387600	29387800	bin10418552	H3K27ac_true
chr22	29767400	29767600	bin10419806	H3K27ac_true
chr22	29767600	29767800	bin10419807	H3K27ac_true
chr22	29767800	29768000	bin10419808	H3K27ac_true
chr22	29768000	29768200	bin10419809	H3K27ac_true
chr22	29768200	29768400	bin10419810	H3K27ac_true
chr22	30607600	30607800	bin10423078	H3K27ac_true
chr22	31211600	31211800	bin10425192	H3K27ac_true
chr22	31211800	31212000	bin10425193	H3K27ac_true
chr22	31495600	31495800	bin10426203	H3K27ac_true
chr22	31497000	31497200	bin10426210	H3K27ac_true
chr22	35257200	35257400	bin10440684	H3K27ac_true
chr22	36528400	36528600	bin10445561	H3K27ac_true
chr22	36528600	36528800	bin10445562	H3K27ac_true
chr22	37019400	37019600	bin10447672	H3K27ac_true
chr22	37607400	37607600	bin10450244	H3K27ac_true
chr22	37659200	37659400	bin10450466	H3K27ac_true
chr22	37659400	37659600	bin10450467	H3K27ac_true
chr22	37659600	37659800	bin10450468	H3K27ac_true
chr22	37806800	37807000	bin10451011	H3K27ac_true
chr22	37807000	37807200	bin10451012	H3K27ac_true
chr22	37807200	37807400	bin10451013	H3K27ac_true
chr22	37807400	37807600	bin10451014	H3K27ac_true
chr22	37807600	37807800	bin10451015	H3K27ac_true
chr22	37807800	37808000	bin10451016	H3K27ac_true
chr22	37808000	37808200	bin10451017	H3K27ac_true
chr22	37905600	37905800	bin10451345	H3K27ac_true
chr22	38318000	38318200	bin10453020	H3K27ac_true
chr22	38318200	38318400	bin10453021	H3K27ac_true
chr22	38318400	38318600	bin10453022	H3K27ac_true
chr22	38318600	38318800	bin10453023	H3K27ac_true
chr22	38318800	38319000	bin10453024	H3K27ac_true
chr22	38319000	38319200	bin10453025	H3K27ac_true
chr22	38682600	38682800	bin10454189	H3K27ac_true
chr22	38682800	38683000	bin10454190	H3K27ac_true
chr22	39318800	39319000	bin10456321	H3K27ac_true
chr22	39319000	39319200	bin10456322	H3K27ac_true
chr22	39533600	39533800	bin10457172	H3K27ac_true
chr22	39900400	39900600	bin10458687	H3K27ac_true
chr22	40370200	40370400	bin10460653	H3K27ac_true
chr22	40819800	40820000	bin10462250	H3K27ac_true
chr22	40857400	40857600	bin10462400	H3K27ac_true
chr22	40857600	40857800	bin10462401	H3K27ac_true
chr22	41092800	41093000	bin10463111	H3K27ac_true
chr22	41093000	41093200	bin10463112	H3K27ac_true
chr22	41093200	41093400	bin10463113	H3K27ac_true
chr22	41093400	41093600	bin10463114	H3K27ac_true
chr22	41093600	41093800	bin10463115	H3K27ac_true
chr22	41285600	41285800	bin10463851	H3K27ac_true
chr22	41285800	41286000	bin10463852	H3K27ac_true
chr22	41287000	41287200	bin10463858	H3K27ac_true
chr22	41543800	41544000	bin10464775	H3K27ac_true
chr22	46249200	46249400	bin10482938	H3K27ac_true
chr22	50201600	50201800	bin10500124	H3K27ac_true
chr22	50201800	50202000	bin10500125	H3K27ac_true
chr21	14582800	14583000	bin10504146	H3K27ac_true
chr21	14583000	14583200	bin10504147	H3K27ac_true
chr21	14583200	14583400	bin10504148	H3K27ac_true
chr21	14583400	14583600	bin10504149	H3K27ac_true
chr21	14583600	14583800	bin10504150	H3K27ac_true
chr21	14583800	14584000	bin10504151	H3K27ac_true
chr21	14584000	14584200	bin10504152	H3K27ac_true
chr21	14584200	14584400	bin10504153	H3K27ac_true
chr21	14584400	14584600	bin10504154	H3K27ac_true
chr21	33543600	33543800	bin10579599	H3K27ac_true
chr21	33543800	33544000	bin10579600	H3K27ac_true
chr21	33544000	33544200	bin10579601	H3K27ac_true
chr1	1168600	1168800	bin1139	H3K27ac_false
chr1	1168800	1169000	bin1140	H3K27ac_false
chr1	1169000	1169200	bin1141	H3K27ac_false
chr1	1169200	1169400	bin1142	H3K27ac_false
chr1	1169400	1169600	bin1143	H3K27ac_false
chr1	1169600	1169800	bin1144	H3K27ac_false
chr1	6466000	6466200	bin22222	H3K27ac_false
chr1	6466200	6466400	bin22223	H3K27ac_false
chr1	6466400	6466600	bin22224	H3K27ac_false
chr1	6466800	6467000	bin22225	H3K27ac_false
chr1	6467000	6467200	bin22226	H3K27ac_false
chr1	16072600	16072800	bin57425	H3K27ac_false
chr1	16072800	16073000	bin57426	H3K27ac_false
chr1	16073000	16073200	bin57427	H3K27ac_false
chr1	16073200	16073400	bin57428	H3K27ac_false
chr1	16073400	16073600	bin57429	H3K27ac_false
chr1	16073600	16073800	bin57430	H3K27ac_false
chr1	16073800	16074000	bin57431	H3K27ac_false
chr1	16074000	16074200	bin57432	H3K27ac_false
chr1	16074200	16074400	bin57433	H3K27ac_false
chr1	31757600	31757800	bin115532	H3K27ac_false
chr1	31757800	31758000	bin115533	H3K27ac_false
chr1	31758000	31758200	bin115534	H3K27ac_false
chr1	31758200	31758400	bin115535	H3K27ac_false
chr1	31758400	31758600	bin115536	H3K27ac_false
chr1	31758600	31758800	bin115537	H3K27ac_false
chr1	31758800	31759000	bin115538	H3K27ac_false
chr1	31759000	31759200	bin115539	H3K27ac_false
chr1	31759200	31759400	bin115540	H3K27ac_false
chr1	31759400	31759600	bin115541	H3K27ac_false
chr1	31759600	31759800	bin115542	H3K27ac_false
chr1	54017200	54017400	bin200304	H3K27ac_false
chr1	54017400	54017600	bin200305	H3K27ac_false
chr1	54017600	54017800	bin200306	H3K27ac_false
chr1	54017800	54018000	bin200307	H3K27ac_false
chr1	54018000	54018200	bin200308	H3K27ac_false
chr1	54018200	54018400	bin200309	H3K27ac_false
chr1	54018400	54018600	bin200310	H3K27ac_false
chr1	54018600	54018800	bin200311	H3K27ac_false
chr1	54018800	54019000	bin200312	H3K27ac_false
chr1	54019000	54019200	bin200313	H3K27ac_false
chr2	25041600	25041800	bin948148	H3K27ac_false
chr2	25041800	25042000	bin948149	H3K27ac_false
chr2	25042000	25042200	bin948150	H3K27ac_false
chr2	25042200	25042400	bin948151	H3K27ac_false
chr2	25042400	25042600	bin948152	H3K27ac_false
chr2	25042600	25042800	bin948153	H3K27ac_false
chr2	25042800	25043000	bin948154	H3K27ac_false
chr2	25043000	25043200	bin948155	H3K27ac_false
chr3	42732000	42732200	bin1937105	H3K27ac_false
chr3	42732200	42732400	bin1937106	H3K27ac_false
chr3	42732400	42732600	bin1937107	H3K27ac_false
chr3	42732600	42732800	bin1937108	H3K27ac_false
chr3	42732800	42733000	bin1937109	H3K27ac_false
chr3	42733000	42733200	bin1937110	H3K27ac_false
chr3	42733200	42733400	bin1937111	H3K27ac_false
chr3	42733400	42733600	bin1937112	H3K27ac_false
chr3	52793800	52794000	bin1974000	H3K27ac_false
chr3	52794000	52794200	bin1974001	H3K27ac_false
chr3	52794200	52794400	bin1974002	H3K27ac_false
chr3	52794400	52794600	bin1974003	H3K27ac_false
chr3	52794600	52794800	bin1974004	H3K27ac_false
chr3	52794800	52795000	bin1974005	H3K27ac_false
chr3	52795000	52795200	bin1974006	H3K27ac_false
chr3	52795200	52795400	bin1974007	H3K27ac_false
chr3	52795400	52795600	bin1974008	H3K27ac_false
chr3	52795600	52795800	bin1974009	H3K27ac_false
chr3	128466200	128466400	bin2258403	H3K27ac_false
chr3	128466400	128466600	bin2258404	H3K27ac_false
chr3	128466600	128466800	bin2258405	H3K27ac_false
chr3	128466800	128467000	bin2258406	H3K27ac_false
chr3	128467000	128467200	bin2258407	H3K27ac_false
chr3	128467200	128467400	bin2258408	H3K27ac_false
chr3	128467400	128467600	bin2258409	H3K27ac_false
chr3	128467600	128467800	bin2258410	H3K27ac_false
chr3	128467800	128468000	bin2258411	H3K27ac_false
chr3	128468000	128468200	bin2258412	H3K27ac_false
chr4	3074000	3074200	bin2540029	H3K27ac_false
chr4	3074200	3074400	bin2540030	H3K27ac_false
chr4	8158200	8158400	bin2559812	H3K27ac_false
chr4	8158400	8158600	bin2559813	H3K27ac_false
chr4	8158600	8158800	bin2559814	H3K27ac_false
chr4	8158800	8159000	bin2559815	H3K27ac_false
chr5	177384400	177384600	bin3917131	H3K27ac_false
chr5	177384600	177384800	bin3917132	H3K27ac_false
chr5	177384800	177385000	bin3917133	H3K27ac_false
chr6	33191400	33191600	bin4057861	H3K27ac_false
chr6	33191600	33191800	bin4057862	H3K27ac_false
chr6	33191800	33192000	bin4057863	H3K27ac_false
chr6	33192000	33192200	bin4057864	H3K27ac_false
chr6	33192200	33192400	bin4057865	H3K27ac_false
chr6	33192400	33192600	bin4057866	H3K27ac_false
chr6	33192600	33192800	bin4057867	H3K27ac_false
chr6	33192800	33193000	bin4057868	H3K27ac_false
chr6	33193000	33193200	bin4057869	H3K27ac_false
chr6	35797200	35797400	bin4067681	H3K27ac_false
chr6	35797400	35797600	bin4067682	H3K27ac_false
chr6	35797600	35797800	bin4067683	H3K27ac_false
chr6	35797800	35798000	bin4067684	H3K27ac_false
chr6	35798000	35798200	bin4067685	H3K27ac_false
chr6	35798200	35798400	bin4067686	H3K27ac_false
chr6	36623200	36623400	bin4070850	H3K27ac_false
chr6	36623400	36623600	bin4070851	H3K27ac_false
chr6	125748400	125748600	bin4401538	H3K27ac_false
chr6	125748600	125748800	bin4401539	H3K27ac_false
chr6	125748800	125749000	bin4401540	H3K27ac_false
chr6	125749000	125749200	bin4401541	H3K27ac_false
chr6	125749200	125749400	bin4401542	H3K27ac_false
chr6	125749400	125749600	bin4401543	H3K27ac_false
chr6	125749600	125749800	bin4401544	H3K27ac_false
chr7	149200	149400	bin4582395	H3K27ac_false
chr7	149400	149600	bin4582396	H3K27ac_false
chr7	44109800	44110000	bin4752405	H3K27ac_false
chr7	44111000	44111200	bin4752411	H3K27ac_false
chr7	44111200	44111400	bin4752412	H3K27ac_false
chr7	44111400	44111600	bin4752413	H3K27ac_false
chr7	44111600	44111800	bin4752414	H3K27ac_false
chr7	44111800	44112000	bin4752415	H3K27ac_false
chr7	101020000	101020200	bin4919755	H3K27ac_false
chr7	101020200	101020400	bin4919756	H3K27ac_false
chr7	101020400	101020600	bin4919757	H3K27ac_false
chr7	101020600	101020800	bin4919758	H3K27ac_false
chr7	101020800	101021000	bin4919759	H3K27ac_false
chr7	101021000	101021200	bin4919760	H3K27ac_false
chr7	151432600	151432800	bin5111622	H3K27ac_false
chr7	151432800	151433000	bin5111623	H3K27ac_false
chr7	151433000	151433200	bin5111624	H3K27ac_false
chr7	151433200	151433400	bin5111625	H3K27ac_false
chr7	151433400	151433600	bin5111626	H3K27ac_false
chr7	151433600	151433800	bin5111627	H3K27ac_false
chr7	151433800	151434000	bin5111628	H3K27ac_false
chr7	151434000	151434200	bin5111629	H3K27ac_false
chr9	136204000	136204200	bin6585708	H3K27ac_false
chr9	136204200	136204400	bin6585709	H3K27ac_false
chr9	136305800	136306000	bin6586173	H3K27ac_false
chr9	136306000	136306200	bin6586174	H3K27ac_false
chr9	136306200	136306400	bin6586175	H3K27ac_false
chr9	137168200	137168400	bin6589715	H3K27ac_false
chr9	137168400	137168600	bin6589716	H3K27ac_false
chr9	137168600	137168800	bin6589717	H3K27ac_false
chr9	137168800	137169000	bin6589718	H3K27ac_false
chr9	137169000	137169200	bin6589719	H3K27ac_false
chr9	137171000	137171200	bin6589729	H3K27ac_false
chr9	137171200	137171400	bin6589730	H3K27ac_false
chr9	137171400	137171600	bin6589731	H3K27ac_false
chr9	137171600	137171800	bin6589732	H3K27ac_false
chr9	137171800	137172000	bin6589733	H3K27ac_false
chr9	137172000	137172200	bin6589734	H3K27ac_false
chr9	137172200	137172400	bin6589735	H3K27ac_false
chr9	137172400	137172600	bin6589736	H3K27ac_false
chr9	137172600	137172800	bin6589737	H3K27ac_false
chr9	137172800	137173000	bin6589738	H3K27ac_false
chr11	33774200	33774400	bin6724622	H3K27ac_false
chr11	33774400	33774600	bin6724623	H3K27ac_false
chr11	33774600	33774800	bin6724624	H3K27ac_false
chr11	33774800	33775000	bin6724625	H3K27ac_false
chr11	75768800	75769000	bin6854051	H3K27ac_false
chr11	75769000	75769200	bin6854052	H3K27ac_false
chr11	75769200	75769400	bin6854053	H3K27ac_false
chr11	75769400	75769600	bin6854054	H3K27ac_false
chr10	5499400	5499600	bin7109532	H3K27ac_false
chr10	43372600	43372800	bin7235175	H3K27ac_false
chr10	46556600	46556800	bin7243786	H3K27ac_false
chr10	46556800	46557000	bin7243787	H3K27ac_false
chr10	46557000	46557200	bin7243788	H3K27ac_false
chr10	71789600	71789800	bin7337635	H3K27ac_false
chr10	71789800	71790000	bin7337636	H3K27ac_false
chr10	71790000	71790200	bin7337637	H3K27ac_false
chr10	71790200	71790400	bin7337638	H3K27ac_false
chr10	71790400	71790600	bin7337639	H3K27ac_false
chr10	71790600	71790800	bin7337640	H3K27ac_false
chr10	71790800	71791000	bin7337641	H3K27ac_false
chr12	57146600	57146800	bin7780816	H3K27ac_false
chr12	57146800	57147000	bin7780817	H3K27ac_false
chr12	57147000	57147200	bin7780818	H3K27ac_false
chr12	57147200	57147400	bin7780819	H3K27ac_false
chr12	57147400	57147600	bin7780820	H3K27ac_false
chr12	57147600	57147800	bin7780821	H3K27ac_false
chr12	57147800	57148000	bin7780822	H3K27ac_false
chr12	57148000	57148200	bin7780823	H3K27ac_false
chr12	57148200	57148400	bin7780824	H3K27ac_false
chr12	57148400	57148600	bin7780825	H3K27ac_false
chr12	57148600	57148800	bin7780826	H3K27ac_false
chr14	99684000	99684200	bin8771756	H3K27ac_false
chr14	99684200	99684400	bin8771757	H3K27ac_false
chr15	40252000	40252200	bin8854027	H3K27ac_false
chr15	40252200	40252400	bin8854028	H3K27ac_false
chr15	40252400	40252600	bin8854029	H3K27ac_false
chr15	40252600	40252800	bin8854030	H3K27ac_false
chr15	40252800	40253000	bin8854031	H3K27ac_false
chr15	40253000	40253200	bin8854032	H3K27ac_false
chr15	40253200	40253400	bin8854033	H3K27ac_false
chr15	40253400	40253600	bin8854034	H3K27ac_false
chr15	40253600	40253800	bin8854035	H3K27ac_false
chr15	40253800	40254000	bin8854036	H3K27ac_false
chr15	64763400	64763600	bin8947629	H3K27ac_false
chr15	77659000	77659200	bin8998018	H3K27ac_false
chr15	77659200	77659400	bin8998019	H3K27ac_false
chr15	77659400	77659600	bin8998020	H3K27ac_false
chr15	77659600	77659800	bin8998021	H3K27ac_false
chr15	77659800	77660000	bin8998022	H3K27ac_false
chr16	11273000	11273200	bin9134628	H3K27ac_false
chr16	11273200	11273400	bin9134629	H3K27ac_false
chr16	11273400	11273600	bin9134630	H3K27ac_false
chr16	11273600	11273800	bin9134631	H3K27ac_false
chr16	11273800	11274000	bin9134632	H3K27ac_false
chr16	11274000	11274200	bin9134633	H3K27ac_false
chr16	11274200	11274400	bin9134634	H3K27ac_false
chr16	75218400	75218600	bin9310846	H3K27ac_false
chr16	75218600	75218800	bin9310847	H3K27ac_false
chr16	75218800	75219000	bin9310848	H3K27ac_false
chr16	75219000	75219200	bin9310849	H3K27ac_false
chr16	85752000	85752200	bin9355632	H3K27ac_false
chr16	89172400	89172600	bin9369084	H3K27ac_false
chr17	35147200	35147400	bin9475459	H3K27ac_false
chr17	35147400	35147600	bin9475460	H3K27ac_false
chr17	35147600	35147800	bin9475461	H3K27ac_false
chr17	35147800	35148000	bin9475462	H3K27ac_false
chr17	45894400	45894600	bin9510450	H3K27ac_false
chr17	45894600	45894800	bin9510451	H3K27ac_false
chr17	76140200	76140400	bin9622973	H3K27ac_false
chr17	76140400	76140600	bin9622974	H3K27ac_false
chr17	76140600	76140800	bin9622975	H3K27ac_false
chr17	76140800	76141000	bin9622976	H3K27ac_false
chr17	76141000	76141200	bin9622977	H3K27ac_false
chr17	76141200	76141400	bin9622978	H3K27ac_false
chr17	76141400	76141600	bin9622979	H3K27ac_false
chr17	76141600	76141800	bin9622980	H3K27ac_false
chr17	76141800	76142000	bin9622981	H3K27ac_false
chr17	81126600	81126800	bin9643273	H3K27ac_false
chr17	81126800	81127000	bin9643274	H3K27ac_false
chr17	81164800	81165000	bin9643442	H3K27ac_false
chr17	81165000	81165200	bin9643443	H3K27ac_false
chr17	81165200	81165400	bin9643444	H3K27ac_false
chr17	81165400	81165600	bin9643445	H3K27ac_false
chr17	81804800	81805000	bin9645843	H3K27ac_false
chr17	81805000	81805200	bin9645844	H3K27ac_false
chr20	46307400	46307600	bin10117034	H3K27ac_false
chr20	46307600	46307800	bin10117035	H3K27ac_false
chr20	46307800	46308000	bin10117036	H3K27ac_false
chr20	46308000	46308200	bin10117037	H3K27ac_false
chr20	46308200	46308400	bin10117038	H3K27ac_false
chr20	46308400	46308600	bin10117039	H3K27ac_false
chr20	46308600	46308800	bin10117040	H3K27ac_false
chr20	46308800	46309000	bin10117041	H3K27ac_false
chr19	12752400	12752600	bin10231740	H3K27ac_false
chr19	12752600	12752800	bin10231741	H3K27ac_false
chr19	35666400	35666600	bin10288420	H3K27ac_false
chr19	35666600	35666800	bin10288421	H3K27ac_false
chr19	35666800	35667000	bin10288422	H3K27ac_false
chr19	49056000	49056200	bin10328912	H3K27ac_false
chr19	49056200	49056400	bin10328913	H3K27ac_false
chr19	54906000	54906200	bin10345180	H3K27ac_false
chr19	54906200	54906400	bin10345181	H3K27ac_false
chr19	54906400	54906600	bin10345182	H3K27ac_false
chr19	54906600	54906800	bin10345183	H3K27ac_false
chr22	19129800	19130000	bin10384670	H3K27ac_false
chr22	19149200	19149400	bin10384753	H3K27ac_false
chr22	19149400	19149600	bin10384754	H3K27ac_false
chr22	20203800	20204000	bin10388791	H3K27ac_false
chr22	20204000	20204200	bin10388792	H3K27ac_false
chr22	20204200	20204400	bin10388793	H3K27ac_false
chr22	20204400	20204600	bin10388794	H3K27ac_false
chr22	20204600	20204800	bin10388795	H3K27ac_false
chr22	20248200	20248400	bin10389003	H3K27ac_false
chr22	20248400	20248600	bin10389004	H3K27ac_false
chr22	20248600	20248800	bin10389005	H3K27ac_false
chr22	20248800	20249000	bin10389006	H3K27ac_false
chr22	20249000	20249200	bin10389007	H3K27ac_false
chr22	20249200	20249400	bin10389008	H3K27ac_false
chr22	20249400	20249600	bin10389009	H3K27ac_false
chr22	20249600	20249800	bin10389010	H3K27ac_false
chr22	20249800	20250000	bin10389011	H3K27ac_false
chr22	20250000	20250200	bin10389012	H3K27ac_false
chr22	21033200	21033400	bin10391187	H3K27ac_false
chr22	21033400	21033600	bin10391188	H3K27ac_false
chr22	21033600	21033800	bin10391189	H3K27ac_false
chr22	21033800	21034000	bin10391190	H3K27ac_false
chr22	21034000	21034200	bin10391191	H3K27ac_false
chr22	21043200	21043400	bin10391209	H3K27ac_false
chr22	21043400	21043600	bin10391210	H3K27ac_false
chr22	21043600	21043800	bin10391211	H3K27ac_false
chr22	22885200	22885400	bin10395287	H3K27ac_false
chr22	22885400	22885600	bin10395288	H3K27ac_false
chr22	22885600	22885800	bin10395289	H3K27ac_false
chr22	22885800	22886000	bin10395290	H3K27ac_false
chr22	22886000	22886200	bin10395291	H3K27ac_false
chr22	22886200	22886400	bin10395292	H3K27ac_false
chr22	22886400	22886600	bin10395293	H3K27ac_false
chr22	22886600	22886800	bin10395294	H3K27ac_false
chr22	22886800	22887000	bin10395295	H3K27ac_false
chr22	22887000	22887200	bin10395296	H3K27ac_false
chr22	22887200	22887400	bin10395297	H3K27ac_false
chr22	22887400	22887600	bin10395298	H3K27ac_false
chr22	22887600	22887800	bin10395299	H3K27ac_false
chr22	22887800	22888000	bin10395300	H3K27ac_false
chr22	22888000	22888200	bin10395301	H3K27ac_false
chr22	22888200	22888400	bin10395302	H3K27ac_false
chr22	22888400	22888600	bin10395303	H3K27ac_false
chr22	22888600	22888800	bin10395304	H3K27ac_false
chr22	23141800	23142000	bin10396213	H3K27ac_false
chr22	23142000	23142200	bin10396214	H3K27ac_false
chr22	23142200	23142400	bin10396215	H3K27ac_false
chr22	23142600	23142800	bin10396216	H3K27ac_false
chr22	23142800	23143000	bin10396217	H3K27ac_false
chr22	23143000	23143200	bin10396218	H3K27ac_false
chr21	42496200	42496400	bin10616926	H3K27ac_false
chr21	42496400	42496600	bin10616927	H3K27ac_false
chr21	42496600	42496800	bin10616928	H3K27ac_false
chr21	45003600	45003800	bin10624577	H3K27ac_false
chr21	45003800	45004000	bin10624578	H3K27ac_false
chr21	45004000	45004200	bin10624579	H3K27ac_false
chr21	45004200	45004400	bin10624580	H3K27ac_false
chr21	45004400	45004600	bin10624581	H3K27ac_false
chr21	45004600	45004800	bin10624582	H3K27ac_false
chr21	45004800	45005000	bin10624583	H3K27ac_false

## Sheet: Table S6
chromosome	start	end	binID	region category
chr1	4946200	4946400	bin15988	H3K9me3_true
chr1	5009000	5009200	bin16281	H3K9me3_true
chr1	9288200	9288400	bin33390	H3K9me3_true
chr1	9289000	9289200	bin33394	H3K9me3_true
chr1	10928800	10929000	bin39622	H3K9me3_true
chr1	11504000	11504200	bin41825	H3K9me3_true
chr1	12638600	12638800	bin46432	H3K9me3_true
chr1	12639600	12639800	bin46435	H3K9me3_true
chr1	17755200	17755400	bin62144	H3K9me3_true
chr1	17757800	17758000	bin62157	H3K9me3_true
chr1	18231800	18232000	bin64314	H3K9me3_true
chr1	19536200	19536400	bin69934	H3K9me3_true
chr1	19549600	19549800	bin69945	H3K9me3_true
chr1	20160800	20161000	bin72149	H3K9me3_true
chr1	20161400	20161600	bin72152	H3K9me3_true
chr1	22577600	22577800	bin81370	H3K9me3_true
chr1	23362400	23362600	bin84589	H3K9me3_true
chr1	29562400	29562600	bin106866	H3K9me3_true
chr1	31458600	31458800	bin114299	H3K9me3_true
chr1	33495000	33495200	bin121833	H3K9me3_true
chr1	33495200	33495400	bin121834	H3K9me3_true
chr1	38792800	38793000	bin143502	H3K9me3_true
chr1	40490200	40490400	bin149609	H3K9me3_true
chr1	41761200	41761400	bin154830	H3K9me3_true
chr1	46770800	46771000	bin173712	H3K9me3_true
chr1	48292400	48292600	bin178841	H3K9me3_true
chr1	48292600	48292800	bin178842	H3K9me3_true
chr1	48330000	48330200	bin178950	H3K9me3_true
chr1	48854200	48854400	bin181149	H3K9me3_true
chr1	48890000	48890200	bin181316	H3K9me3_true
chr1	49085800	49086000	bin182123	H3K9me3_true
chr1	49086000	49086200	bin182124	H3K9me3_true
chr1	49181000	49181200	bin182466	H3K9me3_true
chr1	49181200	49181400	bin182467	H3K9me3_true
chr1	49250800	49251000	bin182766	H3K9me3_true
chr1	49251000	49251200	bin182767	H3K9me3_true
chr1	49582200	49582400	bin183793	H3K9me3_true
chr1	49582400	49582600	bin183794	H3K9me3_true
chr1	49650800	49651000	bin184060	H3K9me3_true
chr1	49730600	49730800	bin184321	H3K9me3_true
chr1	49893800	49894000	bin184800	H3K9me3_true
chr1	49913600	49913800	bin184857	H3K9me3_true
chr1	53100000	53100200	bin196442	H3K9me3_true
chr1	68576200	68576400	bin260343	H3K9me3_true
chr1	68953400	68953600	bin261709	H3K9me3_true
chr1	68980800	68981000	bin261832	H3K9me3_true
chr1	69157400	69157600	bin262408	H3K9me3_true
chr1	70745600	70745800	bin268733	H3K9me3_true
chr1	72221800	72222000	bin274858	H3K9me3_true
chr1	72449800	72450000	bin275711	H3K9me3_true
chr1	72450200	72450400	bin275713	H3K9me3_true
chr1	73770000	73770200	bin280912	H3K9me3_true
chr1	76670400	76670600	bin292284	H3K9me3_true
chr1	78450000	78450200	bin299203	H3K9me3_true
chr1	78473600	78473800	bin299278	H3K9me3_true
chr1	79559000	79559200	bin303675	H3K9me3_true
chr1	81175000	81175200	bin310138	H3K9me3_true
chr1	86105200	86105400	bin329306	H3K9me3_true
chr1	88433600	88433800	bin338651	H3K9me3_true
chr1	88918600	88918800	bin340533	H3K9me3_true
chr1	97845000	97845200	bin374780	H3K9me3_true
chr1	98638000	98638200	bin378163	H3K9me3_true
chr1	103961000	103961200	bin398032	H3K9me3_true
chr1	106121800	106122000	bin405831	H3K9me3_true
chr1	106264800	106265000	bin406372	H3K9me3_true
chr1	106306600	106306800	bin406561	H3K9me3_true
chr1	106307000	106307200	bin406563	H3K9me3_true
chr1	116744800	116745000	bin446509	H3K9me3_true
chr1	117772000	117772200	bin450696	H3K9me3_true
chr1	118462000	118462200	bin453458	H3K9me3_true
chr1	163864400	163864600	bin513280	H3K9me3_true
chr1	163885000	163885200	bin513369	H3K9me3_true
chr1	164017400	164017600	bin513842	H3K9me3_true
chr1	164017600	164017800	bin513843	H3K9me3_true
chr1	164054800	164055000	bin513999	H3K9me3_true
chr1	164337800	164338000	bin515059	H3K9me3_true
chr1	164342200	164342400	bin515079	H3K9me3_true
chr1	167317200	167317400	bin527113	H3K9me3_true
chr1	168452400	168452600	bin531613	H3K9me3_true
chr1	170191600	170191800	bin538409	H3K9me3_true
chr1	170191800	170192000	bin538410	H3K9me3_true
chr1	170367400	170367600	bin539133	H3K9me3_true
chr1	170367800	170368000	bin539135	H3K9me3_true
chr1	170729600	170729800	bin540486	H3K9me3_true
chr1	170751800	170752000	bin540583	H3K9me3_true
chr1	170886200	170886400	bin541097	H3K9me3_true
chr1	170892000	170892200	bin541126	H3K9me3_true
chr1	170969800	170970000	bin541422	H3K9me3_true
chr1	171013200	171013400	bin541569	H3K9me3_true
chr1	177218000	177218200	bin564993	H3K9me3_true
chr1	177270800	177271000	bin565230	H3K9me3_true
chr1	177304800	177305000	bin565372	H3K9me3_true
chr1	177347000	177347200	bin565545	H3K9me3_true
chr1	177461800	177462000	bin566001	H3K9me3_true
chr1	177483800	177484000	bin566108	H3K9me3_true
chr1	177710000	177710200	bin566992	H3K9me3_true
chr1	177770200	177770400	bin567197	H3K9me3_true
chr1	177792600	177792800	bin567306	H3K9me3_true
chr1	177816000	177816200	bin567392	H3K9me3_true
chr1	177820200	177820400	bin567411	H3K9me3_true
chr1	177820800	177821000	bin567414	H3K9me3_true
chr1	177824000	177824200	bin567430	H3K9me3_true
chr1	177848800	177849000	bin567540	H3K9me3_true
chr1	177877200	177877400	bin567668	H3K9me3_true
chr1	181161600	181161800	bin580349	H3K9me3_true
chr1	185799800	185800000	bin599121	H3K9me3_true
chr1	186513000	186513200	bin602182	H3K9me3_true
chr1	186513200	186513400	bin602183	H3K9me3_true
chr1	186541000	186541200	bin602270	H3K9me3_true
chr1	186541200	186541400	bin602271	H3K9me3_true
chr1	186541400	186541600	bin602272	H3K9me3_true
chr1	186578800	186579000	bin602404	H3K9me3_true
chr1	186579000	186579200	bin602405	H3K9me3_true
chr1	186764400	186764600	bin603058	H3K9me3_true
chr1	186764800	186765000	bin603060	H3K9me3_true
chr1	186964800	186965000	bin603912	H3K9me3_true
chr1	187172000	187172200	bin604723	H3K9me3_true
chr1	187465400	187465600	bin605900	H3K9me3_true
chr1	187836000	187836200	bin607305	H3K9me3_true
chr1	188128800	188129000	bin608561	H3K9me3_true
chr1	188189000	188189200	bin608827	H3K9me3_true
chr1	188356200	188356400	bin609405	H3K9me3_true
chr1	188701800	188702000	bin610859	H3K9me3_true
chr1	188703400	188703600	bin610867	H3K9me3_true
chr1	189859800	189860000	bin615357	H3K9me3_true
chr1	189860000	189860200	bin615358	H3K9me3_true
chr1	189860200	189860400	bin615359	H3K9me3_true
chr1	189909600	189909800	bin615569	H3K9me3_true
chr1	189921600	189921800	bin615614	H3K9me3_true
chr1	190295000	190295200	bin617185	H3K9me3_true
chr1	191282200	191282400	bin621083	H3K9me3_true
chr1	191983000	191983200	bin623830	H3K9me3_true
chr1	192642000	192642200	bin626599	H3K9me3_true
chr1	193581200	193581400	bin630298	H3K9me3_true
chr1	193623200	193623400	bin630491	H3K9me3_true
chr1	193654800	193655000	bin630578	H3K9me3_true
chr1	193655000	193655200	bin630579	H3K9me3_true
chr1	193655400	193655600	bin630581	H3K9me3_true
chr1	194033600	194033800	bin632032	H3K9me3_true
chr1	194103000	194103200	bin632331	H3K9me3_true
chr1	194297000	194297200	bin633113	H3K9me3_true
chr1	194437600	194437800	bin633641	H3K9me3_true
chr1	195030800	195031000	bin635964	H3K9me3_true
chr1	195218800	195219000	bin636668	H3K9me3_true
chr1	195237200	195237400	bin636756	H3K9me3_true
chr1	195238400	195238600	bin636760	H3K9me3_true
chr1	196538200	196538400	bin641971	H3K9me3_true
chr1	199029800	199030000	bin651420	H3K9me3_true
chr1	199046000	199046200	bin651490	H3K9me3_true
chr1	199138800	199139000	bin651846	H3K9me3_true
chr1	199174400	199174600	bin652017	H3K9me3_true
chr1	199218200	199218400	bin652187	H3K9me3_true
chr1	199221800	199222000	bin652201	H3K9me3_true
chr1	199222000	199222200	bin652202	H3K9me3_true
chr1	199351400	199351600	bin652718	H3K9me3_true
chr1	199392400	199392600	bin652882	H3K9me3_true
chr1	199408600	199408800	bin652955	H3K9me3_true
chr1	199457200	199457400	bin653106	H3K9me3_true
chr1	199537800	199538000	bin653452	H3K9me3_true
chr1	199538000	199538200	bin653453	H3K9me3_true
chr1	207153200	207153400	bin682969	H3K9me3_true
chr1	208812400	208812600	bin689308	H3K9me3_true
chr1	208843000	208843200	bin689454	H3K9me3_true
chr1	209012400	209012600	bin690156	H3K9me3_true
chr1	209022600	209022800	bin690196	H3K9me3_true
chr1	209049800	209050000	bin690319	H3K9me3_true
chr1	209051800	209052000	bin690321	H3K9me3_true
chr1	209082200	209082400	bin690435	H3K9me3_true
chr1	209123600	209123800	bin690635	H3K9me3_true
chr1	214765000	214765200	bin713063	H3K9me3_true
chr1	214799000	214799200	bin713170	H3K9me3_true
chr1	215112800	215113000	bin714504	H3K9me3_true
chr1	215182400	215182600	bin714768	H3K9me3_true
chr1	215292000	215292200	bin715257	H3K9me3_true
chr1	215733800	215734000	bin716964	H3K9me3_true
chr1	216064200	216064400	bin718382	H3K9me3_true
chr1	216626400	216626600	bin720855	H3K9me3_true
chr1	216964400	216964600	bin722434	H3K9me3_true
chr1	216999000	216999200	bin722596	H3K9me3_true
chr1	217254000	217254200	bin723742	H3K9me3_true
chr1	217402400	217402600	bin724325	H3K9me3_true
chr1	217674400	217674600	bin725515	H3K9me3_true
chr1	217962400	217962600	bin726740	H3K9me3_true
chr1	218104400	218104600	bin727280	H3K9me3_true
chr1	218689800	218690000	bin729776	H3K9me3_true
chr1	218855600	218855800	bin730451	H3K9me3_true
chr1	218855800	218856000	bin730452	H3K9me3_true
chr1	221249200	221249400	bin740031	H3K9me3_true
chr1	221504800	221505000	bin741042	H3K9me3_true
chr1	222157800	222158000	bin743737	H3K9me3_true
chr1	226339400	226339600	bin758548	H3K9me3_true
chr1	227618400	227618600	bin763345	H3K9me3_true
chr1	227644200	227644400	bin763388	H3K9me3_true
chr1	227651600	227651800	bin763418	H3K9me3_true
chr1	227651800	227652000	bin763419	H3K9me3_true
chr1	227661600	227661800	bin763461	H3K9me3_true
chr1	227815400	227815600	bin763989	H3K9me3_true
chr1	228241000	228241200	bin765602	H3K9me3_true
chr1	228242800	228243000	bin765610	H3K9me3_true
chr1	228302600	228302800	bin765846	H3K9me3_true
chr1	228312200	228312400	bin765889	H3K9me3_true
chr1	228312600	228312800	bin765891	H3K9me3_true
chr1	228312800	228313000	bin765892	H3K9me3_true
chr1	228344000	228344200	bin766032	H3K9me3_true
chr1	232038000	232038200	bin780407	H3K9me3_true
chr1	232760000	232760200	bin783496	H3K9me3_true
chr1	233561000	233561200	bin786893	H3K9me3_true
chr1	233561200	233561400	bin786894	H3K9me3_true
chr1	234668200	234668400	bin791370	H3K9me3_true
chr1	236161200	236161400	bin797105	H3K9me3_true
chr1	237429200	237429400	bin802200	H3K9me3_true
chr1	237465600	237465800	bin802374	H3K9me3_true
chr1	237516800	237517000	bin802592	H3K9me3_true
chr1	237618600	237618800	bin802988	H3K9me3_true
chr1	237962600	237962800	bin804449	H3K9me3_true
chr1	238110800	238111000	bin805006	H3K9me3_true
chr1	238726800	238727000	bin807527	H3K9me3_true
chr1	239138800	239139000	bin809162	H3K9me3_true
chr1	239226600	239226800	bin809549	H3K9me3_true
chr1	239227000	239227200	bin809551	H3K9me3_true
chr1	239456600	239456800	bin810580	H3K9me3_true
chr1	239484600	239484800	bin810706	H3K9me3_true
chr1	239600200	239600400	bin811196	H3K9me3_true
chr1	239645000	239645200	bin811339	H3K9me3_true
chr1	239921400	239921600	bin812606	H3K9me3_true
chr1	240254400	240254600	bin813946	H3K9me3_true
chr1	240274600	240274800	bin814018	H3K9me3_true
chr1	240906000	240906200	bin816623	H3K9me3_true
chr1	240977800	240978000	bin816927	H3K9me3_true
chr1	241050200	241050400	bin817225	H3K9me3_true
chr1	241182000	241182200	bin817790	H3K9me3_true
chr1	241265000	241265200	bin818149	H3K9me3_true
chr1	241268200	241268400	bin818163	H3K9me3_true
chr1	242375200	242375400	bin822045	H3K9me3_true
chr1	242577000	242577200	bin822898	H3K9me3_true
chr1	242584400	242584600	bin822934	H3K9me3_true
chr1	242712600	242712800	bin823379	H3K9me3_true
chr1	242714800	242715000	bin823385	H3K9me3_true
chr1	242764000	242764200	bin823600	H3K9me3_true
chr1	243581200	243581400	bin825569	H3K9me3_true
chr1	243666800	243667000	bin825866	H3K9me3_true
chr1	244575200	244575400	bin829574	H3K9me3_true
chr1	245641800	245642000	bin833774	H3K9me3_true
chr1	245642200	245642400	bin833776	H3K9me3_true
chr1	245642600	245642800	bin833778	H3K9me3_true
chr1	246517400	246517600	bin837244	H3K9me3_true
chr1	246696600	246696800	bin837851	H3K9me3_true
chr1	247033800	247034000	bin839013	H3K9me3_true
chr1	247034800	247035000	bin839018	H3K9me3_true
chr1	247038000	247038200	bin839031	H3K9me3_true
chr1	247039400	247039600	bin839037	H3K9me3_true
chr1	247042200	247042400	bin839051	H3K9me3_true
chr1	247045200	247045400	bin839060	H3K9me3_true
chr1	247046600	247046800	bin839063	H3K9me3_true
chr1	247054200	247054400	bin839065	H3K9me3_true
chr1	247062000	247062200	bin839084	H3K9me3_true
chr1	247062800	247063000	bin839088	H3K9me3_true
chr1	247064000	247064200	bin839093	H3K9me3_true
chr1	247065000	247065200	bin839097	H3K9me3_true
chr1	247066000	247066200	bin839102	H3K9me3_true
chr1	247138400	247138600	bin839266	H3K9me3_true
chr1	247141600	247141800	bin839269	H3K9me3_true
chr1	247144000	247144200	bin839281	H3K9me3_true
chr1	247157800	247158000	bin839338	H3K9me3_true
chr1	247160200	247160400	bin839346	H3K9me3_true
chr1	247183600	247183800	bin839413	H3K9me3_true
chr1	247184200	247184400	bin839415	H3K9me3_true
chr1	247184800	247185000	bin839417	H3K9me3_true
chr1	247588800	247589000	bin840716	H3K9me3_true
chr1	247614800	247615000	bin840792	H3K9me3_true
chr1	247629000	247629200	bin840842	H3K9me3_true
chr1	247672200	247672400	bin840994	H3K9me3_true
chr1	247672400	247672600	bin840995	H3K9me3_true
chr1	247697200	247697400	bin841077	H3K9me3_true
chr1	247699000	247699200	bin841085	H3K9me3_true
chr1	247738800	247739000	bin841235	H3K9me3_true
chr1	247749600	247749800	bin841287	H3K9me3_true
chr1	247749800	247750000	bin841288	H3K9me3_true
chr1	247750400	247750600	bin841291	H3K9me3_true
chr1	247789400	247789600	bin841419	H3K9me3_true
chr1	248063600	248063800	bin842182	H3K9me3_true
chr1	248214200	248214400	bin842365	H3K9me3_true
chr1	248216600	248216800	bin842371	H3K9me3_true
chr1	248239000	248239200	bin842428	H3K9me3_true
chr1	248349200	248349400	bin842593	H3K9me3_true
chr2	336400	336600	bin844997	H3K9me3_true
chr2	4047000	4047200	bin860266	H3K9me3_true
chr2	4305600	4305800	bin861290	H3K9me3_true
chr2	4378000	4378200	bin861563	H3K9me3_true
chr2	4679600	4679800	bin862809	H3K9me3_true
chr2	4924200	4924400	bin863873	H3K9me3_true
chr2	5024200	5024400	bin864282	H3K9me3_true
chr2	5133200	5133400	bin864752	H3K9me3_true
chr2	5133400	5133600	bin864753	H3K9me3_true
chr2	5235400	5235600	bin865179	H3K9me3_true
chr2	5289200	5289400	bin865393	H3K9me3_true
chr2	5456600	5456800	bin866169	H3K9me3_true
chr2	5666800	5667000	bin866942	H3K9me3_true
chr2	5773400	5773600	bin867446	H3K9me3_true
chr2	5852800	5853000	bin867816	H3K9me3_true
chr2	6085200	6085400	bin868820	H3K9me3_true
chr2	6505600	6505800	bin870579	H3K9me3_true
chr2	6558000	6558200	bin870813	H3K9me3_true
chr2	9066800	9067000	bin881863	H3K9me3_true
chr2	11847600	11847800	bin893444	H3K9me3_true
chr2	11848800	11849000	bin893449	H3K9me3_true
chr2	11857600	11857800	bin893486	H3K9me3_true
chr2	11891000	11891200	bin893609	H3K9me3_true
chr2	12022200	12022400	bin894174	H3K9me3_true
chr2	13357000	13357200	bin899962	H3K9me3_true
chr2	13895000	13895200	bin901622	H3K9me3_true
chr2	13895200	13895400	bin901623	H3K9me3_true
chr2	14746000	14746200	bin905161	H3K9me3_true
chr2	14746600	14746800	bin905164	H3K9me3_true
chr2	14747200	14747400	bin905165	H3K9me3_true
chr2	14747400	14747600	bin905166	H3K9me3_true
chr2	18062400	18062600	bin919037	H3K9me3_true
chr2	18826000	18826200	bin922224	H3K9me3_true
chr2	18861400	18861600	bin922376	H3K9me3_true
chr2	18909800	18910000	bin922565	H3K9me3_true
chr2	19073600	19073800	bin923248	H3K9me3_true
chr2	19439800	19440000	bin924742	H3K9me3_true
chr2	22151600	22151800	bin936221	H3K9me3_true
chr2	22151800	22152000	bin936222	H3K9me3_true
chr2	22152000	22152200	bin936223	H3K9me3_true
chr2	22206800	22207000	bin936410	H3K9me3_true
chr2	22317600	22317800	bin936873	H3K9me3_true
chr2	22690200	22690400	bin938537	H3K9me3_true
chr2	22703400	22703600	bin938602	H3K9me3_true
chr2	35292800	35293000	bin988822	H3K9me3_true
chr2	35529600	35529800	bin989730	H3K9me3_true
chr2	40305200	40305400	bin1008692	H3K9me3_true
chr2	43021400	43021600	bin1019779	H3K9me3_true
chr2	47499200	47499400	bin1038470	H3K9me3_true
chr2	49060400	49060600	bin1044435	H3K9me3_true
chr2	49490800	49491000	bin1046054	H3K9me3_true
chr2	51165800	51166000	bin1053547	H3K9me3_true
chr2	52326800	52327000	bin1058003	H3K9me3_true
chr2	52471000	52471200	bin1058574	H3K9me3_true
chr2	52681000	52681200	bin1059332	H3K9me3_true
chr2	52875800	52876000	bin1060124	H3K9me3_true
chr2	52883200	52883400	bin1060161	H3K9me3_true
chr2	53077600	53077800	bin1060929	H3K9me3_true
chr2	56464000	56464200	bin1074407	H3K9me3_true
chr2	56875600	56875800	bin1075951	H3K9me3_true
chr2	58745800	58746000	bin1083267	H3K9me3_true
chr2	59378400	59378600	bin1086073	H3K9me3_true
chr2	62275000	62275200	bin1097297	H3K9me3_true
chr2	63271000	63271200	bin1100892	H3K9me3_true
chr2	68448200	68448400	bin1121995	H3K9me3_true
chr2	77609600	77609800	bin1157787	H3K9me3_true
chr2	77642600	77642800	bin1157868	H3K9me3_true
chr2	77642800	77643000	bin1157869	H3K9me3_true
chr2	82403400	82403600	bin1176978	H3K9me3_true
chr2	85962000	85962200	bin1190816	H3K9me3_true
chr2	86014600	86014800	bin1191006	H3K9me3_true
chr2	103733600	103733800	bin1227378	H3K9me3_true
chr2	103735000	103735200	bin1227382	H3K9me3_true
chr2	104180600	104180800	bin1229360	H3K9me3_true
chr2	113000000	113000200	bin1257714	H3K9me3_true
chr2	116456000	116456200	bin1270031	H3K9me3_true
chr2	116484600	116484800	bin1270152	H3K9me3_true
chr2	117109000	117109200	bin1272383	H3K9me3_true
chr2	117308800	117309000	bin1273035	H3K9me3_true
chr2	117571800	117572000	bin1273944	H3K9me3_true
chr2	122990200	122990400	bin1296175	H3K9me3_true
chr2	123005600	123005800	bin1296244	H3K9me3_true
chr2	123839800	123840000	bin1299445	H3K9me3_true
chr2	124883800	124884000	bin1303796	H3K9me3_true
chr2	127376400	127376600	bin1313522	H3K9me3_true
chr2	128468200	128468400	bin1317594	H3K9me3_true
chr2	128469000	128469200	bin1317598	H3K9me3_true
chr2	128469400	128469600	bin1317600	H3K9me3_true
chr2	128470000	128470200	bin1317603	H3K9me3_true
chr2	128470200	128470400	bin1317604	H3K9me3_true
chr2	135800600	135800800	bin1339502	H3K9me3_true
chr2	139031000	139031200	bin1352361	H3K9me3_true
chr2	139076600	139076800	bin1352582	H3K9me3_true
chr2	139454600	139454800	bin1354128	H3K9me3_true
chr2	141376000	141376200	bin1362216	H3K9me3_true
chr2	142400600	142400800	bin1366771	H3K9me3_true
chr2	142401000	142401200	bin1366773	H3K9me3_true
chr2	144312400	144312600	bin1374943	H3K9me3_true
chr2	146465400	146465600	bin1384424	H3K9me3_true
chr2	146947600	146947800	bin1386370	H3K9me3_true
chr2	149718000	149718200	bin1397650	H3K9me3_true
chr2	149796600	149796800	bin1397975	H3K9me3_true
chr2	149885600	149885800	bin1398293	H3K9me3_true
chr2	149885800	149886000	bin1398294	H3K9me3_true
chr2	149936600	149936800	bin1398511	H3K9me3_true
chr2	149952000	149952200	bin1398554	H3K9me3_true
chr2	149964200	149964400	bin1398587	H3K9me3_true
chr2	150035200	150035400	bin1398851	H3K9me3_true
chr2	150332000	150332200	bin1400034	H3K9me3_true
chr2	150369800	150370000	bin1400200	H3K9me3_true
chr2	150521400	150521600	bin1400852	H3K9me3_true
chr2	150522000	150522200	bin1400855	H3K9me3_true
chr2	150532400	150532600	bin1400892	H3K9me3_true
chr2	150595400	150595600	bin1401155	H3K9me3_true
chr2	150677000	150677200	bin1401507	H3K9me3_true
chr2	150864000	150864200	bin1402274	H3K9me3_true
chr2	150898200	150898400	bin1402421	H3K9me3_true
chr2	150985600	150985800	bin1402760	H3K9me3_true
chr2	150986400	150986600	bin1402764	H3K9me3_true
chr2	150986600	150986800	bin1402765	H3K9me3_true
chr2	152813000	152813200	bin1410101	H3K9me3_true
chr2	153032600	153032800	bin1410879	H3K9me3_true
chr2	153195200	153195400	bin1411466	H3K9me3_true
chr2	153347200	153347400	bin1411898	H3K9me3_true
chr2	153575400	153575600	bin1412709	H3K9me3_true
chr2	153666200	153666400	bin1413029	H3K9me3_true
chr2	153771800	153772000	bin1413331	H3K9me3_true
chr2	153786800	153787000	bin1413391	H3K9me3_true
chr2	153818200	153818400	bin1413516	H3K9me3_true
chr2	153819000	153819200	bin1413520	H3K9me3_true
chr2	153819400	153819600	bin1413522	H3K9me3_true
chr2	153913000	153913200	bin1413875	H3K9me3_true
chr2	153913400	153913600	bin1413877	H3K9me3_true
chr2	153968000	153968200	bin1414080	H3K9me3_true
chr2	154104000	154104200	bin1414606	H3K9me3_true
chr2	154214800	154215000	bin1415044	H3K9me3_true
chr2	154886400	154886600	bin1417924	H3K9me3_true
chr2	154886600	154886800	bin1417925	H3K9me3_true
chr2	154886800	154887000	bin1417926	H3K9me3_true
chr2	154908800	154909000	bin1418003	H3K9me3_true
chr2	155099800	155100000	bin1418770	H3K9me3_true
chr2	155266600	155266800	bin1419464	H3K9me3_true
chr2	155357200	155357400	bin1419768	H3K9me3_true
chr2	155357400	155357600	bin1419769	H3K9me3_true
chr2	155584000	155584200	bin1420627	H3K9me3_true
chr2	155600400	155600600	bin1420692	H3K9me3_true
chr2	155601000	155601200	bin1420694	H3K9me3_true
chr2	155601200	155601400	bin1420695	H3K9me3_true
chr2	155742600	155742800	bin1421352	H3K9me3_true
chr2	155815600	155815800	bin1421613	H3K9me3_true
chr2	158328000	158328200	bin1431344	H3K9me3_true
chr2	160569400	160569600	bin1440423	H3K9me3_true
chr2	160584000	160584200	bin1440489	H3K9me3_true
chr2	160585400	160585600	bin1440496	H3K9me3_true
chr2	160585800	160586000	bin1440498	H3K9me3_true
chr2	160607800	160608000	bin1440590	H3K9me3_true
chr2	160608000	160608200	bin1440591	H3K9me3_true
chr2	160611000	160611200	bin1440606	H3K9me3_true
chr2	160776800	160777000	bin1441235	H3K9me3_true
chr2	160777000	160777200	bin1441236	H3K9me3_true
chr2	160827600	160827800	bin1441367	H3K9me3_true
chr2	161651000	161651200	bin1444536	H3K9me3_true
chr2	162787800	162788000	bin1449483	H3K9me3_true
chr2	162944800	162945000	bin1450122	H3K9me3_true
chr2	163079000	163079200	bin1450618	H3K9me3_true
chr2	163274600	163274800	bin1451460	H3K9me3_true
chr2	163517000	163517200	bin1452512	H3K9me3_true
chr2	164540000	164540200	bin1456896	H3K9me3_true
chr2	165074200	165074400	bin1459081	H3K9me3_true
chr2	165427200	165427400	bin1460622	H3K9me3_true
chr2	165465800	165466000	bin1460774	H3K9me3_true
chr2	165617800	165618000	bin1461433	H3K9me3_true
chr2	166761600	166761800	bin1466042	H3K9me3_true
chr2	167040800	167041000	bin1467118	H3K9me3_true
chr2	167099800	167100000	bin1467309	H3K9me3_true
chr2	167331800	167332000	bin1468301	H3K9me3_true
chr2	167332600	167332800	bin1468305	H3K9me3_true
chr2	167379600	167379800	bin1468498	H3K9me3_true
chr2	170119800	170120000	bin1479505	H3K9me3_true
chr2	170619400	170619600	bin1481464	H3K9me3_true
chr2	170917000	170917200	bin1482656	H3K9me3_true
chr2	172200600	172200800	bin1487389	H3K9me3_true
chr2	173297600	173297800	bin1491964	H3K9me3_true
chr2	173299000	173299200	bin1491965	H3K9me3_true
chr2	173301000	173301200	bin1491969	H3K9me3_true
chr2	179571800	179572000	bin1517752	H3K9me3_true
chr2	179774200	179774400	bin1518633	H3K9me3_true
chr2	180360200	180360400	bin1520918	H3K9me3_true
chr2	180443400	180443600	bin1521230	H3K9me3_true
chr2	180494200	180494400	bin1521448	H3K9me3_true
chr2	180520400	180520600	bin1521550	H3K9me3_true
chr2	180883400	180883600	bin1522957	H3K9me3_true
chr2	180883600	180883800	bin1522958	H3K9me3_true
chr2	181208200	181208400	bin1524385	H3K9me3_true
chr2	181208400	181208600	bin1524386	H3K9me3_true
chr2	181208600	181208800	bin1524387	H3K9me3_true
chr2	181239600	181239800	bin1524507	H3K9me3_true
chr2	182316000	182316200	bin1529044	H3K9me3_true
chr2	183404800	183405000	bin1533200	H3K9me3_true
chr2	183692000	183692200	bin1534240	H3K9me3_true
chr2	183803800	183804000	bin1534613	H3K9me3_true
chr2	183804200	183804400	bin1534615	H3K9me3_true
chr2	183935200	183935400	bin1534998	H3K9me3_true
chr2	183937400	183937600	bin1535009	H3K9me3_true
chr2	183993600	183993800	bin1535205	H3K9me3_true
chr2	184681800	184682000	bin1537972	H3K9me3_true
chr2	184685800	184686000	bin1537986	H3K9me3_true
chr2	184860000	184860200	bin1538669	H3K9me3_true
chr2	184860800	184861000	bin1538673	H3K9me3_true
chr2	184861000	184861200	bin1538674	H3K9me3_true
chr2	185095200	185095400	bin1539559	H3K9me3_true
chr2	185210200	185210400	bin1540007	H3K9me3_true
chr2	185299800	185300000	bin1540371	H3K9me3_true
chr2	185332200	185332400	bin1540512	H3K9me3_true
chr2	185337400	185337600	bin1540522	H3K9me3_true
chr2	185431200	185431400	bin1540845	H3K9me3_true
chr2	185473000	185473200	bin1540994	H3K9me3_true
chr2	185474000	185474200	bin1540998	H3K9me3_true
chr2	185583600	185583800	bin1541428	H3K9me3_true
chr2	185618800	185619000	bin1541512	H3K9me3_true
chr2	185676200	185676400	bin1541759	H3K9me3_true
chr2	185771200	185771400	bin1542115	H3K9me3_true
chr2	185876200	185876400	bin1542512	H3K9me3_true
chr2	186078000	186078200	bin1543310	H3K9me3_true
chr2	186164400	186164600	bin1543609	H3K9me3_true
chr2	187023200	187023400	bin1546690	H3K9me3_true
chr2	193101600	193101800	bin1571268	H3K9me3_true
chr2	194254200	194254400	bin1575794	H3K9me3_true
chr2	210285200	210285400	bin1638672	H3K9me3_true
chr2	211105400	211105600	bin1641882	H3K9me3_true
chr2	211322000	211322200	bin1642774	H3K9me3_true
chr2	226092200	226092400	bin1704285	H3K9me3_true
chr2	228289400	228289600	bin1713278	H3K9me3_true
chr2	229050600	229050800	bin1716306	H3K9me3_true
chr2	231409600	231409800	bin1725313	H3K9me3_true
chr2	231410200	231410400	bin1725316	H3K9me3_true
chr2	237129600	237129800	bin1748374	H3K9me3_true
chr2	237131200	237131400	bin1748382	H3K9me3_true
chr2	239918000	239918200	bin1760325	H3K9me3_true
chr2	240525200	240525400	bin1762934	H3K9me3_true
chr2	240525600	240525800	bin1762936	H3K9me3_true
chr3	81800	82000	bin1769170	H3K9me3_true
chr3	622200	622400	bin1771321	H3K9me3_true
chr3	808600	808800	bin1772087	H3K9me3_true
chr3	827000	827200	bin1772112	H3K9me3_true
chr3	1187800	1188000	bin1773550	H3K9me3_true
chr3	1218000	1218200	bin1773693	H3K9me3_true
chr3	1218200	1218400	bin1773694	H3K9me3_true
chr3	1756800	1757000	bin1775896	H3K9me3_true
chr3	1757200	1757400	bin1775898	H3K9me3_true
chr3	1940000	1940200	bin1776566	H3K9me3_true
chr3	2132200	2132400	bin1777375	H3K9me3_true
chr3	2137800	2138000	bin1777402	H3K9me3_true
chr3	2603800	2604000	bin1779387	H3K9me3_true
chr3	2721600	2721800	bin1779887	H3K9me3_true
chr3	3317200	3317400	bin1782503	H3K9me3_true
chr3	3354400	3354600	bin1782657	H3K9me3_true
chr3	3366600	3366800	bin1782716	H3K9me3_true
chr3	3400800	3401000	bin1782852	H3K9me3_true
chr3	3401000	3401200	bin1782853	H3K9me3_true
chr3	3489600	3489800	bin1783198	H3K9me3_true
chr3	3577200	3577400	bin1783578	H3K9me3_true
chr3	3666400	3666600	bin1783972	H3K9me3_true
chr3	3880800	3881000	bin1784830	H3K9me3_true
chr3	6988200	6988400	bin1796933	H3K9me3_true
chr3	7024400	7024600	bin1797089	H3K9me3_true
chr3	7034600	7034800	bin1797136	H3K9me3_true
chr3	7111000	7111200	bin1797472	H3K9me3_true
chr3	7165200	7165400	bin1797726	H3K9me3_true
chr3	7253800	7254000	bin1798140	H3K9me3_true
chr3	7263600	7263800	bin1798170	H3K9me3_true
chr3	7263800	7264000	bin1798171	H3K9me3_true
chr3	7452000	7452200	bin1799009	H3K9me3_true
chr3	7511400	7511600	bin1799293	H3K9me3_true
chr3	7579800	7580000	bin1799557	H3K9me3_true
chr3	7594400	7594600	bin1799629	H3K9me3_true
chr3	7822800	7823000	bin1800685	H3K9me3_true
chr3	7823400	7823600	bin1800688	H3K9me3_true
chr3	7823600	7823800	bin1800689	H3K9me3_true
chr3	7897600	7897800	bin1800959	H3K9me3_true
chr3	9619600	9619800	bin1807876	H3K9me3_true
chr3	13178400	13178600	bin1821937	H3K9me3_true
chr3	13814200	13814400	bin1824579	H3K9me3_true
chr3	13814600	13814800	bin1824581	H3K9me3_true
chr3	13815200	13815400	bin1824584	H3K9me3_true
chr3	13815400	13815600	bin1824585	H3K9me3_true
chr3	13816200	13816400	bin1824589	H3K9me3_true
chr3	18337000	18337200	bin1841990	H3K9me3_true
chr3	18600600	18600800	bin1843209	H3K9me3_true
chr3	18668200	18668400	bin1843491	H3K9me3_true
chr3	18703800	18704000	bin1843626	H3K9me3_true
chr3	18891800	18892000	bin1844482	H3K9me3_true
chr3	18998200	18998400	bin1844806	H3K9me3_true
chr3	19062600	19062800	bin1845052	H3K9me3_true
chr3	19252800	19253000	bin1845814	H3K9me3_true
chr3	19571800	19572000	bin1847004	H3K9me3_true
chr3	19623000	19623200	bin1847136	H3K9me3_true
chr3	20482200	20482400	bin1850029	H3K9me3_true
chr3	21105800	21106000	bin1852199	H3K9me3_true
chr3	21116400	21116600	bin1852221	H3K9me3_true
chr3	21203000	21203200	bin1852517	H3K9me3_true
chr3	21203200	21203400	bin1852518	H3K9me3_true
chr3	21331800	21332000	bin1852951	H3K9me3_true
chr3	21705800	21706000	bin1854472	H3K9me3_true
chr3	21938200	21938400	bin1855479	H3K9me3_true
chr3	21938400	21938600	bin1855480	H3K9me3_true
chr3	21995600	21995800	bin1855671	H3K9me3_true
chr3	21996000	21996200	bin1855673	H3K9me3_true
chr3	22033000	22033200	bin1855783	H3K9me3_true
chr3	22228400	22228600	bin1856551	H3K9me3_true
chr3	22462200	22462400	bin1857540	H3K9me3_true
chr3	22627800	22628000	bin1858200	H3K9me3_true
chr3	22628000	22628200	bin1858201	H3K9me3_true
chr3	22676000	22676200	bin1858317	H3K9me3_true
chr3	23083200	23083400	bin1859839	H3K9me3_true
chr3	25127000	25127200	bin1868479	H3K9me3_true
chr3	26340400	26340600	bin1873285	H3K9me3_true
chr3	26596000	26596200	bin1874232	H3K9me3_true
chr3	26827600	26827800	bin1875163	H3K9me3_true
chr3	27058000	27058200	bin1875951	H3K9me3_true
chr3	27224200	27224400	bin1876662	H3K9me3_true
chr3	27244600	27244800	bin1876716	H3K9me3_true
chr3	27333600	27333800	bin1877069	H3K9me3_true
chr3	28538600	28538800	bin1881695	H3K9me3_true
chr3	28772000	28772200	bin1882664	H3K9me3_true
chr3	28908200	28908400	bin1883249	H3K9me3_true
chr3	28970400	28970600	bin1883499	H3K9me3_true
chr3	28970600	28970800	bin1883500	H3K9me3_true
chr3	29098800	29099000	bin1883949	H3K9me3_true
chr3	29453600	29453800	bin1885533	H3K9me3_true
chr3	30816800	30817000	bin1891242	H3K9me3_true
chr3	31102600	31102800	bin1892486	H3K9me3_true
chr3	31648400	31648600	bin1894807	H3K9me3_true
chr3	31648600	31648800	bin1894808	H3K9me3_true
chr3	34395800	34396000	bin1904978	H3K9me3_true
chr3	34544200	34544400	bin1905473	H3K9me3_true
chr3	34557800	34558000	bin1905540	H3K9me3_true
chr3	34592800	34593000	bin1905674	H3K9me3_true
chr3	34794000	34794200	bin1906345	H3K9me3_true
chr3	34824800	34825000	bin1906455	H3K9me3_true
chr3	34930800	34931000	bin1906901	H3K9me3_true
chr3	35057400	35057600	bin1907413	H3K9me3_true
chr3	35178800	35179000	bin1907810	H3K9me3_true
chr3	35394000	35394200	bin1908677	H3K9me3_true
chr3	35557600	35557800	bin1909334	H3K9me3_true
chr3	35953600	35953800	bin1911012	H3K9me3_true
chr3	36149600	36149800	bin1911647	H3K9me3_true
chr3	36266200	36266400	bin1912094	H3K9me3_true
chr3	36303400	36303600	bin1912266	H3K9me3_true
chr3	36320200	36320400	bin1912346	H3K9me3_true
chr3	36389800	36390000	bin1912594	H3K9me3_true
chr3	36492800	36493000	bin1913019	H3K9me3_true
chr3	36555200	36555400	bin1913280	H3K9me3_true
chr3	36945400	36945600	bin1914855	H3K9me3_true
chr3	36945800	36946000	bin1914857	H3K9me3_true
chr3	39298400	39298600	bin1924394	H3K9me3_true
chr3	40488000	40488200	bin1928712	H3K9me3_true
chr3	43338400	43338600	bin1939541	H3K9me3_true
chr3	43354600	43354800	bin1939619	H3K9me3_true
chr3	44490800	44491000	bin1944105	H3K9me3_true
chr3	44501400	44501600	bin1944141	H3K9me3_true
chr3	44673800	44674000	bin1944740	H3K9me3_true
chr3	44720400	44720600	bin1944872	H3K9me3_true
chr3	44720600	44720800	bin1944873	H3K9me3_true
chr3	44720800	44721000	bin1944874	H3K9me3_true
chr3	44721200	44721400	bin1944876	H3K9me3_true
chr3	44722600	44722800	bin1944879	H3K9me3_true
chr3	44723000	44723200	bin1944881	H3K9me3_true
chr3	44723200	44723400	bin1944882	H3K9me3_true
chr3	44728200	44728400	bin1944904	H3K9me3_true
chr3	44731600	44731800	bin1944921	H3K9me3_true
chr3	78268400	78268600	bin2077659	H3K9me3_true
chr3	120040600	120040800	bin2226259	H3K9me3_true
chr3	128859400	128859600	bin2259767	H3K9me3_true
chr3	137542600	137542800	bin2292278	H3K9me3_true
chr3	146694800	146695000	bin2328056	H3K9me3_true
chr3	146811200	146811400	bin2328472	H3K9me3_true
chr3	152539400	152539600	bin2351531	H3K9me3_true
chr3	152785800	152786000	bin2352469	H3K9me3_true
chr3	153769000	153769200	bin2356198	H3K9me3_true
chr3	159178400	159178600	bin2377133	H3K9me3_true
chr3	159331800	159332000	bin2377827	H3K9me3_true
chr3	159456000	159456200	bin2378279	H3K9me3_true
chr3	159526800	159527000	bin2378552	H3K9me3_true
chr3	159601000	159601200	bin2378833	H3K9me3_true
chr3	162276600	162276800	bin2389249	H3K9me3_true
chr3	163073200	163073400	bin2392172	H3K9me3_true
chr3	164193200	164193400	bin2396088	H3K9me3_true
chr3	166864800	166865000	bin2406201	H3K9me3_true
chr3	168730000	168730200	bin2413543	H3K9me3_true
chr3	175941400	175941600	bin2443164	H3K9me3_true
chr3	175989200	175989400	bin2443338	H3K9me3_true
chr3	178699200	178699400	bin2454109	H3K9me3_true
chr3	180469200	180469400	bin2460650	H3K9me3_true
chr3	183655000	183655200	bin2473041	H3K9me3_true
chr3	189194600	189194800	bin2495355	H3K9me3_true
chr3	189744000	189744200	bin2497678	H3K9me3_true
chr3	191703800	191704000	bin2505640	H3K9me3_true
chr3	191801600	191801800	bin2505961	H3K9me3_true
chr3	191804400	191804600	bin2505973	H3K9me3_true
chr3	192044400	192044600	bin2506896	H3K9me3_true
chr3	192384800	192385000	bin2508313	H3K9me3_true
chr3	192687600	192687800	bin2509645	H3K9me3_true
chr3	193771400	193771600	bin2513983	H3K9me3_true
chr4	101600	101800	bin2529577	H3K9me3_true
chr4	4726000	4726200	bin2545280	H3K9me3_true
chr4	8335000	8335200	bin2560623	H3K9me3_true
chr4	10964000	10964200	bin2567951	H3K9me3_true
chr4	10964200	10964400	bin2567952	H3K9me3_true
chr4	11988600	11988800	bin2572173	H3K9me3_true
chr4	12162400	12162600	bin2572827	H3K9me3_true
chr4	12524800	12525000	bin2574176	H3K9me3_true
chr4	14346400	14346600	bin2581688	H3K9me3_true
chr4	18842600	18842800	bin2599882	H3K9me3_true
chr4	30406800	30407000	bin2647474	H3K9me3_true
chr4	33607000	33607200	bin2660773	H3K9me3_true
chr4	34663200	34663400	bin2664569	H3K9me3_true
chr4	35079000	35079200	bin2666279	H3K9me3_true
chr4	35182400	35182600	bin2666667	H3K9me3_true
chr4	35710200	35710400	bin2668713	H3K9me3_true
chr4	35712800	35713000	bin2668722	H3K9me3_true
chr4	38298200	38298400	bin2679027	H3K9me3_true
chr4	38298600	38298800	bin2679029	H3K9me3_true
chr4	66285400	66285600	bin2775002	H3K9me3_true
chr4	66348600	66348800	bin2775274	H3K9me3_true
chr4	70120400	70120600	bin2786295	H3K9me3_true
chr4	74253800	74254000	bin2801456	H3K9me3_true
chr4	77552800	77553000	bin2813844	H3K9me3_true
chr4	79340800	79341000	bin2820953	H3K9me3_true
chr4	83621000	83621200	bin2837212	H3K9me3_true
chr4	83621200	83621400	bin2837213	H3K9me3_true
chr4	89541800	89542000	bin2860086	H3K9me3_true
chr4	91433600	91433800	bin2867510	H3K9me3_true
chr4	91519200	91519400	bin2867801	H3K9me3_true
chr4	100223800	100224000	bin2901143	H3K9me3_true
chr4	100443800	100444000	bin2901989	H3K9me3_true
chr4	100444000	100444200	bin2901990	H3K9me3_true
chr4	100444600	100444800	bin2901993	H3K9me3_true
chr4	100935200	100935400	bin2903863	H3K9me3_true
chr4	104248800	104249000	bin2915710	H3K9me3_true
chr4	104249000	104249200	bin2915711	H3K9me3_true
chr4	104352200	104352400	bin2916075	H3K9me3_true
chr4	104605800	104606000	bin2917129	H3K9me3_true
chr4	106892600	106892800	bin2925659	H3K9me3_true
chr4	111350200	111350400	bin2943001	H3K9me3_true
chr4	115023800	115024000	bin2957779	H3K9me3_true
chr4	115131200	115131400	bin2958266	H3K9me3_true
chr4	116015800	116016000	bin2961645	H3K9me3_true
chr4	116477800	116478000	bin2963423	H3K9me3_true
chr4	116553200	116553400	bin2963744	H3K9me3_true
chr4	117128200	117128400	bin2966055	H3K9me3_true
chr4	117429200	117429400	bin2967216	H3K9me3_true
chr4	117850000	117850200	bin2968758	H3K9me3_true
chr4	120865400	120865600	bin2979147	H3K9me3_true
chr4	122490400	122490600	bin2985555	H3K9me3_true
chr4	125065600	125065800	bin2995608	H3K9me3_true
chr4	129475400	129475600	bin3012452	H3K9me3_true
chr4	130223600	130223800	bin3015456	H3K9me3_true
chr4	130223800	130224000	bin3015457	H3K9me3_true
chr4	130403000	130403200	bin3016208	H3K9me3_true
chr4	130646200	130646400	bin3017110	H3K9me3_true
chr4	130756000	130756200	bin3017527	H3K9me3_true
chr4	132838600	132838800	bin3024296	H3K9me3_true
chr4	133069200	133069400	bin3025109	H3K9me3_true
chr4	134687800	134688000	bin3031475	H3K9me3_true
chr4	134688000	134688200	bin3031476	H3K9me3_true
chr4	136811800	136812000	bin3039804	H3K9me3_true
chr4	142599000	142599200	bin3062809	H3K9me3_true
chr4	149712200	149712400	bin3089020	H3K9me3_true
chr4	154937000	154937200	bin3110009	H3K9me3_true
chr4	157049600	157049800	bin3118772	H3K9me3_true
chr4	158951200	158951400	bin3126265	H3K9me3_true
chr4	164452000	164452200	bin3147933	H3K9me3_true
chr4	167195000	167195200	bin3158244	H3K9me3_true
chr4	167195400	167195600	bin3158246	H3K9me3_true
chr4	167195600	167195800	bin3158247	H3K9me3_true
chr4	167509000	167509200	bin3159439	H3K9me3_true
chr4	170374800	170375000	bin3170061	H3K9me3_true
chr4	172454600	172454800	bin3178437	H3K9me3_true
chr4	175095000	175095200	bin3189057	H3K9me3_true
chr4	176508800	176509000	bin3194794	H3K9me3_true
chr4	180215800	180216000	bin3210272	H3K9me3_true
chr4	183378800	183379000	bin3223940	H3K9me3_true
chr4	184614800	184615000	bin3228903	H3K9me3_true
chr4	186720600	186720800	bin3237681	H3K9me3_true
chr4	187763200	187763400	bin3242031	H3K9me3_true
chr4	188915600	188915800	bin3246378	H3K9me3_true
chr5	1457000	1457200	bin3253991	H3K9me3_true
chr5	1457600	1457800	bin3253994	H3K9me3_true
chr5	1458600	1458800	bin3253999	H3K9me3_true
chr5	3373400	3373600	bin3262156	H3K9me3_true
chr5	3484200	3484400	bin3262615	H3K9me3_true
chr5	4119400	4119600	bin3265361	H3K9me3_true
chr5	4155000	4155200	bin3265504	H3K9me3_true
chr5	4356800	4357000	bin3266436	H3K9me3_true
chr5	4596400	4596600	bin3267453	H3K9me3_true
chr5	4658600	4658800	bin3267695	H3K9me3_true
chr5	8529400	8529600	bin3283861	H3K9me3_true
chr5	8793400	8793600	bin3284939	H3K9me3_true
chr5	12081400	12081600	bin3298655	H3K9me3_true
chr5	12131800	12132000	bin3298851	H3K9me3_true
chr5	12132200	12132400	bin3298853	H3K9me3_true
chr5	12299600	12299800	bin3299489	H3K9me3_true
chr5	12320400	12320600	bin3299575	H3K9me3_true
chr5	12349200	12349400	bin3299675	H3K9me3_true
chr5	12384000	12384200	bin3299823	H3K9me3_true
chr5	12467800	12468000	bin3300148	H3K9me3_true
chr5	12468000	12468200	bin3300149	H3K9me3_true
chr5	12938200	12938400	bin3301956	H3K9me3_true
chr5	13381800	13382000	bin3303728	H3K9me3_true
chr5	13598400	13598600	bin3304597	H3K9me3_true
chr5	13695800	13696000	bin3304982	H3K9me3_true
chr5	15861400	15861600	bin3313945	H3K9me3_true
chr5	16079000	16079200	bin3314859	H3K9me3_true
chr5	17931600	17931800	bin3321561	H3K9me3_true
chr5	19687600	19687800	bin3328359	H3K9me3_true
chr5	19688000	19688200	bin3328361	H3K9me3_true
chr5	20648000	20648200	bin3332202	H3K9me3_true
chr5	22038000	22038200	bin3335485	H3K9me3_true
chr5	23492600	23492800	bin3341081	H3K9me3_true
chr5	24762600	24762800	bin3345776	H3K9me3_true
chr5	24823800	24824000	bin3346048	H3K9me3_true
chr5	25357600	25357800	bin3348080	H3K9me3_true
chr5	25738800	25739000	bin3349486	H3K9me3_true
chr5	25796800	25797000	bin3349720	H3K9me3_true
chr5	27963800	27964000	bin3358148	H3K9me3_true
chr5	28083200	28083400	bin3358580	H3K9me3_true
chr5	28442800	28443000	bin3360034	H3K9me3_true
chr5	29499000	29499200	bin3363983	H3K9me3_true
chr5	30457000	30457200	bin3367638	H3K9me3_true
chr5	30748400	30748600	bin3368766	H3K9me3_true
chr5	33050200	33050400	bin3377743	H3K9me3_true
chr5	33104800	33105000	bin3377902	H3K9me3_true
chr5	33105200	33105400	bin3377904	H3K9me3_true
chr5	33111600	33111800	bin3377912	H3K9me3_true
chr5	37280400	37280600	bin3392717	H3K9me3_true
chr5	37280600	37280800	bin3392718	H3K9me3_true
chr5	40165200	40165400	bin3404069	H3K9me3_true
chr5	42131800	42132000	bin3411334	H3K9me3_true
chr5	44171200	44171400	bin3418011	H3K9me3_true
chr5	44679400	44679600	bin3420000	H3K9me3_true
chr5	44679600	44679800	bin3420001	H3K9me3_true
chr5	45839600	45839800	bin3424503	H3K9me3_true
chr5	62861600	62861800	bin3473654	H3K9me3_true
chr5	63889000	63889200	bin3477575	H3K9me3_true
chr5	87536400	87536600	bin3562683	H3K9me3_true
chr5	91803200	91803400	bin3579758	H3K9me3_true
chr5	91844000	91844200	bin3579932	H3K9me3_true
chr5	92953400	92953600	bin3584484	H3K9me3_true
chr5	97686000	97686200	bin3603434	H3K9me3_true
chr5	98227400	98227600	bin3605316	H3K9me3_true
chr5	101607800	101608000	bin3616670	H3K9me3_true
chr5	102078200	102078400	bin3618456	H3K9me3_true
chr5	102090800	102091000	bin3618487	H3K9me3_true
chr5	102451200	102451400	bin3619627	H3K9me3_true
chr5	105760600	105760800	bin3632990	H3K9me3_true
chr5	105885200	105885400	bin3633490	H3K9me3_true
chr5	110219200	110219400	bin3651204	H3K9me3_true
chr5	110227800	110228000	bin3651246	H3K9me3_true
chr5	110470000	110470200	bin3652173	H3K9me3_true
chr5	110558200	110558400	bin3652472	H3K9me3_true
chr5	110558400	110558600	bin3652473	H3K9me3_true
chr5	110825000	110825200	bin3653403	H3K9me3_true
chr5	114829600	114829800	bin3668795	H3K9me3_true
chr5	114937800	114938000	bin3668972	H3K9me3_true
chr5	120431800	120432000	bin3690296	H3K9me3_true
chr5	120960600	120960800	bin3692395	H3K9me3_true
chr5	121317400	121317600	bin3693770	H3K9me3_true
chr5	123772200	123772400	bin3703452	H3K9me3_true
chr5	125770200	125770400	bin3711397	H3K9me3_true
chr5	126080000	126080200	bin3712605	H3K9me3_true
chr5	129270200	129270400	bin3724839	H3K9me3_true
chr5	129323000	129323200	bin3724956	H3K9me3_true
chr5	129323200	129323400	bin3724957	H3K9me3_true
chr5	130007800	130008000	bin3727700	H3K9me3_true
chr5	130425400	130425600	bin3729363	H3K9me3_true
chr5	130479400	130479600	bin3729513	H3K9me3_true
chr5	130487800	130488000	bin3729550	H3K9me3_true
chr5	130590000	130590200	bin3729846	H3K9me3_true
chr5	131844600	131844800	bin3734023	H3K9me3_true
chr5	131866200	131866400	bin3734067	H3K9me3_true
chr5	132130000	132130200	bin3735030	H3K9me3_true
chr5	132130400	132130600	bin3735031	H3K9me3_true
chr5	132157600	132157800	bin3735092	H3K9me3_true
chr5	145142800	145143000	bin3786865	H3K9me3_true
chr5	145177800	145178000	bin3787008	H3K9me3_true
chr5	147752400	147752600	bin3797328	H3K9me3_true
chr5	149775200	149775400	bin3805687	H3K9me3_true
chr5	150928000	150928200	bin3810513	H3K9me3_true
chr5	151366400	151366600	bin3812264	H3K9me3_true
chr5	152288600	152288800	bin3815944	H3K9me3_true
chr5	152874000	152874200	bin3818183	H3K9me3_true
chr5	155333200	155333400	bin3827915	H3K9me3_true
chr5	155473200	155473400	bin3828466	H3K9me3_true
chr5	156432600	156432800	bin3832470	H3K9me3_true
chr5	156486800	156487000	bin3832725	H3K9me3_true
chr5	156612600	156612800	bin3833185	H3K9me3_true
chr5	156755400	156755600	bin3833772	H3K9me3_true
chr5	162300200	162300400	bin3856062	H3K9me3_true
chr5	162950200	162950400	bin3858480	H3K9me3_true
chr5	162964200	162964400	bin3858544	H3K9me3_true
chr5	163830000	163830200	bin3861809	H3K9me3_true
chr5	165287000	165287200	bin3867997	H3K9me3_true
chr5	166127800	166128000	bin3871511	H3K9me3_true
chr5	166681800	166682000	bin3873893	H3K9me3_true
chr5	167229400	167229600	bin3876268	H3K9me3_true
chr5	170974600	170974800	bin3892637	H3K9me3_true
chr5	171121800	171122000	bin3893065	H3K9me3_true
chr5	171123000	171123200	bin3893071	H3K9me3_true
chr5	172748200	172748400	bin3899655	H3K9me3_true
chr5	173592000	173592200	bin3903129	H3K9me3_true
chr5	173593000	173593200	bin3903133	H3K9me3_true
chr5	173593200	173593400	bin3903134	H3K9me3_true
chr5	173593400	173593600	bin3903135	H3K9me3_true
chr5	176585200	176585400	bin3913974	H3K9me3_true
chr5	176585600	176585800	bin3913976	H3K9me3_true
chr5	178507200	178507400	bin3920026	H3K9me3_true
chr5	178876000	178876200	bin3921239	H3K9me3_true
chr5	178932800	178933000	bin3921439	H3K9me3_true
chr5	178964600	178964800	bin3921580	H3K9me3_true
chr5	178967200	178967400	bin3921589	H3K9me3_true
chr6	2482000	2482200	bin3939782	H3K9me3_true
chr6	4979200	4979400	bin3949850	H3K9me3_true
chr6	6691600	6691800	bin3956553	H3K9me3_true
chr6	6951800	6952000	bin3957677	H3K9me3_true
chr6	8581000	8581200	bin3964336	H3K9me3_true
chr6	8693600	8693800	bin3964757	H3K9me3_true
chr6	8733800	8734000	bin3964941	H3K9me3_true
chr6	8819000	8819200	bin3965289	H3K9me3_true
chr6	8860800	8861000	bin3965483	H3K9me3_true
chr6	8869000	8869200	bin3965523	H3K9me3_true
chr6	8905000	8905200	bin3965688	H3K9me3_true
chr6	9042400	9042600	bin3966269	H3K9me3_true
chr6	9065400	9065600	bin3966375	H3K9me3_true
chr6	9375600	9375800	bin3967701	H3K9me3_true
chr6	9554000	9554200	bin3968476	H3K9me3_true
chr6	9721200	9721400	bin3969186	H3K9me3_true
chr6	9851200	9851400	bin3969727	H3K9me3_true
chr6	9851400	9851600	bin3969728	H3K9me3_true
chr6	9851800	9852000	bin3969730	H3K9me3_true
chr6	9852000	9852200	bin3969731	H3K9me3_true
chr6	9895800	9896000	bin3969852	H3K9me3_true
chr6	10411200	10411400	bin3971972	H3K9me3_true
chr6	11881200	11881400	bin3977794	H3K9me3_true
chr6	11881400	11881600	bin3977795	H3K9me3_true
chr6	11912200	11912400	bin3977900	H3K9me3_true
chr6	11914400	11914600	bin3977910	H3K9me3_true
chr6	13286800	13287000	bin3983828	H3K9me3_true
chr6	13287200	13287400	bin3983830	H3K9me3_true
chr6	14169400	14169600	bin3987487	H3K9me3_true
chr6	14486800	14487000	bin3988858	H3K9me3_true
chr6	14808000	14808200	bin3990314	H3K9me3_true
chr6	15938000	15938200	bin3994752	H3K9me3_true
chr6	16038400	16038600	bin3995154	H3K9me3_true
chr6	16217400	16217600	bin3995922	H3K9me3_true
chr6	17577800	17578000	bin4001255	H3K9me3_true
chr6	18091000	18091200	bin4003188	H3K9me3_true
chr6	18823800	18824000	bin4006106	H3K9me3_true
chr6	18963400	18963600	bin4006665	H3K9me3_true
chr6	18963800	18964000	bin4006667	H3K9me3_true
chr6	19115000	19115200	bin4007262	H3K9me3_true
chr6	19115200	19115400	bin4007263	H3K9me3_true
chr6	19269800	19270000	bin4007809	H3K9me3_true
chr6	19470200	19470400	bin4008606	H3K9me3_true
chr6	19614600	19614800	bin4009106	H3K9me3_true
chr6	19615200	19615400	bin4009109	H3K9me3_true
chr6	22834600	22834800	bin4022236	H3K9me3_true
chr6	23564000	23564200	bin4025138	H3K9me3_true
chr6	23572800	23573000	bin4025181	H3K9me3_true
chr6	23775400	23775600	bin4026061	H3K9me3_true
chr6	27312200	27312400	bin4038655	H3K9me3_true
chr6	27359000	27359200	bin4038834	H3K9me3_true
chr6	27369000	27369200	bin4038871	H3K9me3_true
chr6	27398400	27398600	bin4038969	H3K9me3_true
chr6	27399200	27399400	bin4038972	H3K9me3_true
chr6	28188000	28188200	bin4041979	H3K9me3_true
chr6	28188600	28188800	bin4041982	H3K9me3_true
chr6	28188800	28189000	bin4041983	H3K9me3_true
chr6	28189000	28189200	bin4041984	H3K9me3_true
chr6	28189200	28189400	bin4041985	H3K9me3_true
chr6	28326400	28326600	bin4042509	H3K9me3_true
chr6	28327200	28327400	bin4042513	H3K9me3_true
chr6	28327400	28327600	bin4042514	H3K9me3_true
chr6	28329000	28329200	bin4042517	H3K9me3_true
chr6	28634800	28635000	bin4043726	H3K9me3_true
chr6	28635400	28635600	bin4043729	H3K9me3_true
chr6	28968800	28969000	bin4044687	H3K9me3_true
chr6	30181400	30181600	bin4048278	H3K9me3_true
chr6	30303000	30303200	bin4048656	H3K9me3_true
chr6	35747400	35747600	bin4067515	H3K9me3_true
chr6	35748600	35748800	bin4067521	H3K9me3_true
chr6	47916000	47916200	bin4117557	H3K9me3_true
chr6	48343400	48343600	bin4119315	H3K9me3_true
chr6	48537000	48537200	bin4119995	H3K9me3_true
chr6	48686600	48686800	bin4120627	H3K9me3_true
chr6	48687200	48687400	bin4120630	H3K9me3_true
chr6	48845000	48845200	bin4121207	H3K9me3_true
chr6	48937000	48937200	bin4121523	H3K9me3_true
chr6	50259800	50260000	bin4126484	H3K9me3_true
chr6	50260200	50260400	bin4126486	H3K9me3_true
chr6	50260400	50260600	bin4126487	H3K9me3_true
chr6	50472600	50472800	bin4127364	H3K9me3_true
chr6	50499200	50499400	bin4127450	H3K9me3_true
chr6	50500000	50500200	bin4127454	H3K9me3_true
chr6	51717600	51717800	bin4132521	H3K9me3_true
chr6	66396600	66396800	bin4173407	H3K9me3_true
chr6	72543400	72543600	bin4197366	H3K9me3_true
chr6	74466200	74466400	bin4204098	H3K9me3_true
chr6	74504400	74504600	bin4204203	H3K9me3_true
chr6	77892400	77892600	bin4216473	H3K9me3_true
chr6	77984800	77985000	bin4216769	H3K9me3_true
chr6	80622600	80622800	bin4226441	H3K9me3_true
chr6	85988000	85988200	bin4245712	H3K9me3_true
chr6	86275800	86276000	bin4246451	H3K9me3_true
chr6	86307800	86308000	bin4246524	H3K9me3_true
chr6	86308000	86308200	bin4246525	H3K9me3_true
chr6	92577800	92578000	bin4271006	H3K9me3_true
chr6	92891000	92891200	bin4272135	H3K9me3_true
chr6	92891200	92891400	bin4272136	H3K9me3_true
chr6	93037200	93037400	bin4272679	H3K9me3_true
chr6	93716000	93716200	bin4275576	H3K9me3_true
chr6	96003000	96003200	bin4284498	H3K9me3_true
chr6	101961600	101961800	bin4308651	H3K9me3_true
chr6	104017800	104018000	bin4316380	H3K9me3_true
chr6	104018400	104018600	bin4316383	H3K9me3_true
chr6	106861200	106861400	bin4327638	H3K9me3_true
chr6	115132200	115132400	bin4360057	H3K9me3_true
chr6	115540600	115540800	bin4361462	H3K9me3_true
chr6	115704000	115704200	bin4362083	H3K9me3_true
chr6	115780600	115780800	bin4362366	H3K9me3_true
chr6	117063200	117063400	bin4367626	H3K9me3_true
chr6	117161000	117161200	bin4367909	H3K9me3_true
chr6	120188000	120188200	bin4379566	H3K9me3_true
chr6	120229800	120230000	bin4379704	H3K9me3_true
chr6	120779400	120779600	bin4381748	H3K9me3_true
chr6	121912000	121912200	bin4385874	H3K9me3_true
chr6	124416600	124416800	bin4396027	H3K9me3_true
chr6	132209600	132209800	bin4428090	H3K9me3_true
chr6	132210200	132210400	bin4428092	H3K9me3_true
chr6	137133600	137133800	bin4448497	H3K9me3_true
chr6	137185200	137185400	bin4448652	H3K9me3_true
chr6	141017000	141017200	bin4464086	H3K9me3_true
chr6	141074800	141075000	bin4464316	H3K9me3_true
chr6	141247200	141247400	bin4464915	H3K9me3_true
chr6	141288600	141288800	bin4465097	H3K9me3_true
chr6	141288800	141289000	bin4465098	H3K9me3_true
chr6	141403000	141403200	bin4465543	H3K9me3_true
chr6	141668000	141668200	bin4466572	H3K9me3_true
chr6	141886600	141886800	bin4467348	H3K9me3_true
chr6	141954800	141955000	bin4467561	H3K9me3_true
chr6	145325800	145326000	bin4481162	H3K9me3_true
chr6	145326000	145326200	bin4481163	H3K9me3_true
chr6	145338200	145338400	bin4481221	H3K9me3_true
chr6	145378800	145379000	bin4481402	H3K9me3_true
chr6	145394400	145394600	bin4481473	H3K9me3_true
chr6	145409800	145410000	bin4481542	H3K9me3_true
chr6	145502400	145502600	bin4481842	H3K9me3_true
chr6	145507600	145507800	bin4481858	H3K9me3_true
chr6	145583800	145584000	bin4482110	H3K9me3_true
chr6	145584000	145584200	bin4482111	H3K9me3_true
chr6	146112000	146112200	bin4484200	H3K9me3_true
chr6	150297600	150297800	bin4500764	H3K9me3_true
chr6	150298000	150298200	bin4500766	H3K9me3_true
chr6	151909600	151909800	bin4507121	H3K9me3_true
chr6	152423800	152424000	bin4509287	H3K9me3_true
chr6	152529400	152529600	bin4509748	H3K9me3_true
chr6	153182200	153182400	bin4512379	H3K9me3_true
chr6	153344600	153344800	bin4513085	H3K9me3_true
chr6	153653800	153654000	bin4514131	H3K9me3_true
chr6	153735000	153735200	bin4514433	H3K9me3_true
chr6	153736400	153736600	bin4514438	H3K9me3_true
chr6	153759800	153760000	bin4514538	H3K9me3_true
chr6	153761000	153761200	bin4514542	H3K9me3_true
chr6	153832600	153832800	bin4514822	H3K9me3_true
chr6	153861400	153861600	bin4514942	H3K9me3_true
chr6	153861800	153862000	bin4514944	H3K9me3_true
chr6	153883000	153883200	bin4515010	H3K9me3_true
chr6	153977000	153977200	bin4515315	H3K9me3_true
chr6	154011000	154011200	bin4515429	H3K9me3_true
chr6	154031400	154031600	bin4515479	H3K9me3_true
chr6	155353400	155353600	bin4520870	H3K9me3_true
chr6	155949200	155949400	bin4523401	H3K9me3_true
chr6	156048200	156048400	bin4523815	H3K9me3_true
chr6	156213400	156213600	bin4524503	H3K9me3_true
chr6	156213600	156213800	bin4524504	H3K9me3_true
chr6	156214000	156214200	bin4524506	H3K9me3_true
chr6	156243800	156244000	bin4524611	H3K9me3_true
chr6	162056200	162056400	bin4547051	H3K9me3_true
chr6	162153200	162153400	bin4547475	H3K9me3_true
chr6	162377600	162377800	bin4548494	H3K9me3_true
chr6	162668600	162668800	bin4549749	H3K9me3_true
chr6	162785800	162786000	bin4550275	H3K9me3_true
chr6	162792800	162793000	bin4550308	H3K9me3_true
chr6	162875000	162875200	bin4550663	H3K9me3_true
chr6	162943400	162943600	bin4550921	H3K9me3_true
chr6	163012800	163013000	bin4551162	H3K9me3_true
chr6	163021000	163021200	bin4551195	H3K9me3_true
chr6	163022200	163022400	bin4551201	H3K9me3_true
chr6	164369200	164369400	bin4557162	H3K9me3_true
chr6	164510000	164510200	bin4557765	H3K9me3_true
chr6	164733600	164733800	bin4558634	H3K9me3_true
chr6	164805200	164805400	bin4558913	H3K9me3_true
chr6	164805400	164805600	bin4558914	H3K9me3_true
chr6	164811000	164811200	bin4558919	H3K9me3_true
chr6	164918600	164918800	bin4559358	H3K9me3_true
chr6	164941400	164941600	bin4559444	H3K9me3_true
chr6	165009000	165009200	bin4559695	H3K9me3_true
chr6	165013200	165013400	bin4559715	H3K9me3_true
chr6	165096400	165096600	bin4560041	H3K9me3_true
chr6	165102800	165103000	bin4560053	H3K9me3_true
chr6	165118000	165118200	bin4560106	H3K9me3_true
chr6	165161400	165161600	bin4560283	H3K9me3_true
chr6	165161800	165162000	bin4560285	H3K9me3_true
chr6	165168000	165168200	bin4560303	H3K9me3_true
chr6	165227800	165228000	bin4560550	H3K9me3_true
chr6	165250000	165250200	bin4560636	H3K9me3_true
chr6	165252000	165252200	bin4560646	H3K9me3_true
chr6	165323600	165323800	bin4560924	H3K9me3_true
chr6	165552600	165552800	bin4561813	H3K9me3_true
chr6	167120200	167120400	bin4568423	H3K9me3_true
chr6	168012600	168012800	bin4571527	H3K9me3_true
chr6	170003200	170003400	bin4579581	H3K9me3_true
chr6	170003400	170003600	bin4579582	H3K9me3_true
chr6	170161000	170161200	bin4580254	H3K9me3_true
chr6	170467800	170468000	bin4581521	H3K9me3_true
chr6	170468600	170468800	bin4581525	H3K9me3_true
chr7	397000	397200	bin4583468	H3K9me3_true
chr7	6677800	6678000	bin4605919	H3K9me3_true
chr7	7066200	7066400	bin4606191	H3K9me3_true
chr7	7066600	7066800	bin4606193	H3K9me3_true
chr7	7071600	7071800	bin4606200	H3K9me3_true
chr7	9364600	9364800	bin4615575	H3K9me3_true
chr7	9388800	9389000	bin4615646	H3K9me3_true
chr7	9778400	9778600	bin4617049	H3K9me3_true
chr7	9954800	9955000	bin4617706	H3K9me3_true
chr7	11546200	11546400	bin4623899	H3K9me3_true
chr7	11673800	11674000	bin4624444	H3K9me3_true
chr7	11674000	11674200	bin4624445	H3K9me3_true
chr7	11950000	11950200	bin4625546	H3K9me3_true
chr7	15278000	15278200	bin4639090	H3K9me3_true
chr7	15278200	15278400	bin4639091	H3K9me3_true
chr7	15278400	15278600	bin4639092	H3K9me3_true
chr7	15278600	15278800	bin4639093	H3K9me3_true
chr7	15768200	15768400	bin4641218	H3K9me3_true
chr7	16106400	16106600	bin4642589	H3K9me3_true
chr7	16144800	16145000	bin4642758	H3K9me3_true
chr7	16384000	16384200	bin4643701	H3K9me3_true
chr7	18636200	18636400	bin4653129	H3K9me3_true
chr7	19022200	19022400	bin4654824	H3K9me3_true
chr7	19457600	19457800	bin4656506	H3K9me3_true
chr7	19480400	19480600	bin4656595	H3K9me3_true
chr7	22646400	22646600	bin4669225	H3K9me3_true
chr7	22646600	22646800	bin4669226	H3K9me3_true
chr7	22647200	22647400	bin4669229	H3K9me3_true
chr7	26265400	26265600	bin4683304	H3K9me3_true
chr7	30717400	30717600	bin4701536	H3K9me3_true
chr7	31867400	31867600	bin4706520	H3K9me3_true
chr7	34356200	34356400	bin4715478	H3K9me3_true
chr7	34471400	34471600	bin4715888	H3K9me3_true
chr7	41369600	41369800	bin4741629	H3K9me3_true
chr7	44182800	44183000	bin4752719	H3K9me3_true
chr7	46260800	46261000	bin4760155	H3K9me3_true
chr7	46862800	46863000	bin4762531	H3K9me3_true
chr7	49438200	49438400	bin4772871	H3K9me3_true
chr7	49438400	49438600	bin4772872	H3K9me3_true
chr7	49438600	49438800	bin4772873	H3K9me3_true
chr7	49667600	49667800	bin4773760	H3K9me3_true
chr7	52687000	52687200	bin4785938	H3K9me3_true
chr7	56542000	56542200	bin4798407	H3K9me3_true
chr7	65429600	65429800	bin4800359	H3K9me3_true
chr7	65429800	65430000	bin4800360	H3K9me3_true
chr7	65430200	65430400	bin4800362	H3K9me3_true
chr7	66265600	66265800	bin4801111	H3K9me3_true
chr7	73641400	73641600	bin4822058	H3K9me3_true
chr7	78699000	78699200	bin4834164	H3K9me3_true
chr7	78761600	78761800	bin4834460	H3K9me3_true
chr7	79017000	79017200	bin4835507	H3K9me3_true
chr7	79353800	79354000	bin4836798	H3K9me3_true
chr7	79648200	79648400	bin4838074	H3K9me3_true
chr7	80129000	80129200	bin4839919	H3K9me3_true
chr7	80528600	80528800	bin4841648	H3K9me3_true
chr7	81659400	81659600	bin4846273	H3K9me3_true
chr7	81659600	81659800	bin4846274	H3K9me3_true
chr7	81903000	81903200	bin4847311	H3K9me3_true
chr7	81903200	81903400	bin4847312	H3K9me3_true
chr7	82620800	82621000	bin4850439	H3K9me3_true
chr7	84260400	84260600	bin4857379	H3K9me3_true
chr7	85502600	85502800	bin4862591	H3K9me3_true
chr7	86002800	86003000	bin4864511	H3K9me3_true
chr7	86058400	86058600	bin4864720	H3K9me3_true
chr7	86058600	86058800	bin4864721	H3K9me3_true
chr7	86058800	86059000	bin4864722	H3K9me3_true
chr7	86207800	86208000	bin4865253	H3K9me3_true
chr7	87207800	87208000	bin4869368	H3K9me3_true
chr7	87674000	87674200	bin4870994	H3K9me3_true
chr7	87674200	87674400	bin4870995	H3K9me3_true
chr7	87674400	87674600	bin4870996	H3K9me3_true
chr7	87674800	87675000	bin4870998	H3K9me3_true
chr7	88991400	88991600	bin4876055	H3K9me3_true
chr7	89041200	89041400	bin4876252	H3K9me3_true
chr7	89354200	89354400	bin4877503	H3K9me3_true
chr7	89354400	89354600	bin4877504	H3K9me3_true
chr7	89439200	89439400	bin4877850	H3K9me3_true
chr7	89636600	89636800	bin4878544	H3K9me3_true
chr7	89761000	89761200	bin4879017	H3K9me3_true
chr7	89798400	89798600	bin4879113	H3K9me3_true
chr7	92940000	92940200	bin4890951	H3K9me3_true
chr7	94794400	94794600	bin4898586	H3K9me3_true
chr7	94834400	94834600	bin4898679	H3K9me3_true
chr7	94860600	94860800	bin4898766	H3K9me3_true
chr7	98098000	98098200	bin4910447	H3K9me3_true
chr7	105713200	105713400	bin4935077	H3K9me3_true
chr7	105713600	105713800	bin4935079	H3K9me3_true
chr7	106343400	106343600	bin4937641	H3K9me3_true
chr7	106417200	106417400	bin4937957	H3K9me3_true
chr7	108210800	108211000	bin4944988	H3K9me3_true
chr7	108863600	108863800	bin4947548	H3K9me3_true
chr7	109034200	109034400	bin4948133	H3K9me3_true
chr7	109111200	109111400	bin4948425	H3K9me3_true
chr7	109133200	109133400	bin4948523	H3K9me3_true
chr7	109142600	109142800	bin4948531	H3K9me3_true
chr7	109179600	109179800	bin4948679	H3K9me3_true
chr7	109212800	109213000	bin4948814	H3K9me3_true
chr7	109213200	109213400	bin4948815	H3K9me3_true
chr7	109247000	109247200	bin4948953	H3K9me3_true
chr7	109271400	109271600	bin4949059	H3K9me3_true
chr7	109309600	109309800	bin4949205	H3K9me3_true
chr7	109310200	109310400	bin4949208	H3K9me3_true
chr7	109388000	109388200	bin4949491	H3K9me3_true
chr7	109456200	109456400	bin4949735	H3K9me3_true
chr7	109760200	109760400	bin4950920	H3K9me3_true
chr7	109760400	109760600	bin4950921	H3K9me3_true
chr7	109760800	109761000	bin4950923	H3K9me3_true
chr7	109761000	109761200	bin4950924	H3K9me3_true
chr7	109761200	109761400	bin4950925	H3K9me3_true
chr7	109781800	109782000	bin4950982	H3K9me3_true
chr7	109945400	109945600	bin4951567	H3K9me3_true
chr7	109959800	109960000	bin4951625	H3K9me3_true
chr7	110137000	110137200	bin4952259	H3K9me3_true
chr7	110204600	110204800	bin4952504	H3K9me3_true
chr7	113269200	113269400	bin4964843	H3K9me3_true
chr7	113529800	113530000	bin4965824	H3K9me3_true
chr7	113552800	113553000	bin4965900	H3K9me3_true
chr7	113788800	113789000	bin4966750	H3K9me3_true
chr7	113955200	113955400	bin4967394	H3K9me3_true
chr7	113955400	113955600	bin4967395	H3K9me3_true
chr7	113989000	113989200	bin4967528	H3K9me3_true
chr7	113989200	113989400	bin4967529	H3K9me3_true
chr7	113989400	113989600	bin4967530	H3K9me3_true
chr7	114186800	114187000	bin4968315	H3K9me3_true
chr7	114791800	114792000	bin4970944	H3K9me3_true
chr7	115174400	115174600	bin4972580	H3K9me3_true
chr7	115277400	115277600	bin4973020	H3K9me3_true
chr7	115297800	115298000	bin4973107	H3K9me3_true
chr7	115332400	115332600	bin4973261	H3K9me3_true
chr7	115845400	115845600	bin4975549	H3K9me3_true
chr7	118286200	118286400	bin4985818	H3K9me3_true
chr7	118501000	118501200	bin4986658	H3K9me3_true
chr7	118609200	118609400	bin4987074	H3K9me3_true
chr7	118609400	118609600	bin4987075	H3K9me3_true
chr7	118950800	118951000	bin4988548	H3K9me3_true
chr7	118958400	118958600	bin4988554	H3K9me3_true
chr7	119021200	119021400	bin4988839	H3K9me3_true
chr7	119038000	119038200	bin4988910	H3K9me3_true
chr7	119168200	119168400	bin4989373	H3K9me3_true
chr7	119168400	119168600	bin4989374	H3K9me3_true
chr7	119168800	119169000	bin4989376	H3K9me3_true
chr7	119169000	119169200	bin4989377	H3K9me3_true
chr7	119169200	119169400	bin4989378	H3K9me3_true
chr7	119219000	119219200	bin4989536	H3K9me3_true
chr7	119219200	119219400	bin4989537	H3K9me3_true
chr7	119219800	119220000	bin4989540	H3K9me3_true
chr7	119228000	119228200	bin4989574	H3K9me3_true
chr7	119304000	119304200	bin4989878	H3K9me3_true
chr7	119421000	119421200	bin4990321	H3K9me3_true
chr7	121676600	121676800	bin4999405	H3K9me3_true
chr7	121692400	121692600	bin4999472	H3K9me3_true
chr7	121694400	121694600	bin4999482	H3K9me3_true
chr7	121756200	121756400	bin4999696	H3K9me3_true
chr7	121812600	121812800	bin4999932	H3K9me3_true
chr7	121845000	121845200	bin5000059	H3K9me3_true
chr7	122451000	122451200	bin5002630	H3K9me3_true
chr7	122807200	122807400	bin5004130	H3K9me3_true
chr7	122932200	122932400	bin5004634	H3K9me3_true
chr7	123068200	123068400	bin5005142	H3K9me3_true
chr7	123068400	123068600	bin5005143	H3K9me3_true
chr7	123198600	123198800	bin5005686	H3K9me3_true
chr7	123320600	123320800	bin5006153	H3K9me3_true
chr7	123320800	123321000	bin5006154	H3K9me3_true
chr7	123322000	123322200	bin5006158	H3K9me3_true
chr7	123322200	123322400	bin5006159	H3K9me3_true
chr7	123330600	123330800	bin5006198	H3K9me3_true
chr7	124021200	124021400	bin5008853	H3K9me3_true
chr7	124108000	124108200	bin5009208	H3K9me3_true
chr7	124161200	124161400	bin5009384	H3K9me3_true
chr7	124161400	124161600	bin5009385	H3K9me3_true
chr7	124161800	124162000	bin5009387	H3K9me3_true
chr7	124162000	124162200	bin5009388	H3K9me3_true
chr7	124202800	124203000	bin5009533	H3K9me3_true
chr7	124286000	124286200	bin5009833	H3K9me3_true
chr7	124360200	124360400	bin5010086	H3K9me3_true
chr7	124525200	124525400	bin5010735	H3K9me3_true
chr7	124590800	124591000	bin5011012	H3K9me3_true
chr7	124680800	124681000	bin5011357	H3K9me3_true
chr7	124681200	124681400	bin5011359	H3K9me3_true
chr7	124709000	124709200	bin5011446	H3K9me3_true
chr7	125717200	125717400	bin5015343	H3K9me3_true
chr7	125832600	125832800	bin5015855	H3K9me3_true
chr7	125851400	125851600	bin5015927	H3K9me3_true
chr7	126052600	126052800	bin5016684	H3K9me3_true
chr7	126119400	126119600	bin5016945	H3K9me3_true
chr7	126253800	126254000	bin5017441	H3K9me3_true
chr7	126301400	126301600	bin5017596	H3K9me3_true
chr7	126333400	126333600	bin5017716	H3K9me3_true
chr7	126510800	126511000	bin5018475	H3K9me3_true
chr7	126859000	126859200	bin5019902	H3K9me3_true
chr7	126868200	126868400	bin5019943	H3K9me3_true
chr7	130376000	130376200	bin5032925	H3K9me3_true
chr7	130855800	130856000	bin5034756	H3K9me3_true
chr7	130856000	130856200	bin5034757	H3K9me3_true
chr7	130856200	130856400	bin5034758	H3K9me3_true
chr7	131885000	131885200	bin5038969	H3K9me3_true
chr7	134464200	134464400	bin5050289	H3K9me3_true
chr7	136458400	136458600	bin5058151	H3K9me3_true
chr7	136505400	136505600	bin5058342	H3K9me3_true
chr7	136924600	136924800	bin5059814	H3K9me3_true
chr7	136960000	136960200	bin5059976	H3K9me3_true
chr7	136987600	136987800	bin5060072	H3K9me3_true
chr7	137015200	137015400	bin5060200	H3K9me3_true
chr7	137078800	137079000	bin5060479	H3K9me3_true
chr7	137093800	137094000	bin5060550	H3K9me3_true
chr7	137363600	137363800	bin5061574	H3K9me3_true
chr7	137363800	137364000	bin5061575	H3K9me3_true
chr7	137396000	137396200	bin5061730	H3K9me3_true
chr7	137396200	137396400	bin5061731	H3K9me3_true
chr7	137396400	137396600	bin5061732	H3K9me3_true
chr7	137492400	137492600	bin5062157	H3K9me3_true
chr7	137493000	137493200	bin5062160	H3K9me3_true
chr7	138345800	138346000	bin5065398	H3K9me3_true
chr7	138346000	138346200	bin5065399	H3K9me3_true
chr7	138346200	138346400	bin5065400	H3K9me3_true
chr7	138346400	138346600	bin5065401	H3K9me3_true
chr7	138346600	138346800	bin5065402	H3K9me3_true
chr7	138347000	138347200	bin5065404	H3K9me3_true
chr7	138347400	138347600	bin5065406	H3K9me3_true
chr7	138371400	138371600	bin5065459	H3K9me3_true
chr7	138371800	138372000	bin5065461	H3K9me3_true
chr7	138429400	138429600	bin5065633	H3K9me3_true
chr7	138429600	138429800	bin5065634	H3K9me3_true
chr7	141845800	141846000	bin5078855	H3K9me3_true
chr7	142034200	142034400	bin5079533	H3K9me3_true
chr7	142161000	142161200	bin5079909	H3K9me3_true
chr7	142182200	142182400	bin5079981	H3K9me3_true
chr7	142196200	142196400	bin5080040	H3K9me3_true
chr7	142247000	142247200	bin5080241	H3K9me3_true
chr7	143421600	143421800	bin5084093	H3K9me3_true
chr7	143422800	143423000	bin5084099	H3K9me3_true
chr7	143471600	143471800	bin5084305	H3K9me3_true
chr7	144147400	144147600	bin5085704	H3K9me3_true
chr7	144565600	144565800	bin5086613	H3K9me3_true
chr7	144621200	144621400	bin5086828	H3K9me3_true
chr7	144677600	144677800	bin5087057	H3K9me3_true
chr7	144976400	144976600	bin5088226	H3K9me3_true
chr7	145001600	145001800	bin5088315	H3K9me3_true
chr7	145002000	145002200	bin5088317	H3K9me3_true
chr7	145006000	145006200	bin5088333	H3K9me3_true
chr7	145051200	145051400	bin5088500	H3K9me3_true
chr7	145055200	145055400	bin5088518	H3K9me3_true
chr7	145123600	145123800	bin5088752	H3K9me3_true
chr7	145134400	145134600	bin5088800	H3K9me3_true
chr7	145219400	145219600	bin5089164	H3K9me3_true
chr7	145266800	145267000	bin5089321	H3K9me3_true
chr7	145273200	145273400	bin5089349	H3K9me3_true
chr7	145288400	145288600	bin5089382	H3K9me3_true
chr7	145330800	145331000	bin5089557	H3K9me3_true
chr7	145339400	145339600	bin5089584	H3K9me3_true
chr7	145386800	145387000	bin5089755	H3K9me3_true
chr7	145422400	145422600	bin5089880	H3K9me3_true
chr7	145432800	145433000	bin5089918	H3K9me3_true
chr7	145462800	145463000	bin5090060	H3K9me3_true
chr7	145463000	145463200	bin5090061	H3K9me3_true
chr7	145557800	145558000	bin5090446	H3K9me3_true
chr7	146458200	146458400	bin5093989	H3K9me3_true
chr7	146506200	146506400	bin5094192	H3K9me3_true
chr7	146793600	146793800	bin5095427	H3K9me3_true
chr7	146904200	146904400	bin5095898	H3K9me3_true
chr7	146976600	146976800	bin5096110	H3K9me3_true
chr7	147000800	147001000	bin5096204	H3K9me3_true
chr7	147117400	147117600	bin5096703	H3K9me3_true
chr7	147435400	147435600	bin5098061	H3K9me3_true
chr7	147491000	147491200	bin5098284	H3K9me3_true
chr7	147567000	147567200	bin5098616	H3K9me3_true
chr7	147569400	147569600	bin5098627	H3K9me3_true
chr7	147597800	147598000	bin5098761	H3K9me3_true
chr7	147708400	147708600	bin5099153	H3K9me3_true
chr7	147763600	147763800	bin5099370	H3K9me3_true
chr7	147787200	147787400	bin5099480	H3K9me3_true
chr7	147811000	147811200	bin5099573	H3K9me3_true
chr7	149529000	149529200	bin5106060	H3K9me3_true
chr7	149529200	149529400	bin5106061	H3K9me3_true
chr7	151319800	151320000	bin5111174	H3K9me3_true
chr7	151320800	151321000	bin5111179	H3K9me3_true
chr7	151420200	151420400	bin5111567	H3K9me3_true
chr7	151420400	151420600	bin5111568	H3K9me3_true
chr7	151420800	151421000	bin5111570	H3K9me3_true
chr7	151421400	151421600	bin5111571	H3K9me3_true
chr7	151421800	151422000	bin5111573	H3K9me3_true
chr7	151422000	151422200	bin5111574	H3K9me3_true
chr7	153843000	153843200	bin5119408	H3K9me3_true
chr7	155183800	155184000	bin5124361	H3K9me3_true
chr7	155186200	155186400	bin5124371	H3K9me3_true
chr7	157117800	157118000	bin5132498	H3K9me3_true
chr7	157939600	157939800	bin5135858	H3K9me3_true
chr7	158313000	158313200	bin5137317	H3K9me3_true
chr7	158595200	158595400	bin5138436	H3K9me3_true
chr7	158981200	158981400	bin5139918	H3K9me3_true
chr7	158981400	158981600	bin5139919	H3K9me3_true
chr7	159270800	159271000	bin5141062	H3K9me3_true
chr7	159326800	159327000	bin5141179	H3K9me3_true
chr8	246000	246200	bin5609769	H3K9me3_true
chr8	1424600	1424800	bin5614005	H3K9me3_true
chr8	2809800	2810000	bin5618933	H3K9me3_true
chr8	3499600	3499800	bin5621886	H3K9me3_true
chr8	3523800	3524000	bin5621993	H3K9me3_true
chr8	3542600	3542800	bin5622071	H3K9me3_true
chr8	5238800	5239000	bin5629709	H3K9me3_true
chr8	5618000	5618200	bin5631388	H3K9me3_true
chr8	5618200	5618400	bin5631389	H3K9me3_true
chr8	8357800	8358000	bin5637566	H3K9me3_true
chr8	8358600	8358800	bin5637568	H3K9me3_true
chr8	13759600	13759800	bin5656980	H3K9me3_true
chr8	16704600	16704800	bin5669395	H3K9me3_true
chr8	24057600	24057800	bin5699719	H3K9me3_true
chr8	24758800	24759000	bin5702685	H3K9me3_true
chr8	31558200	31558400	bin5730236	H3K9me3_true
chr8	35809200	35809400	bin5747606	H3K9me3_true
chr8	39612800	39613000	bin5761945	H3K9me3_true
chr8	43122400	43122600	bin5775445	H3K9me3_true
chr8	51501400	51501600	bin5794372	H3K9me3_true
chr8	62677200	62677400	bin5837930	H3K9me3_true
chr8	64030000	64030200	bin5843122	H3K9me3_true
chr8	64177800	64178000	bin5843638	H3K9me3_true
chr8	64182800	64183000	bin5843657	H3K9me3_true
chr8	68903400	68903600	bin5862172	H3K9me3_true
chr8	70844600	70844800	bin5869461	H3K9me3_true
chr8	70844800	70845000	bin5869462	H3K9me3_true
chr8	71234400	71234600	bin5870956	H3K9me3_true
chr8	74477800	74478000	bin5883507	H3K9me3_true
chr8	75179000	75179200	bin5886289	H3K9me3_true
chr8	77330200	77330400	bin5894968	H3K9me3_true
chr8	77330400	77330600	bin5894969	H3K9me3_true
chr8	82674800	82675000	bin5915860	H3K9me3_true
chr8	82825400	82825600	bin5916496	H3K9me3_true
chr8	82826000	82826200	bin5916498	H3K9me3_true
chr8	82937400	82937600	bin5916982	H3K9me3_true
chr8	83201000	83201200	bin5918029	H3K9me3_true
chr8	84750000	84750200	bin5923941	H3K9me3_true
chr8	86994000	86994200	bin5931866	H3K9me3_true
chr8	87778600	87778800	bin5934790	H3K9me3_true
chr8	89253800	89254000	bin5940483	H3K9me3_true
chr8	90138000	90138200	bin5943753	H3K9me3_true
chr8	90139800	90140000	bin5943762	H3K9me3_true
chr8	102676200	102676400	bin5993560	H3K9me3_true
chr8	102677200	102677400	bin5993565	H3K9me3_true
chr8	103694600	103694800	bin5997553	H3K9me3_true
chr8	105186200	105186400	bin6003666	H3K9me3_true
chr8	109848400	109848600	bin6022717	H3K9me3_true
chr8	109848600	109848800	bin6022718	H3K9me3_true
chr8	110018200	110018400	bin6023327	H3K9me3_true
chr8	111904400	111904600	bin6030815	H3K9me3_true
chr8	111904600	111904800	bin6030816	H3K9me3_true
chr8	112074200	112074400	bin6031490	H3K9me3_true
chr8	113025600	113025800	bin6035531	H3K9me3_true
chr8	113026000	113026200	bin6035533	H3K9me3_true
chr8	113082000	113082200	bin6035779	H3K9me3_true
chr8	113489600	113489800	bin6037542	H3K9me3_true
chr8	114136200	114136400	bin6040062	H3K9me3_true
chr8	114953200	114953400	bin6043188	H3K9me3_true
chr8	115019000	115019200	bin6043423	H3K9me3_true
chr8	119300800	119301000	bin6061737	H3K9me3_true
chr8	119464000	119464200	bin6062320	H3K9me3_true
chr8	120685400	120685600	bin6067215	H3K9me3_true
chr8	120835200	120835400	bin6067887	H3K9me3_true
chr8	120852000	120852200	bin6067968	H3K9me3_true
chr8	121214200	121214400	bin6069414	H3K9me3_true
chr8	121558800	121559000	bin6070861	H3K9me3_true
chr8	121976200	121976400	bin6072572	H3K9me3_true
chr8	122107800	122108000	bin6073075	H3K9me3_true
chr8	124976600	124976800	bin6084685	H3K9me3_true
chr8	124981600	124981800	bin6084708	H3K9me3_true
chr8	128639000	128639200	bin6099898	H3K9me3_true
chr8	129306800	129307000	bin6102577	H3K9me3_true
chr8	131196800	131197000	bin6110328	H3K9me3_true
chr8	131371200	131371400	bin6110919	H3K9me3_true
chr8	131378600	131378800	bin6110943	H3K9me3_true
chr8	131386400	131386600	bin6110978	H3K9me3_true
chr8	134143800	134144000	bin6122911	H3K9me3_true
chr8	136906400	136906600	bin6134673	H3K9me3_true
chr8	137782400	137782600	bin6138269	H3K9me3_true
chr8	137926000	137926200	bin6138845	H3K9me3_true
chr8	139545600	139545800	bin6145808	H3K9me3_true
chr8	142314200	142314400	bin6157923	H3K9me3_true
chr8	142315400	142315600	bin6157929	H3K9me3_true
chr8	142327200	142327400	bin6157982	H3K9me3_true
chr8	142808200	142808400	bin6160054	H3K9me3_true
chr8	143649600	143649800	bin6163240	H3K9me3_true
chr8	143650600	143650800	bin6163245	H3K9me3_true
chr8	143650800	143651000	bin6163246	H3K9me3_true
chr8	143651600	143651800	bin6163250	H3K9me3_true
chr8	143652600	143652800	bin6163255	H3K9me3_true
chr8	143668000	143668200	bin6163304	H3K9me3_true
chr8	143668200	143668400	bin6163305	H3K9me3_true
chr8	144706000	144706200	bin6167352	H3K9me3_true
chr8	144707200	144707400	bin6167358	H3K9me3_true
chr8	144930600	144930800	bin6168089	H3K9me3_true
chr8	144930800	144931000	bin6168090	H3K9me3_true
chr8	144931600	144931800	bin6168093	H3K9me3_true
chr8	144932000	144932200	bin6168095	H3K9me3_true
chr8	144932200	144932400	bin6168096	H3K9me3_true
chr8	144932800	144933000	bin6168099	H3K9me3_true
chr8	144976800	144977000	bin6168205	H3K9me3_true
chr9	35141400	35141600	bin6303631	H3K9me3_true
chr9	91189200	91189400	bin6406661	H3K9me3_true
chr9	92846200	92846400	bin6412755	H3K9me3_true
chr9	96757800	96758000	bin6426873	H3K9me3_true
chr9	96758000	96758200	bin6426874	H3K9me3_true
chr9	96758200	96758400	bin6426875	H3K9me3_true
chr9	96758400	96758600	bin6426876	H3K9me3_true
chr9	96794800	96795000	bin6426995	H3K9me3_true
chr9	96796600	96796800	bin6427001	H3K9me3_true
chr9	96817000	96817200	bin6427041	H3K9me3_true
chr9	98365400	98365600	bin6431748	H3K9me3_true
chr9	100937800	100938000	bin6442223	H3K9me3_true
chr9	100955200	100955400	bin6442284	H3K9me3_true
chr9	103169800	103170000	bin6450880	H3K9me3_true
chr9	103913800	103914000	bin6453785	H3K9me3_true
chr9	106486800	106487000	bin6463714	H3K9me3_true
chr9	106712200	106712400	bin6464608	H3K9me3_true
chr9	110815600	110815800	bin6481713	H3K9me3_true
chr9	110953000	110953200	bin6482305	H3K9me3_true
chr9	110962200	110962400	bin6482319	H3K9me3_true
chr9	111166400	111166600	bin6483172	H3K9me3_true
chr9	111196200	111196400	bin6483289	H3K9me3_true
chr9	111540400	111540600	bin6484553	H3K9me3_true
chr9	115257200	115257400	bin6499716	H3K9me3_true
chr9	115262600	115262800	bin6499741	H3K9me3_true
chr9	116942200	116942400	bin6506819	H3K9me3_true
chr9	116986400	116986600	bin6507028	H3K9me3_true
chr9	117206400	117206600	bin6508007	H3K9me3_true
chr9	117331000	117331200	bin6508584	H3K9me3_true
chr9	117598800	117599000	bin6509803	H3K9me3_true
chr9	118017200	118017400	bin6511682	H3K9me3_true
chr9	118017400	118017600	bin6511683	H3K9me3_true
chr9	118017600	118017800	bin6511684	H3K9me3_true
chr9	118728400	118728600	bin6514699	H3K9me3_true
chr9	119255600	119255800	bin6516914	H3K9me3_true
chr9	119462600	119462800	bin6517872	H3K9me3_true
chr9	119890200	119890400	bin6519714	H3K9me3_true
chr9	126009000	126009200	bin6544679	H3K9me3_true
chr9	129475000	129475200	bin6558107	H3K9me3_true
chr9	130957200	130957400	bin6564051	H3K9me3_true
chr9	130957600	130957800	bin6564053	H3K9me3_true
chr9	130959200	130959400	bin6564059	H3K9me3_true
chr9	134661600	134661800	bin6579214	H3K9me3_true
chr9	136315800	136316000	bin6586214	H3K9me3_true
chr9	137476600	137476800	bin6590962	H3K9me3_true
chr11	514800	515000	bin6594484	H3K9me3_true
chr11	2645400	2645600	bin6603006	H3K9me3_true
chr11	2652600	2652800	bin6603025	H3K9me3_true
chr11	2822200	2822400	bin6603845	H3K9me3_true
chr11	7806000	7806200	bin6621424	H3K9me3_true
chr11	21626200	21626400	bin6676438	H3K9me3_true
chr11	23134600	23134800	bin6682260	H3K9me3_true
chr11	23134800	23135000	bin6682261	H3K9me3_true
chr11	23845800	23846000	bin6684887	H3K9me3_true
chr11	25729000	25729200	bin6692009	H3K9me3_true
chr11	29876200	29876400	bin6708691	H3K9me3_true
chr11	31175400	31175600	bin6714212	H3K9me3_true
chr11	34817800	34818000	bin6728918	H3K9me3_true
chr11	34820400	34820600	bin6728921	H3K9me3_true
chr11	36958400	36958600	bin6737932	H3K9me3_true
chr11	36958600	36958800	bin6737933	H3K9me3_true
chr11	37547200	37547400	bin6740160	H3K9me3_true
chr11	38019600	38019800	bin6742062	H3K9me3_true
chr11	50412200	50412400	bin6782772	H3K9me3_true
chr11	50413000	50413200	bin6782774	H3K9me3_true
chr11	70943400	70943600	bin6837176	H3K9me3_true
chr11	72667600	72667800	bin6841944	H3K9me3_true
chr11	75118600	75118800	bin6851332	H3K9me3_true
chr11	75118800	75119000	bin6851333	H3K9me3_true
chr11	79930200	79930400	bin6870515	H3K9me3_true
chr11	81086000	81086200	bin6874661	H3K9me3_true
chr11	81694000	81694200	bin6877197	H3K9me3_true
chr11	81893600	81893800	bin6877967	H3K9me3_true
chr11	82576800	82577000	bin6880656	H3K9me3_true
chr11	85452400	85452600	bin6892083	H3K9me3_true
chr11	87711600	87711800	bin6900410	H3K9me3_true
chr11	89457000	89457200	bin6905207	H3K9me3_true
chr11	90558000	90558200	bin6907357	H3K9me3_true
chr11	91593200	91593400	bin6911341	H3K9me3_true
chr11	93977000	93977200	bin6920837	H3K9me3_true
chr11	97273800	97274000	bin6933797	H3K9me3_true
chr11	97408800	97409000	bin6934241	H3K9me3_true
chr11	97409000	97409200	bin6934242	H3K9me3_true
chr11	97461400	97461600	bin6934461	H3K9me3_true
chr11	97471400	97471600	bin6934500	H3K9me3_true
chr11	97471600	97471800	bin6934501	H3K9me3_true
chr11	97537600	97537800	bin6934754	H3K9me3_true
chr11	99154200	99154400	bin6940703	H3K9me3_true
chr11	99154800	99155000	bin6940706	H3K9me3_true
chr11	101530000	101530200	bin6949912	H3K9me3_true
chr11	101530400	101530600	bin6949914	H3K9me3_true
chr11	101632600	101632800	bin6950327	H3K9me3_true
chr11	103831000	103831200	bin6958661	H3K9me3_true
chr11	103831400	103831600	bin6958663	H3K9me3_true
chr11	103831800	103832000	bin6958665	H3K9me3_true
chr11	103832000	103832200	bin6958666	H3K9me3_true
chr11	103862200	103862400	bin6958761	H3K9me3_true
chr11	104758000	104758200	bin6962600	H3K9me3_true
chr11	106207000	106207200	bin6968259	H3K9me3_true
chr11	106652600	106652800	bin6970151	H3K9me3_true
chr11	109435800	109436000	bin6980638	H3K9me3_true
chr11	110802400	110802600	bin6985693	H3K9me3_true
chr11	111012600	111012800	bin6986650	H3K9me3_true
chr11	111082600	111082800	bin6986911	H3K9me3_true
chr11	111195000	111195200	bin6987412	H3K9me3_true
chr11	122268400	122268600	bin7033919	H3K9me3_true
chr11	122316600	122316800	bin7034131	H3K9me3_true
chr11	122424000	122424200	bin7034547	H3K9me3_true
chr11	122461800	122462000	bin7034691	H3K9me3_true
chr11	122462000	122462200	bin7034692	H3K9me3_true
chr11	125803000	125803200	bin7047828	H3K9me3_true
chr11	125803400	125803600	bin7047830	H3K9me3_true
chr11	127411200	127411400	bin7054743	H3K9me3_true
chr11	127652800	127653000	bin7055770	H3K9me3_true
chr11	128085800	128086000	bin7057482	H3K9me3_true
chr11	129057000	129057200	bin7061873	H3K9me3_true
chr11	129057200	129057400	bin7061874	H3K9me3_true
chr11	129100200	129100400	bin7062019	H3K9me3_true
chr11	129100400	129100600	bin7062020	H3K9me3_true
chr11	129100600	129100800	bin7062021	H3K9me3_true
chr11	131801200	131801400	bin7072718	H3K9me3_true
chr11	132094800	132095000	bin7074068	H3K9me3_true
chr11	132103800	132104000	bin7074113	H3K9me3_true
chr11	132162000	132162200	bin7074390	H3K9me3_true
chr11	132373800	132374000	bin7075342	H3K9me3_true
chr11	133718000	133718200	bin7081344	H3K9me3_true
chr11	133817800	133818000	bin7081772	H3K9me3_true
chr10	5033800	5034000	bin7107963	H3K9me3_true
chr10	5165800	5166000	bin7108334	H3K9me3_true
chr10	9713000	9713200	bin7127463	H3K9me3_true
chr10	10272000	10272200	bin7129810	H3K9me3_true
chr10	11727800	11728000	bin7136233	H3K9me3_true
chr10	17340800	17341000	bin7157890	H3K9me3_true
chr10	19109400	19109600	bin7164767	H3K9me3_true
chr10	23774400	23774600	bin7183114	H3K9me3_true
chr10	28856800	28857000	bin7201654	H3K9me3_true
chr10	28858800	28859000	bin7201662	H3K9me3_true
chr10	30483400	30483600	bin7207385	H3K9me3_true
chr10	43524200	43524400	bin7235603	H3K9me3_true
chr10	43617400	43617600	bin7235853	H3K9me3_true
chr10	43617600	43617800	bin7235854	H3K9me3_true
chr10	45475200	45475400	bin7242327	H3K9me3_true
chr10	51043000	51043200	bin7255938	H3K9me3_true
chr10	55320400	55320600	bin7272802	H3K9me3_true
chr10	56212800	56213000	bin7275953	H3K9me3_true
chr10	56625400	56625600	bin7277541	H3K9me3_true
chr10	58005200	58005400	bin7282808	H3K9me3_true
chr10	59497000	59497200	bin7288690	H3K9me3_true
chr10	60989800	60990000	bin7295018	H3K9me3_true
chr10	64223800	64224000	bin7308254	H3K9me3_true
chr10	65254800	65255000	bin7312206	H3K9me3_true
chr10	65581600	65581800	bin7313463	H3K9me3_true
chr10	65652800	65653000	bin7313722	H3K9me3_true
chr10	65968400	65968600	bin7315066	H3K9me3_true
chr10	65996200	65996400	bin7315141	H3K9me3_true
chr10	66230800	66231000	bin7316114	H3K9me3_true
chr10	66414800	66415000	bin7316867	H3K9me3_true
chr10	67476800	67477000	bin7321041	H3K9me3_true
chr10	67477200	67477400	bin7321043	H3K9me3_true
chr10	67597800	67598000	bin7321370	H3K9me3_true
chr10	68860600	68860800	bin7325425	H3K9me3_true
chr10	69541000	69541200	bin7327994	H3K9me3_true
chr10	70647800	70648000	bin7332537	H3K9me3_true
chr10	70648800	70649000	bin7332541	H3K9me3_true
chr10	70649000	70649200	bin7332542	H3K9me3_true
chr10	70652000	70652200	bin7332543	H3K9me3_true
chr10	71946400	71946600	bin7338176	H3K9me3_true
chr10	71946800	71947000	bin7338178	H3K9me3_true
chr10	71947400	71947600	bin7338181	H3K9me3_true
chr10	72980400	72980600	bin7341875	H3K9me3_true
chr10	72980600	72980800	bin7341876	H3K9me3_true
chr10	74817200	74817400	bin7348269	H3K9me3_true
chr10	76644200	76644400	bin7355980	H3K9me3_true
chr10	81084000	81084200	bin7372433	H3K9me3_true
chr10	81614600	81614800	bin7374352	H3K9me3_true
chr10	81656600	81656800	bin7374470	H3K9me3_true
chr10	81657000	81657200	bin7374472	H3K9me3_true
chr10	82218400	82218600	bin7376801	H3K9me3_true
chr10	82358600	82358800	bin7377428	H3K9me3_true
chr10	82908800	82909000	bin7379850	H3K9me3_true
chr10	83109200	83109400	bin7380698	H3K9me3_true
chr10	83526200	83526400	bin7382224	H3K9me3_true
chr10	83526400	83526600	bin7382225	H3K9me3_true
chr10	83615000	83615200	bin7382604	H3K9me3_true
chr10	83774000	83774200	bin7383251	H3K9me3_true
chr10	83790600	83790800	bin7383280	H3K9me3_true
chr10	84783600	84783800	bin7387051	H3K9me3_true
chr10	84818800	84819000	bin7387156	H3K9me3_true
chr10	84913600	84913800	bin7387533	H3K9me3_true
chr10	84940200	84940400	bin7387641	H3K9me3_true
chr10	84963600	84963800	bin7387749	H3K9me3_true
chr10	84963800	84964000	bin7387750	H3K9me3_true
chr10	85441600	85441800	bin7389549	H3K9me3_true
chr10	85529400	85529600	bin7389867	H3K9me3_true
chr10	99006000	99006200	bin7440003	H3K9me3_true
chr10	102192400	102192600	bin7452155	H3K9me3_true
chr10	119356000	119356200	bin7523146	H3K9me3_true
chr10	127636600	127636800	bin7557879	H3K9me3_true
chr12	9910800	9911000	bin7619275	H3K9me3_true
chr12	19701200	19701400	bin7656499	H3K9me3_true
chr12	21946200	21946400	bin7664754	H3K9me3_true
chr12	23601000	23601200	bin7671159	H3K9me3_true
chr12	29792000	29792200	bin7695955	H3K9me3_true
chr12	29794000	29794200	bin7695965	H3K9me3_true
chr12	31906400	31906600	bin7702943	H3K9me3_true
chr12	40482600	40482800	bin7718597	H3K9me3_true
chr12	40820400	40820600	bin7719922	H3K9me3_true
chr12	40838000	40838200	bin7720003	H3K9me3_true
chr12	41771800	41772000	bin7723936	H3K9me3_true
chr12	44318000	44318200	bin7733886	H3K9me3_true
chr12	47613000	47613200	bin7746083	H3K9me3_true
chr12	53137000	53137200	bin7766741	H3K9me3_true
chr12	60617000	60617200	bin7794254	H3K9me3_true
chr12	70109000	70109200	bin7830547	H3K9me3_true
chr12	70214600	70214800	bin7830848	H3K9me3_true
chr12	72485200	72485400	bin7840157	H3K9me3_true
chr12	72485400	72485600	bin7840158	H3K9me3_true
chr12	72758200	72758400	bin7841275	H3K9me3_true
chr12	74922000	74922200	bin7849180	H3K9me3_true
chr12	75050600	75050800	bin7849655	H3K9me3_true
chr12	77554600	77554800	bin7859752	H3K9me3_true
chr12	78587200	78587400	bin7864137	H3K9me3_true
chr12	81865800	81866000	bin7877736	H3K9me3_true
chr12	82121600	82121800	bin7878600	H3K9me3_true
chr12	86484400	86484600	bin7895688	H3K9me3_true
chr12	88716000	88716200	bin7904059	H3K9me3_true
chr12	88915200	88915400	bin7904865	H3K9me3_true
chr12	88915400	88915600	bin7904866	H3K9me3_true
chr12	90383000	90383200	bin7911253	H3K9me3_true
chr12	90383200	90383400	bin7911254	H3K9me3_true
chr12	93865200	93865400	bin7925389	H3K9me3_true
chr12	97283800	97284000	bin7938883	H3K9me3_true
chr12	97297000	97297200	bin7938940	H3K9me3_true
chr12	97672400	97672600	bin7940549	H3K9me3_true
chr12	99649800	99650000	bin7948322	H3K9me3_true
chr12	103130800	103131000	bin7961772	H3K9me3_true
chr12	103133000	103133200	bin7961783	H3K9me3_true
chr12	103160600	103160800	bin7961890	H3K9me3_true
chr12	103198000	103198200	bin7962040	H3K9me3_true
chr12	103198200	103198400	bin7962041	H3K9me3_true
chr12	107593800	107594000	bin7979917	H3K9me3_true
chr12	109782400	109782600	bin7988903	H3K9me3_true
chr12	111304200	111304400	bin7994455	H3K9me3_true
chr12	111304600	111304800	bin7994457	H3K9me3_true
chr12	117128000	117128200	bin8017881	H3K9me3_true
chr12	124048000	124048200	bin8043450	H3K9me3_true
chr12	124049200	124049400	bin8043456	H3K9me3_true
chr12	124764800	124765000	bin8046574	H3K9me3_true
chr12	125606600	125606800	bin8049899	H3K9me3_true
chr12	125606800	125607000	bin8049900	H3K9me3_true
chr12	125687800	125688000	bin8050218	H3K9me3_true
chr12	125711200	125711400	bin8050324	H3K9me3_true
chr12	125734600	125734800	bin8050403	H3K9me3_true
chr12	126006400	126006600	bin8051517	H3K9me3_true
chr12	126181600	126181800	bin8052219	H3K9me3_true
chr12	126265400	126265600	bin8052604	H3K9me3_true
chr12	126326800	126327000	bin8052813	H3K9me3_true
chr12	126348400	126348600	bin8052907	H3K9me3_true
chr12	126609000	126609200	bin8054013	H3K9me3_true
chr12	127786200	127786400	bin8058896	H3K9me3_true
chr12	127855800	127856000	bin8059189	H3K9me3_true
chr12	128119000	128119200	bin8060273	H3K9me3_true
chr12	131812000	131812200	bin8074965	H3K9me3_true
chr12	132925800	132926000	bin8079329	H3K9me3_true
chr12	132950400	132950600	bin8079419	H3K9me3_true
chr12	132950600	132950800	bin8079420	H3K9me3_true
chr12	132951800	132952000	bin8079426	H3K9me3_true
chr12	133062400	133062600	bin8079790	H3K9me3_true
chr12	133121600	133121800	bin8080001	H3K9me3_true
chr12	133125800	133126000	bin8080021	H3K9me3_true
chr12	133172600	133172800	bin8080200	H3K9me3_true
chr12	133222200	133222400	bin8080356	H3K9me3_true
chr13	41149600	41149800	bin8164339	H3K9me3_true
chr13	80534600	80534800	bin8321547	H3K9me3_true
chr13	80628600	80628800	bin8321937	H3K9me3_true
chr13	80637000	80637200	bin8321969	H3K9me3_true
chr13	80666000	80666200	bin8322069	H3K9me3_true
chr13	80669600	80669800	bin8322087	H3K9me3_true
chr13	80712000	80712200	bin8322167	H3K9me3_true
chr13	80754400	80754600	bin8322350	H3K9me3_true
chr13	80757200	80757400	bin8322364	H3K9me3_true
chr13	80761000	80761200	bin8322378	H3K9me3_true
chr13	80769400	80769600	bin8322419	H3K9me3_true
chr13	80790200	80790400	bin8322516	H3K9me3_true
chr13	80801800	80802000	bin8322571	H3K9me3_true
chr13	80803000	80803200	bin8322574	H3K9me3_true
chr13	80824200	80824400	bin8322662	H3K9me3_true
chr13	80830600	80830800	bin8322674	H3K9me3_true
chr13	80836200	80836400	bin8322680	H3K9me3_true
chr13	80888600	80888800	bin8322891	H3K9me3_true
chr13	89837400	89837600	bin8358626	H3K9me3_true
chr13	89890000	89890200	bin8358862	H3K9me3_true
chr13	89892200	89892400	bin8358867	H3K9me3_true
chr13	89892800	89893000	bin8358870	H3K9me3_true
chr13	89893000	89893200	bin8358871	H3K9me3_true
chr13	89897800	89898000	bin8358894	H3K9me3_true
chr13	89930800	89931000	bin8359020	H3K9me3_true
chr13	89931000	89931200	bin8359021	H3K9me3_true
chr13	89934200	89934400	bin8359032	H3K9me3_true
chr13	89936400	89936600	bin8359042	H3K9me3_true
chr13	89936600	89936800	bin8359043	H3K9me3_true
chr13	89991400	89991600	bin8359293	H3K9me3_true
chr13	89996400	89996600	bin8359313	H3K9me3_true
chr13	89999000	89999200	bin8359325	H3K9me3_true
chr13	90000800	90001000	bin8359332	H3K9me3_true
chr13	90017200	90017400	bin8359403	H3K9me3_true
chr13	90033200	90033400	bin8359460	H3K9me3_true
chr13	90055200	90055400	bin8359556	H3K9me3_true
chr13	90071000	90071200	bin8359634	H3K9me3_true
chr13	90071200	90071400	bin8359635	H3K9me3_true
chr13	90087800	90088000	bin8359706	H3K9me3_true
chr13	90100000	90100200	bin8359758	H3K9me3_true
chr13	90103600	90103800	bin8359767	H3K9me3_true
chr13	90104600	90104800	bin8359772	H3K9me3_true
chr13	90104800	90105000	bin8359773	H3K9me3_true
chr13	90105000	90105200	bin8359774	H3K9me3_true
chr13	90107000	90107200	bin8359784	H3K9me3_true
chr13	90107800	90108000	bin8359788	H3K9me3_true
chr13	90108400	90108600	bin8359791	H3K9me3_true
chr13	90135600	90135800	bin8359910	H3K9me3_true
chr13	90135800	90136000	bin8359911	H3K9me3_true
chr13	90163800	90164000	bin8360000	H3K9me3_true
chr13	90170200	90170400	bin8360029	H3K9me3_true
chr13	90187800	90188000	bin8360090	H3K9me3_true
chr13	90189600	90189800	bin8360099	H3K9me3_true
chr13	90197600	90197800	bin8360136	H3K9me3_true
chr13	90201200	90201400	bin8360153	H3K9me3_true
chr13	90207200	90207400	bin8360181	H3K9me3_true
chr13	90252800	90253000	bin8360374	H3K9me3_true
chr13	90256600	90256800	bin8360393	H3K9me3_true
chr13	90297800	90298000	bin8360539	H3K9me3_true
chr13	90298000	90298200	bin8360540	H3K9me3_true
chr13	90299200	90299400	bin8360546	H3K9me3_true
chr13	90305600	90305800	bin8360574	H3K9me3_true
chr13	90306600	90306800	bin8360579	H3K9me3_true
chr13	90306800	90307000	bin8360580	H3K9me3_true
chr13	90309400	90309600	bin8360591	H3K9me3_true
chr13	90310800	90311000	bin8360597	H3K9me3_true
chr13	90322200	90322400	bin8360651	H3K9me3_true
chr13	90322400	90322600	bin8360652	H3K9me3_true
chr13	90348200	90348400	bin8360756	H3K9me3_true
chr13	90360600	90360800	bin8360796	H3K9me3_true
chr13	90364200	90364400	bin8360810	H3K9me3_true
chr13	90371400	90371600	bin8360840	H3K9me3_true
chr13	90401000	90401200	bin8360948	H3K9me3_true
chr13	90401200	90401400	bin8360949	H3K9me3_true
chr13	90401400	90401600	bin8360950	H3K9me3_true
chr13	90404400	90404600	bin8360962	H3K9me3_true
chr13	90404600	90404800	bin8360963	H3K9me3_true
chr13	90404800	90405000	bin8360964	H3K9me3_true
chr13	90427400	90427600	bin8361068	H3K9me3_true
chr13	90435000	90435200	bin8361091	H3K9me3_true
chr13	90441000	90441200	bin8361118	H3K9me3_true
chr13	90447000	90447200	bin8361146	H3K9me3_true
chr13	90447200	90447400	bin8361147	H3K9me3_true
chr13	90500000	90500200	bin8361352	H3K9me3_true
chr13	90502200	90502400	bin8361363	H3K9me3_true
chr13	90502400	90502600	bin8361364	H3K9me3_true
chr13	90519000	90519200	bin8361443	H3K9me3_true
chr13	90519200	90519400	bin8361444	H3K9me3_true
chr13	90519400	90519600	bin8361445	H3K9me3_true
chr13	90519600	90519800	bin8361446	H3K9me3_true
chr13	90520000	90520200	bin8361448	H3K9me3_true
chr13	90538200	90538400	bin8361509	H3K9me3_true
chr13	90538400	90538600	bin8361510	H3K9me3_true
chr13	90564200	90564400	bin8361588	H3K9me3_true
chr13	90564400	90564600	bin8361589	H3K9me3_true
chr13	90576200	90576400	bin8361637	H3K9me3_true
chr13	90577800	90578000	bin8361645	H3K9me3_true
chr13	90594600	90594800	bin8361715	H3K9me3_true
chr13	90614400	90614600	bin8361804	H3K9me3_true
chr13	90614600	90614800	bin8361805	H3K9me3_true
chr13	90620600	90620800	bin8361815	H3K9me3_true
chr13	90637400	90637600	bin8361897	H3K9me3_true
chr13	90639600	90639800	bin8361907	H3K9me3_true
chr13	90641400	90641600	bin8361911	H3K9me3_true
chr13	90653400	90653600	bin8361947	H3K9me3_true
chr13	90659000	90659200	bin8361967	H3K9me3_true
chr13	90700200	90700400	bin8362115	H3K9me3_true
chr13	90700600	90700800	bin8362117	H3K9me3_true
chr13	90702400	90702600	bin8362126	H3K9me3_true
chr13	90713200	90713400	bin8362163	H3K9me3_true
chr13	90726000	90726200	bin8362225	H3K9me3_true
chr13	90727400	90727600	bin8362232	H3K9me3_true
chr13	90727800	90728000	bin8362234	H3K9me3_true
chr13	90757000	90757200	bin8362329	H3K9me3_true
chr13	90757200	90757400	bin8362330	H3K9me3_true
chr13	90758800	90759000	bin8362338	H3K9me3_true
chr13	90764000	90764200	bin8362364	H3K9me3_true
chr13	90764400	90764600	bin8362366	H3K9me3_true
chr13	90772200	90772400	bin8362402	H3K9me3_true
chr13	90790600	90790800	bin8362474	H3K9me3_true
chr13	90794200	90794400	bin8362491	H3K9me3_true
chr13	90827200	90827400	bin8362610	H3K9me3_true
chr13	90882400	90882600	bin8362812	H3K9me3_true
chr13	90884200	90884400	bin8362821	H3K9me3_true
chr13	90887800	90888000	bin8362839	H3K9me3_true
chr13	90896000	90896200	bin8362869	H3K9me3_true
chr13	90903200	90903400	bin8362903	H3K9me3_true
chr13	90926600	90926800	bin8363007	H3K9me3_true
chr13	90933200	90933400	bin8363033	H3K9me3_true
chr13	90935400	90935600	bin8363042	H3K9me3_true
chr13	90946400	90946600	bin8363088	H3K9me3_true
chr13	90947400	90947600	bin8363090	H3K9me3_true
chr13	90962800	90963000	bin8363154	H3K9me3_true
chr13	90972200	90972400	bin8363186	H3K9me3_true
chr13	90973400	90973600	bin8363192	H3K9me3_true
chr13	90977000	90977200	bin8363209	H3K9me3_true
chr13	90986000	90986200	bin8363226	H3K9me3_true
chr13	90993400	90993600	bin8363263	H3K9me3_true
chr13	90995800	90996000	bin8363275	H3K9me3_true
chr13	90999400	90999600	bin8363291	H3K9me3_true
chr13	91010600	91010800	bin8363344	H3K9me3_true
chr13	91032000	91032200	bin8363444	H3K9me3_true
chr13	91032200	91032400	bin8363445	H3K9me3_true
chr13	91037800	91038000	bin8363471	H3K9me3_true
chr13	91038000	91038200	bin8363472	H3K9me3_true
chr13	91041800	91042000	bin8363486	H3K9me3_true
chr13	91042000	91042200	bin8363487	H3K9me3_true
chr13	91056800	91057000	bin8363559	H3K9me3_true
chr13	91057200	91057400	bin8363561	H3K9me3_true
chr13	91058200	91058400	bin8363564	H3K9me3_true
chr13	91058400	91058600	bin8363565	H3K9me3_true
chr13	91063000	91063200	bin8363584	H3K9me3_true
chr13	91063800	91064000	bin8363586	H3K9me3_true
chr13	91087400	91087600	bin8363693	H3K9me3_true
chr13	91092400	91092600	bin8363716	H3K9me3_true
chr13	91092600	91092800	bin8363717	H3K9me3_true
chr13	91093000	91093200	bin8363719	H3K9me3_true
chr13	91108400	91108600	bin8363789	H3K9me3_true
chr13	91110000	91110200	bin8363795	H3K9me3_true
chr13	91132400	91132600	bin8363901	H3K9me3_true
chr13	91162000	91162200	bin8364042	H3K9me3_true
chr13	91176200	91176400	bin8364111	H3K9me3_true
chr13	91176600	91176800	bin8364113	H3K9me3_true
chr13	91220200	91220400	bin8364315	H3K9me3_true
chr13	91266600	91266800	bin8364509	H3K9me3_true
chr13	91266800	91267000	bin8364510	H3K9me3_true
chr13	91267400	91267600	bin8364513	H3K9me3_true
chr13	91475600	91475800	bin8365401	H3K9me3_true
chr13	91476000	91476200	bin8365403	H3K9me3_true
chr13	91554200	91554400	bin8365724	H3K9me3_true
chr13	91560200	91560400	bin8365748	H3K9me3_true
chr13	91592600	91592800	bin8365888	H3K9me3_true
chr13	91611800	91612000	bin8365962	H3K9me3_true
chr13	91622200	91622400	bin8366011	H3K9me3_true
chr13	91622600	91622800	bin8366013	H3K9me3_true
chr13	91649400	91649600	bin8366134	H3K9me3_true
chr13	91667600	91667800	bin8366220	H3K9me3_true
chr13	91668200	91668400	bin8366223	H3K9me3_true
chr13	91673000	91673200	bin8366239	H3K9me3_true
chr13	91676200	91676400	bin8366253	H3K9me3_true
chr13	91682600	91682800	bin8366284	H3K9me3_true
chr13	91693400	91693600	bin8366332	H3K9me3_true
chr13	91693600	91693800	bin8366333	H3K9me3_true
chr13	91730200	91730400	bin8366489	H3K9me3_true
chr13	91758800	91759000	bin8366611	H3K9me3_true
chr13	91768800	91769000	bin8366656	H3K9me3_true
chr13	92365000	92365200	bin8368522	H3K9me3_true
chr13	92421800	92422000	bin8368766	H3K9me3_true
chr13	92426200	92426400	bin8368788	H3K9me3_true
chr13	92433400	92433600	bin8368822	H3K9me3_true
chr13	92434000	92434200	bin8368825	H3K9me3_true
chr13	92450600	92450800	bin8368888	H3K9me3_true
chr13	92466000	92466200	bin8368960	H3K9me3_true
chr13	92468800	92469000	bin8368974	H3K9me3_true
chr13	92484400	92484600	bin8368992	H3K9me3_true
chr13	92485800	92486000	bin8368998	H3K9me3_true
chr13	92498600	92498800	bin8369053	H3K9me3_true
chr13	92500000	92500200	bin8369060	H3K9me3_true
chr13	92608800	92609000	bin8369356	H3K9me3_true
chr13	103263400	103263600	bin8413069	H3K9me3_true
chr13	111313200	111313400	bin8447626	H3K9me3_true
chr14	19893800	19894000	bin8459293	H3K9me3_true
chr14	19894000	19894200	bin8459294	H3K9me3_true
chr14	19894400	19894600	bin8459296	H3K9me3_true
chr14	31270400	31270600	bin8501963	H3K9me3_true
chr14	32263000	32263200	bin8505488	H3K9me3_true
chr14	32263400	32263600	bin8505490	H3K9me3_true
chr14	42929000	42929200	bin8545834	H3K9me3_true
chr14	45452600	45452800	bin8554852	H3K9me3_true
chr14	86831800	86832000	bin8718205	H3K9me3_true
chr14	97914400	97914600	bin8763649	H3K9me3_true
chr14	99703000	99703200	bin8771831	H3K9me3_true
chr14	100807600	100807800	bin8776439	H3K9me3_true
chr14	100808800	100809000	bin8776445	H3K9me3_true
chr14	100811800	100812000	bin8776459	H3K9me3_true
chr14	101666400	101666600	bin8780138	H3K9me3_true
chr15	25069000	25069200	bin8801234	H3K9me3_true
chr15	25069200	25069400	bin8801235	H3K9me3_true
chr15	35278400	35278600	bin8833399	H3K9me3_true
chr15	37558400	37558600	bin8842908	H3K9me3_true
chr15	37650400	37650600	bin8843289	H3K9me3_true
[truncated: 1,630 more rows]
